# Supplementary material for: Electrochemistry-enabled Ir-catalyzed C–H/N–N bond activation facilitates [3+2] annulation of phenidones with propiolates
Source: Royal Society of Chemistry journal article supplement (doi:10.1039/d4cc03124e), 2025-01-01

## Supporting Information

### Electrochemistry-Enabled Ir-Catalyzed C-H/N-N Bond Activation Facilitates [3+2] Annulation of Phenidones with Propiolates

LuLu Zhao,<sup>&, a</sup> Jianjing, Yang,<sup>&\*, a</sup> Kelu Yan,<sup>a</sup> Xingda Cheng,<sup>a</sup> Ziyang Xiao,<sup>a</sup> and Jiangwei Wen<sup>\* a</sup>

<sup>a</sup> Institute of Medicine and Materials Applied Technologies, College of Chemistry and Chemical Engineering, Qufu Normal University, Qufu, Shandong 273165, China. Email: [jjyang@whu.edu.cn](mailto:jjyang@whu.edu.cn), [wenjy@qfnu.edu.cn](mailto:wenjy@qfnu.edu.cn)

<sup>&</sup> L. Zhao and J. Yang contributed equally to this work.

#### 1. General information

All glassware was oven-dried at 100 °C for 3 h and cooled down under the atmospheric environment. All the reaction prepared using the solvent of methanol (AR) was purchased from Adamas. Unless otherwise noted, materials were obtained from commercial suppliers and used without further purification. The instrument for electrolysis is dual display potentiostat (DJS-292B) (made in China) and the carbon rod (d: 6 mm) was purchased from Xuzhou Xinke Instrument and Meter Co. LTD. The thin-layer chromatography (TLC) employed glass 0.25 mm silica gel plates. Flash chromatography columns were packed with 200-300 mesh silica gel in petroleum (b. p. 60-90 °C). <sup>1</sup>H, <sup>13</sup>C and <sup>19</sup>F NMR data were recorded with Bruker Advance III (500 MHz) spectrometers with tetramethylsilane as an internal standard. All chemical shifts (δ) are reported in ppm and coupling constants (*J*) in Hz. All chemical shifts are reported relative to tetramethylsilane and *d*-solvent peaks (77.00 ppm, CDCl<sub>3</sub>, 44.00 ppm, DMSO-*d*<sub>6</sub>).

#### 2. General procedure for synthesis

##### (1) Synthesis of phenidone derivatives

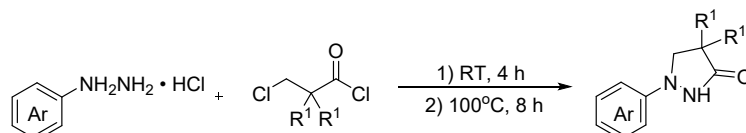

Phenylhydrazine hydrochloride derivatives (34.3 mmol, 1.0 equiv.) was dissolved in pyridine (100 mL). The solution was cooled in an ice bath and 3-chloro-2,2-dimethylpropionyl chloride derivatives (34.3 mmol, 1.0 equiv.) was added over 5 min. The reaction was allowed to warm to room temperature, and then stirred for 4 hours. After that, the reaction was moved to an oil bath stirring for 8 hours at 100 °C and then cooled to room temperature. Next, the reaction solution was poured into a 500 mL beaker, diluted with 150 mL DCM. And then, poured 150 mL aqueous HCl (3 M) into the beaker, stirred with a glass rod. The organic phase was separated and washed with 150 mL aqueous HCl (3 M) again. After that, the organic phase was washed with saturated sodium bicarbonate solution and saturated sodium chloride solution respectively. Then the organic layer was dried over anhydrous Na<sub>2</sub>SO<sub>4</sub>, and evaporated to dryness. The crude product was purified by flash chromatography over silica gel using PE/EA (3:1) to afford the corresponding products.

##### (2) Synthesis of methyl propiolate derivatives

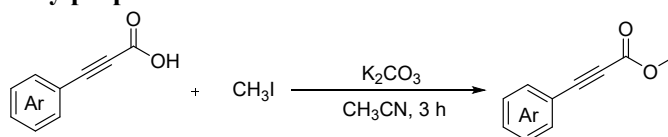

CH<sub>3</sub>I (2.2 mmol) and K<sub>2</sub>CO<sub>3</sub> (2.2 mmol) were added to the solution of phenylpropionic acids (2 mmol) in acetonitrile and the obtained mixture was stirred at room temperature. The reaction was monitored by TLC until the starting disappeared.

After 3 hours, the mixture was extracted with ether (3 x 5 mL). The combined ether part was purified by column chromatography on silica gel (dichloromethane: hexane = 1:3) to give pure methyl 3-phenylpropiolate derivatives.

### (3) Synthesis of [D]<sub>5</sub>-1a

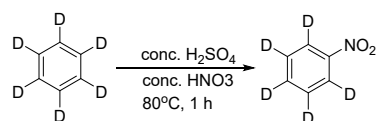

Concentrated nitric acid and concentrated sulfuric acid (1:1 v/v) were mixed together in a 25 mL round-bottom flask held in an ice-water bath. [D]<sub>6</sub>-benzene (5.0 mL, 56.0 mmol) was added drop-wise at room temperature and the reaction was allowed to stir at 80 °C for 1h. The reaction mixture was poured into ice-water and extracted with DCM. The product was used without further purification (5.4 g, 75%).

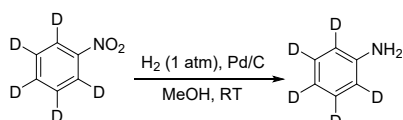

Crude [D]<sub>5</sub>-nitrobenzene was dissolved in MeOH and Pd/C (10 mol%) was added then the reaction was held under H<sub>2</sub> atmosphere (1 atm) at room temperature for overnight. The reaction mixture was checked by TLC and filtered over celite then the solvent removed under reduced pressure. The crude [D]<sub>5</sub>-aniline was used without further purification (3.2 g, 77%).

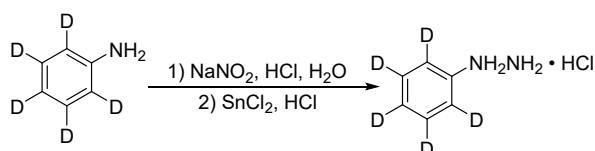

To a solution of [D]<sub>5</sub>-aniline (1.0 g, 10 mmol) in 10 ml of 37% HCl was added drop wise the solution of NaNO<sub>2</sub> (718 mg , 10.4 mmol) in 10 mL of H<sub>2</sub>O while cooling with an ice-water bath. The reaction mixture was stirred at 0 °C for 1 h to give a clear solution. Then to the solution was added drop wise a solution of SnCl<sub>2</sub> (2.67g , 14mmol) in 20 mL of 37% HCl at 0 °C. Then the mixture was stirred at room temperature for 2 h. The solid product was filtered, washed with 37% HCl and dried in a vacuum desiccator. The [D]<sub>5</sub>-phenylhydrazine hydrochloride could be used in subsequent reactions without further purification (3.7 g, 77%).

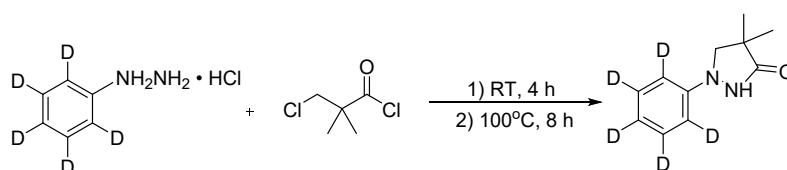

[D]<sub>5</sub>-phenylhydrazine hydrochloride (5 g, 34.3 mmol, 1.0 equiv.) was dissolved in pyridine (100 mL). The solution was cooled in an ice bath and 3-chloro-2,2-dimethylpropionyl chloride (5.3 g, 34.3 mmol, 1.0 equiv.) was added over 5 min. The reaction was allowed to warm to room temperature, and then stirred for 4 hours. After that, the reaction was moved to an oil bath stirring for 8 hours at 100 °C and then cooled to room temperature. Next, the reaction solution was poured into a 500 mL beaker, diluted with 150 mL DCM. And then, poured 150 mL aqueous HCl (3 M) into the beaker, stirred with a glass rod. The organic phase was separated and washed with 150 mL aqueous HCl (3 M) again. After that, the organic phase was washed with saturated sodium bicarbonate solution and saturated sodium chloride solution respectively. Then the organic layer was dried over anhydrous Na<sub>2</sub>SO<sub>4</sub>, and evaporated to dryness. The crude product was purified by flash chromatography over silica gel using PE/EA (3:1) to afford the corresponding [D]<sub>5</sub>-pyrazolidinone 1a-[D]<sub>5</sub>.

### 3. General procedure

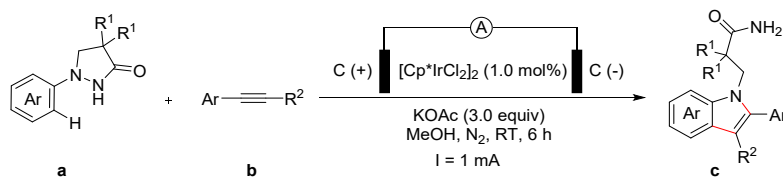

In an oven-dried undivided three-necked flask (25 mL) equipped with a stir bar, **a** (0.5 mmol), [Cp\*IrCl<sub>2</sub>]<sub>2</sub> (1.0 mol%) and KOAc (0.75 mmol) were combined and added. The flask was equipped with a carbon rods ( $\phi = 6$  mm, merge in solution 1.5 cm) as the anode and carbon rods ( $\phi = 6$  mm, merge in solution 1.5 cm) as the cathode and was then charged with nitrogen. Under the protection of nitrogen, **b** (0.25 mmol) and MeOH (6.0 mL) were slowly injected into the reaction flask. The reaction mixture was stirred and electrolyzed at a constant current of 1 mA (0.42 mA/cm<sup>2</sup>) under RT for 6 h. When the reaction was finished, the solution was concentrated in a vacuum. The desired product **c** was subjected to column chromatography on silica gel.

### 4. Mechanism study

#### (1) Deuteration experiments

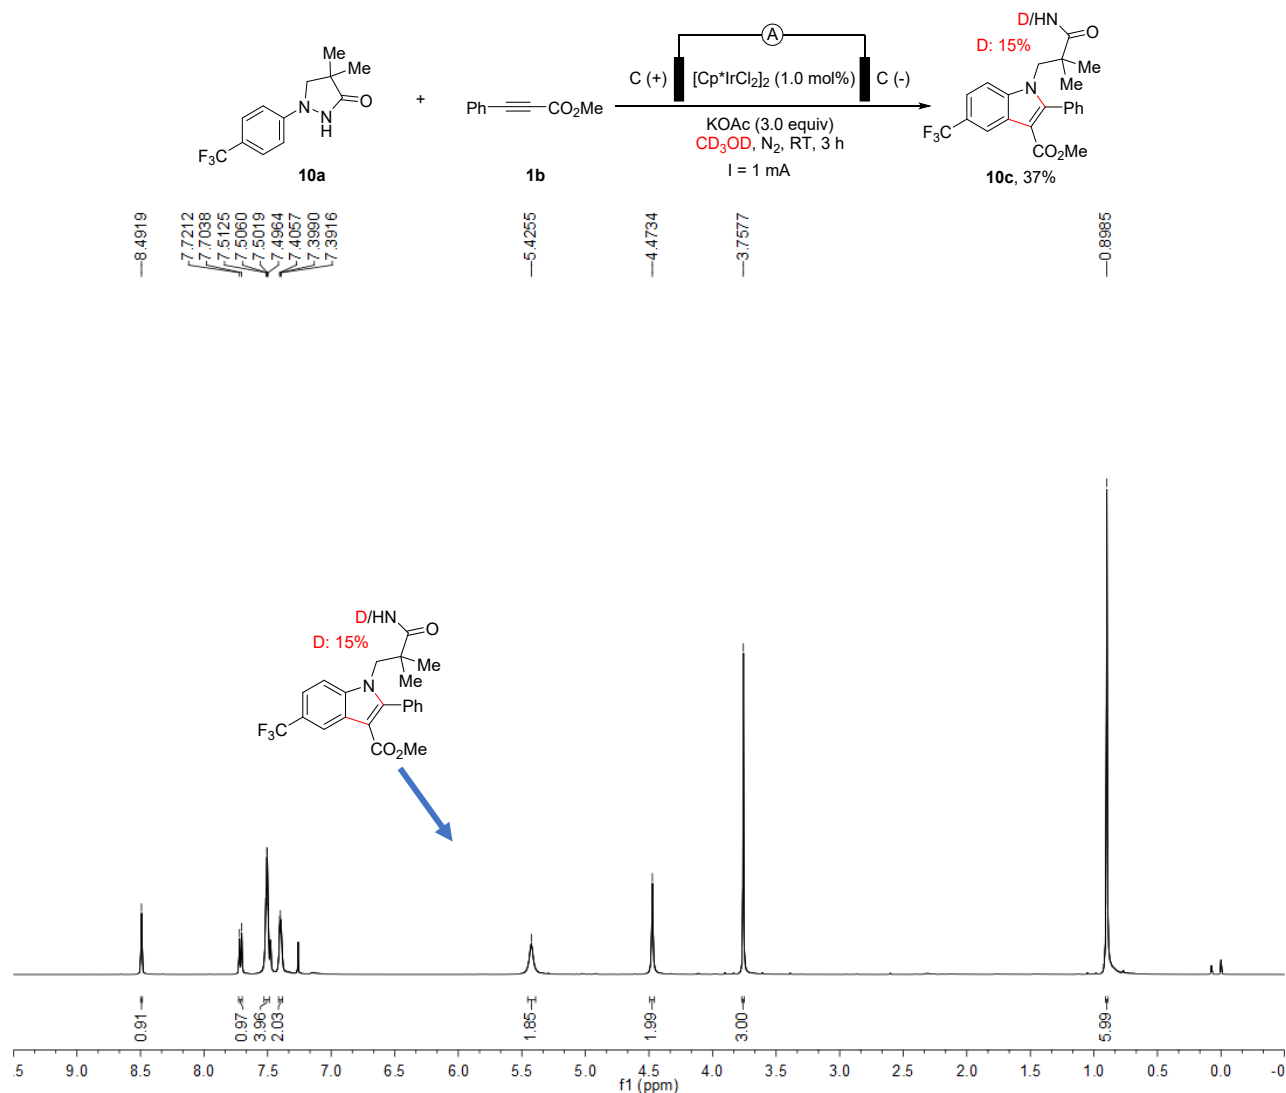

**Figure S1.** <sup>1</sup>H NMR results of **10c**.

In an oven-dried undivided three-necked flask (25 mL) equipped with a stir bar, **10a** (0.25 mmol), [Cp\*IrCl<sub>2</sub>]<sub>2</sub> (1.0 mol%) and KOAc (0.75 mmol) were combined and added. The flask was equipped with a carbon rods ( $\phi = 6$  mm, merge in solution 1.5 cm) as the anode and carbon rods ( $\phi = 6$  mm, merge in solution 1.5 cm) as the cathode and was then charged with nitrogen. Under the protection of nitrogen, **1b** (0.25 mmol) and MeOH (6.0 mL) were slowly injected into the reaction flask. The reaction mixture was stirred and electrolyzed at a constant current of 1 mA (0.42 mA/cm<sup>2</sup>) under RT for 6 h. When the reaction was finished, the solution was concentrated in a vacuum. The desired product **c** was subjected to column chromatography on silica gel.

solution 1.5 cm) as the anode and carbon rods ( $\phi = 6$  mm, merge in solution 1.5 cm) as the cathode and was then charged with nitrogen. Under the protection of nitrogen, **1b** (0.25 mmol) and CD<sub>3</sub>OD (6.0 mL) were slowly injected into the reaction flask. The reaction mixture was stirred and electrolyzed at a constant current of 1 mA (0.42 mA/cm<sup>2</sup>) under RT for 3 h. When the reaction was finished, the solution was concentrated in a vacuum. The desired product **10c** was subjected to column chromatography on silica gel (yield: 37%, Deuteration: 15%).

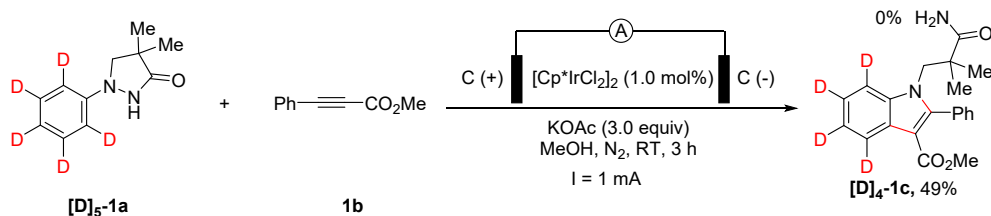

In an oven-dried undivided three-necked flask (25 mL) equipped with a stir bar, **[D]<sub>5</sub>-1a** (0.5 mmol), **[Cp\*IrCl<sub>2</sub>]<sub>2</sub>** (1.0 mol%) and KOAc (0.75 mmol) were combined and added. The flask was equipped with a carbon rods ( $\phi = 6$  mm, merge in solution 1.5 cm) as the anode and carbon rods ( $\phi = 6$  mm, merge in solution 1.5 cm) as the cathode and was then charged with nitrogen. Under the protection of nitrogen, **1b** (0.25 mmol) and MeOH (6.0 mL) were slowly injected into the reaction flask. The reaction mixture was stirred and electrolyzed at a constant current of 1 mA (0.42 mA/cm<sup>2</sup>) under RT for 3 h. When the reaction was finished, the solution was concentrated in a vacuum. The desired product **[D]<sub>4</sub>-1c** was subjected to column chromatography on silica gel (yield: 49%, Deuteration: 0%).

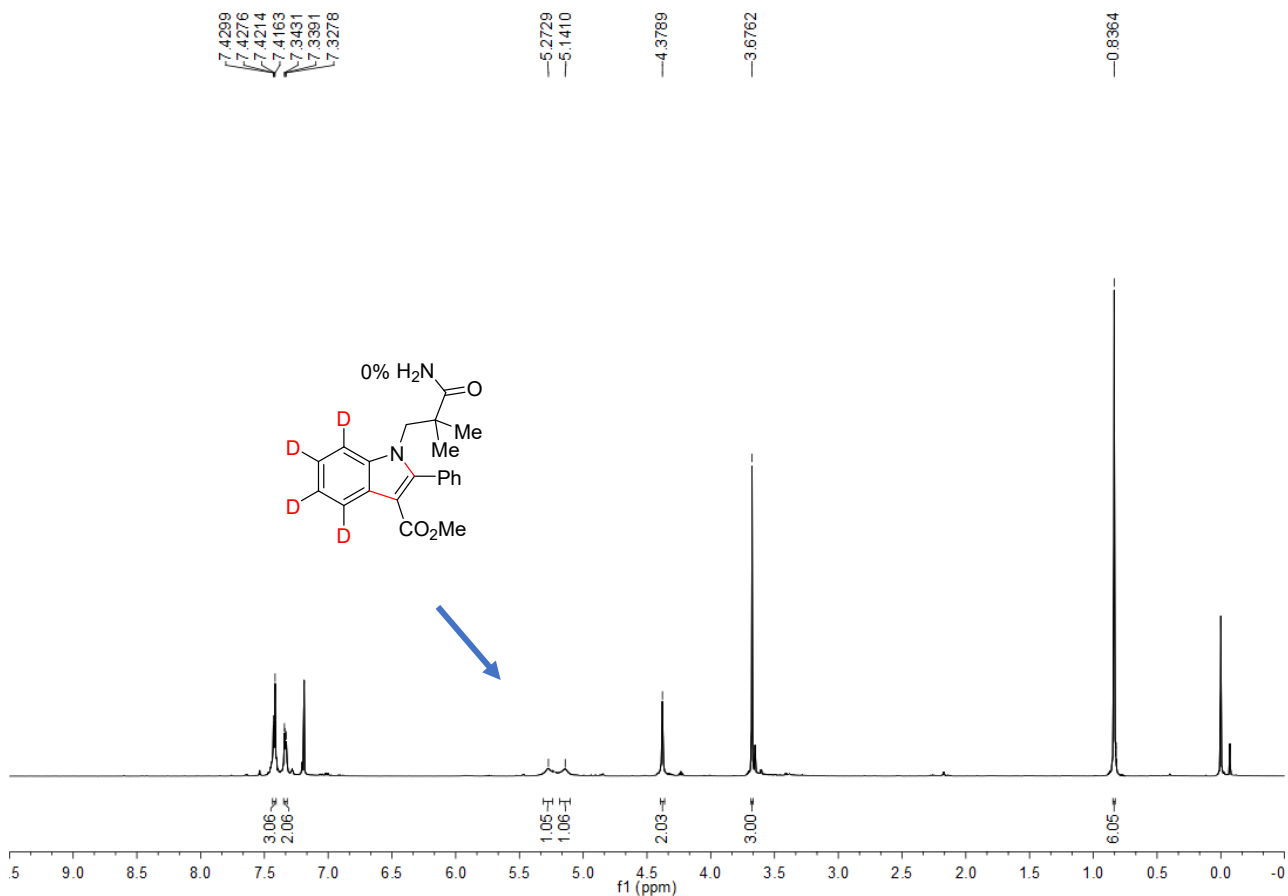

**Figure S2.** <sup>1</sup>H NMR results of **[D]<sub>4</sub>-1c**.

## (2) Kinetic Isotope Effect experiments

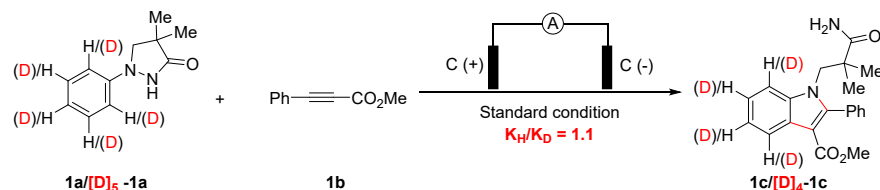

In an oven-dried undivided three-necked flask (25 mL) equipped with a stir bar, **1a** (0.5 mmol) or  $[D]_5$ -**1a** (0.5 mmol),  $[Cp^*IrCl_2]_2$  (1.0 mol%) and KOAc (0.75 mmol) were combined and added. The flask was equipped with a carbon rods ( $\phi = 6$  mm, merge in solution 1.5 cm) as the anode and carbon rods ( $\phi = 6$  mm, merge in solution 1.5 cm) as the cathode and was then charged with nitrogen. Under the protection of nitrogen, **1b** (0.25 mmol) and MeOH (6.0 mL) were slowly injected into the reaction flask. The reaction mixture was stirred and electrolyzed at a constant current of 1 mA (0.42 mA/cm<sup>2</sup>) under RT for 1 h. When the reaction was finished, the solution was concentrated in a vacuum. The desired product **1c** (Yield: 24%) or  $[D]_4$ -**1c** (Yield: 22%) was subjected to column chromatography on silica gel.  $K_H/K_D = 1.1$ , this result is the average of three parallel experiments.

## (3) Ir catalytic species

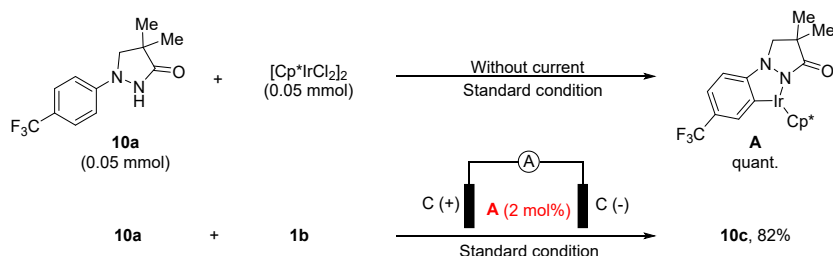

In an oven-dried undivided three-necked flask (25 mL) equipped with a stir bar, **10a** (0.05 mmol),  $[Cp^*IrCl_2]_2$  (0.05 mmol) and KOAc (0.15 mmol) were combined and added. The flask was then charged with nitrogen. Under the protection of nitrogen, CH<sub>3</sub>CN (6.0 mL) were slowly injected into the reaction flask. The reaction mixture was stirred under RT for 6 h. When the reaction was finished, the solution was concentrated in a vacuum. The desired product **A** was subjected to column chromatography on silica gel.

In an oven-dried undivided three-necked flask (25 mL) equipped with a stir bar, **10a** (0.5 mmol), **A** (1.0 mol%) and KOAc (0.75 mmol) were combined and added. The flask was equipped with a carbon rods ( $\phi = 6$  mm, merge in solution 1.5 cm) as the anode and carbon rods ( $\phi = 6$  mm, merge in solution 1.5 cm) as the cathode and was then charged with nitrogen. Under the protection of nitrogen, **1b** (0.25 mmol) and MeOH (6.0 mL) were slowly injected into the reaction flask. The reaction mixture was stirred and electrolyzed at a constant current of 1 mA (0.42 mA/cm<sup>2</sup>) under RT for 6 h. When the reaction was finished, the solution was concentrated in a vacuum. The desired product **10c** was subjected to column chromatography on silica gel (yield: 82%).

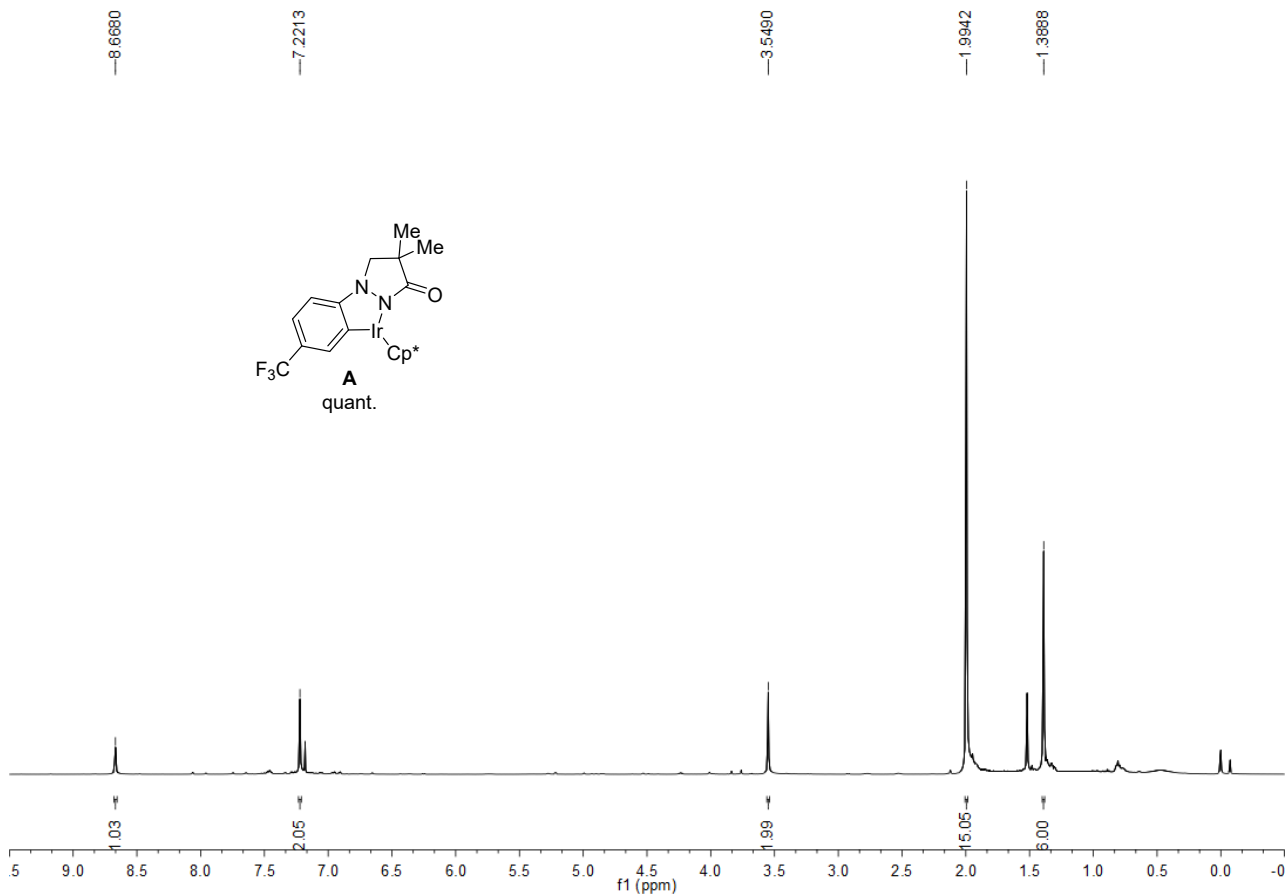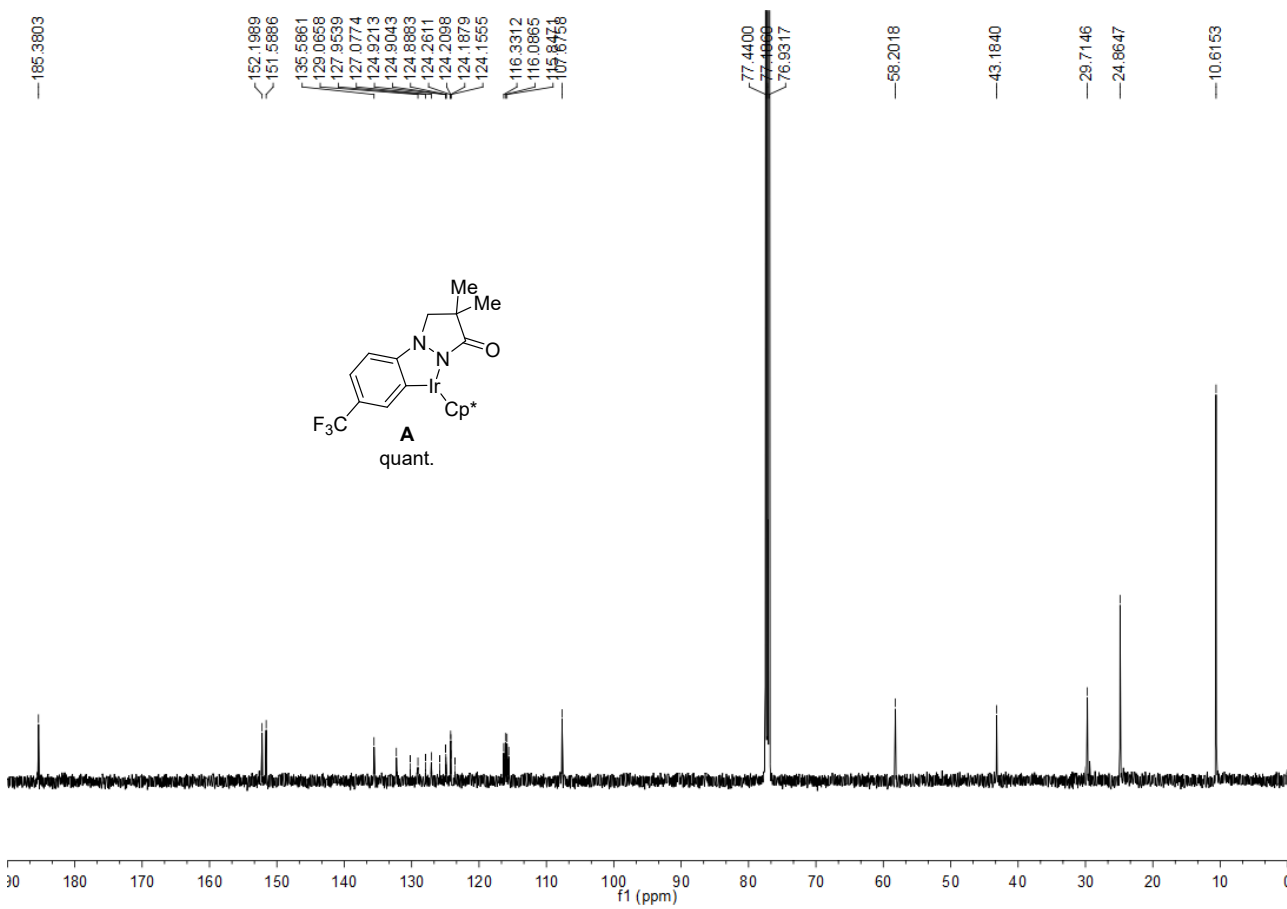

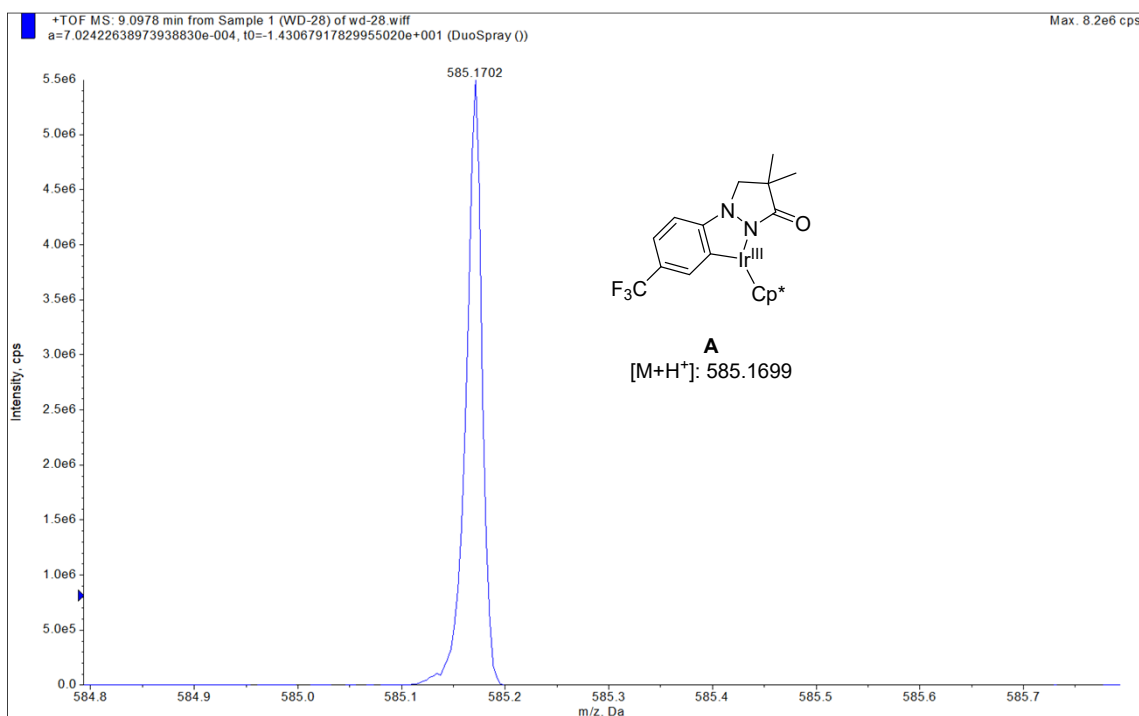

**Figure S3.** <sup>1</sup>H NMR, <sup>13</sup>C NMR, and HRMS results of **A**.

**Compound A:** red solid was obtained by column chromatography. <sup>1</sup>H NMR (500 MHz, CDCl<sub>3</sub>) δ 8.67 (s, 1H), 7.22 (s, 2H), 3.55 (s, 2H), 1.99 (s, 15H), 1.39 (s, 6H). <sup>13</sup>C NMR (126 MHz, CDCl<sub>3</sub>) δ 185.3, 152.2, 151.5, 135.5, 129.0, 129.05 (q, *J* = 267.3 Hz), 127.0, 124.94 – 124.88 (m), 124.28 – 124.14 (m), 115.96 (q, *J* = 32.4 Hz), 107.6, 58.2, 43.1, 29.7, 24.8, 10.6. HRMS (ESI) *m/z*: [M+H]<sup>+</sup> calcd for C<sub>22</sub>H<sub>27</sub>IrN<sub>2</sub>O<sub>F</sub><sub>3</sub>: 585.1699; found: 585.1702.

The crystal structure of **A** (CCDC: 2385192)

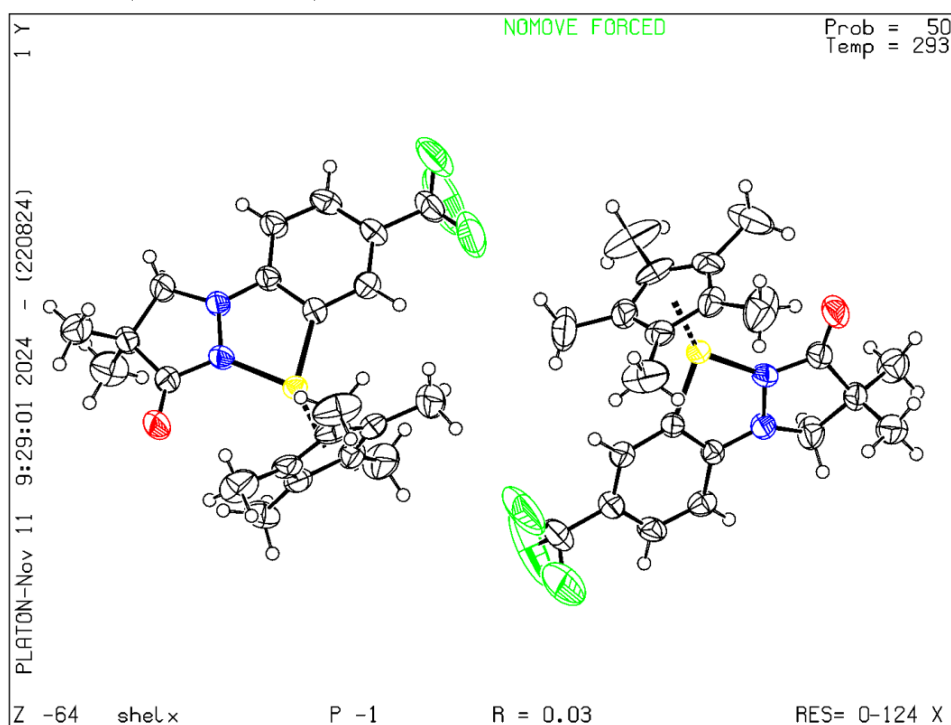

The diffractometer was equipped with a low temperature device and used MoK<sub>α</sub> radiation ( $\lambda = 0.71073 \text{ \AA}$ ). All data were integrated with SAINT and a multi-scan absorption correction using TWINABS was applied. The structure was solved by direct methods using SHELXT and refined by full-matrix least-squares methods against *F*<sup>2</sup> by SHELXL-2018/3. All non-hydrogen atoms were refined with anisotropic displacement parameters. All hydrogen

atoms were refined isotropic on calculated positions using a riding model with their  $U_{\text{iso}}$  values constrained to 1.5 times the  $U_{\text{eq}}$  of their pivot atoms for terminal  $\text{sp}^3$  carbon atoms and 1.2 times for all other carbon atoms. Crystallographic data for the structures reported here have been deposited with the Cambridge Crystallographic Data Centre. CCDC 2385192 contain the supplementary crystallographic data for this paper.

**Table 1. Crystal data and structure refinement for shelx**

|                                            |                                                            |
|--------------------------------------------|------------------------------------------------------------|
| CCDC number                                | 2385192                                                    |
| Empirical formula                          | $\text{C}_{22}\text{H}_{26}\text{F}_3\text{IrN}_2\text{O}$ |
| Formula weight                             | 583.65                                                     |
| Temperature [K]                            | 293(2)                                                     |
| Crystal system                             | triclinic                                                  |
| Space group (number)                       | $P\bar{1}$ (2)                                             |
| $a$ [Å]                                    | 13.152(2)                                                  |
| $b$ [Å]                                    | 13.561(2)                                                  |
| $c$ [Å]                                    | 14.160(2)                                                  |
| $\alpha$ [°]                               | 75.977(5)                                                  |
| $\beta$ [°]                                | 83.773(5)                                                  |
| $\gamma$ [°]                               | 62.963(4)                                                  |
| Volume [Å <sup>3</sup> ]                   | 2182.6(6)                                                  |
| $Z$                                        | 4                                                          |
| $\rho_{\text{calc}}$ [gcm <sup>-3</sup> ]  | 1.776                                                      |
| $\mu$ [mm <sup>-1</sup> ]                  | 6.157                                                      |
| $F(000)$                                   | 1136                                                       |
| Crystal size [mm <sup>3</sup> ]            | 0.230×0.220×0.200                                          |
| Crystal colour                             | red                                                        |
| Crystal shape                              | block                                                      |
| Radiation                                  | $\text{MoK}\alpha$ ( $\lambda=0.71073$ Å)                  |
| $2\theta$ range [°]                        | 4.57 to 50.05 (0.84 Å)                                     |
|                                            | $-15 \leq h \leq 15$                                       |
| Index ranges                               | $-16 \leq k \leq 16$                                       |
|                                            | $-16 \leq l \leq 16$                                       |
| Reflections collected                      | 34657                                                      |
|                                            | 7700                                                       |
| Independent reflections                    | $R_{\text{int}} = 0.0385$                                  |
|                                            | $R_{\text{sigma}} = 0.0341$                                |
| Completeness to<br>$\theta = 25.000^\circ$ | 99.9 %                                                     |
| Data / Restraints / Parameters             | 7700/0/537                                                 |
| Absorption correction                      | 0.5151/0.7457                                              |
| $T_{\text{min}}/T_{\text{max}}$ (method)   | (multi-scan)                                               |
| Goodness-of-fit on $F^2$                   | 1.023                                                      |
| Final $R$ indexes                          | $R_1 = 0.0277$                                             |
| [ $I \geq 2\sigma(I)$ ]                    | $wR_2 = 0.0535$                                            |
| Final $R$ indexes                          | $R_1 = 0.0423$                                             |
| [all data]                                 | $wR_2 = 0.0583$                                            |
| Largest peak/hole [eÅ <sup>-3</sup> ]      | 0.98/−0.59                                                 |

**Table 2. Atomic coordinates and  $U_{\text{eq}}$  [Å<sup>2</sup>] for shelx**

| Atom | $x$        | $y$        | $z$        | $U_{\text{eq}}$ |
|------|------------|------------|------------|-----------------|
| Ir1  | 0.16127(2) | 0.64340(2) | 0.22909(2) | 0.03268(6)      |
| Ir2  | 0.35909(2) | 0.89995(2) | 0.72857(2) | 0.03507(6)      |
| N4   | 0.3686(3)  | 0.8720(4)  | 0.8701(3)  | 0.0390(10)      |
| N1   | 0.2066(3)  | 0.5494(4)  | 0.1332(3)  | 0.0394(10)      |
| O2   | 0.4986(4)  | 0.9258(4)  | 0.9075(3)  | 0.0734(14)      |
| O1   | 0.0437(3)  | 0.5708(4)  | 0.0699(3)  | 0.0718(14)      |
| N3   | 0.2957(4)  | 0.8319(4)  | 0.9282(3)  | 0.0422(11)      |
| C5   | 0.2277(4)  | 0.8150(4)  | 0.8747(4)  | 0.0329(11)      |
| C35  | 0.3330(4)  | 0.5720(4)  | 0.2375(3)  | 0.0329(11)      |
| N2   | 0.3227(3)  | 0.4838(4)  | 0.1189(3)  | 0.0467(12)      |



|      |            |           |           |            |
|------|------------|-----------|-----------|------------|
| C4   | 0.1489(4)  | 0.7739(4) | 0.9192(4) | 0.0412(13) |
| H4   | 0.145810   | 0.751957  | 0.986601  | 0.049      |
| C6   | 0.2388(4)  | 0.8457(4) | 0.7721(4) | 0.0358(12) |
| C15  | 0.5025(5)  | 0.9377(6) | 0.6553(4) | 0.0519(16) |
| C17  | 0.4000(5)  | 1.0349(5) | 0.6411(4) | 0.0483(14) |
| C7   | 0.1619(4)  | 0.8366(4) | 0.7176(4) | 0.0418(13) |
| H7   | 0.164642   | 0.856535  | 0.650103  | 0.050      |
| C34  | 0.4037(4)  | 0.5828(4) | 0.2975(4) | 0.0412(13) |
| H34  | 0.369974   | 0.631040  | 0.340468  | 0.049      |
| C21  | 0.3783(6)  | 0.9077(6) | 0.5734(4) | 0.0545(16) |
| C12  | 0.4274(5)  | 0.8915(5) | 0.9334(4) | 0.0460(14) |
| C24  | 0.1469(5)  | 0.5228(5) | 0.0762(4) | 0.0470(14) |
| C19  | 0.3226(5)  | 1.0175(5) | 0.5903(4) | 0.0475(14) |
| C30  | 0.5107(4)  | 0.4363(4) | 0.1721(4) | 0.0454(14) |
| H30  | 0.545709   | 0.387473  | 0.129819  | 0.055      |
| C32  | 0.5219(4)  | 0.5245(4) | 0.2957(4) | 0.0417(13) |
| C29  | 0.3912(4)  | 0.4963(4) | 0.1745(4) | 0.0370(12) |
| C37  | 0.0701(5)  | 0.6653(5) | 0.3633(4) | 0.0479(14) |
| C3   | 0.0774(5)  | 0.7672(5) | 0.8607(4) | 0.0459(14) |
| H3   | 0.024566   | 0.740794  | 0.888490  | 0.055      |
| F3   | 0.6727(5)  | 0.5614(6) | 0.3170(4) | 0.156(3)   |
| C14  | 0.4893(6)  | 0.8545(5) | 0.6171(4) | 0.0585(18) |
| C38  | -0.0074(4) | 0.6692(5) | 0.2940(4) | 0.0447(14) |
| C2   | 0.0828(5)  | 0.7996(5) | 0.7591(4) | 0.0461(14) |
| C39  | -0.0265(4) | 0.7621(5) | 0.2175(4) | 0.0463(14) |
| F2   | 0.5393(4)  | 0.6149(5) | 0.4106(4) | 0.144(2)   |
| C31  | 0.5746(5)  | 0.4503(5) | 0.2320(4) | 0.0481(14) |
| H31  | 0.653706   | 0.410486  | 0.230986  | 0.058      |
| C10  | 0.3083(5)  | 0.9782(5) | 1.0656(4) | 0.0579(16) |
| H10A | 0.347353   | 1.024743  | 1.057294  | 0.087      |
| H10B | 0.285613   | 0.964301  | 1.132400  | 0.087      |
| H10C | 0.241835   | 1.016499  | 1.024640  | 0.087      |
| C40  | 0.0399(5)  | 0.8168(5) | 0.2357(4) | 0.0519(15) |
| C9   | 0.3878(5)  | 0.8655(5) | 1.0379(4) | 0.0433(13) |
| C36  | 0.0944(5)  | 0.7594(5) | 0.3275(4) | 0.0505(15) |
| C8   | 0.3260(6)  | 0.7959(5) | 1.0298(4) | 0.0569(16) |
| H8A  | 0.375902   | 0.715159  | 1.047126  | 0.068      |
| H8B  | 0.258750   | 0.813467  | 1.070790  | 0.068      |
| F1   | 0.6470(6)  | 0.4471(5) | 0.4264(4) | 0.162(3)   |
| C25  | 0.2289(4)  | 0.4265(5) | 0.0287(4) | 0.0451(14) |
| C28  | 0.3459(5)  | 0.4118(6) | 0.0531(5) | 0.0616(18) |
| H28A | 0.394335   | 0.333475  | 0.083379  | 0.074      |
| H28B | 0.383231   | 0.434397  | -0.005081 | 0.074      |
| C44  | -0.0548(5) | 0.5850(6) | 0.3052(5) | 0.0673(19) |
| H44A | -0.067775  | 0.578467  | 0.242023  | 0.101      |
| H44B | -0.125581  | 0.610219  | 0.340156  | 0.101      |
| H44C | -0.001341  | 0.512412  | 0.340493  | 0.101      |
| F4   | 0.0119(6)  | 0.8243(8) | 0.6073(4) | 0.193(4)   |
| C11  | 0.4882(5)  | 0.8004(5) | 1.1087(4) | 0.0639(18) |
| H11A | 0.535117   | 0.727054  | 1.094602  | 0.096      |
| H11B | 0.460089   | 0.791534  | 1.174111  | 0.096      |
| H11C | 0.532555   | 0.841682  | 1.101886  | 0.096      |
| C42  | 0.0385(6)  | 0.9228(5) | 0.1716(6) | 0.085(2)   |
| H42A | 0.104393   | 0.930170  | 0.185126  | 0.128      |
| H42B | -0.029398  | 0.987219  | 0.184039  | 0.128      |

|      |            |           |            |            |
|------|------------|-----------|------------|------------|
| H42C | 0.039510   | 0.919205  | 0.104645   | 0.128      |
| C33  | 0.5937(6)  | 0.5375(7) | 0.3609(6)  | 0.0657(18) |
| C1   | 0.0021(7)  | 0.7948(8) | 0.6979(6)  | 0.076(2)   |
| C43  | -0.1050(5) | 0.8046(6) | 0.1326(5)  | 0.076(2)   |
| H43A | -0.068489  | 0.826529  | 0.074531   | 0.114      |
| H43B | -0.173945  | 0.869009  | 0.143347   | 0.114      |
| H43C | -0.123055  | 0.745701  | 0.125569   | 0.114      |
| C26  | 0.2096(6)  | 0.3231(5) | 0.0749(5)  | 0.073(2)   |
| H26A | 0.220714   | 0.305485  | 0.144005   | 0.110      |
| H26B | 0.262753   | 0.259794  | 0.048339   | 0.110      |
| H26C | 0.133071   | 0.338617  | 0.061643   | 0.110      |
| F5   | 0.0014(8)  | 0.6996(6) | 0.7116(6)  | 0.208(4)   |
| C23  | 0.1081(6)  | 0.5820(6) | 0.4593(4)  | 0.080(2)   |
| H23A | 0.115705   | 0.509824  | 0.453541   | 0.120      |
| H23B | 0.052457   | 0.609229  | 0.508297   | 0.120      |
| H23C | 0.180287   | 0.573719  | 0.477286   | 0.120      |
| C27  | 0.2054(5)  | 0.4594(6) | -0.0799(4) | 0.0642(18) |
| H27A | 0.126781   | 0.480189  | -0.090683  | 0.096      |
| H27B | 0.253303   | 0.396296  | -0.108871  | 0.096      |
| H27C | 0.221450   | 0.522617  | -0.108879  | 0.096      |
| F6   | -0.1030(5) | 0.8558(8) | 0.7146(5)  | 0.197(4)   |
| C20  | 0.2047(6)  | 1.1066(7) | 0.5553(5)  | 0.093(3)   |
| H20A | 0.160797   | 1.070468  | 0.543335   | 0.140      |
| H20B | 0.210841   | 1.156302  | 0.496282   | 0.140      |
| H20C | 0.167537   | 1.149742  | 0.604167   | 0.140      |
| C16  | 0.6111(6)  | 0.9190(9) | 0.6999(5)  | 0.116(4)   |
| H16A | 0.592176   | 0.959444  | 0.751215   | 0.174      |
| H16B | 0.654227   | 0.946268  | 0.650826   | 0.174      |
| H16C | 0.655689   | 0.839487  | 0.725755   | 0.174      |
| C13  | 0.5788(7)  | 0.7366(6) | 0.6153(6)  | 0.112(3)   |
| H13A | 0.628197   | 0.708166  | 0.670645   | 0.168      |
| H13B | 0.622691   | 0.737609  | 0.556638   | 0.168      |
| H13C | 0.542769   | 0.688319  | 0.617503   | 0.168      |
| C41  | 0.1563(6)  | 0.7989(6) | 0.3815(6)  | 0.084(2)   |
| H41A | 0.208358   | 0.735462  | 0.427466   | 0.126      |
| H41B | 0.102086   | 0.854577  | 0.415411   | 0.126      |
| H41C | 0.198103   | 0.831795  | 0.336090   | 0.126      |
| C22  | 0.3370(8)  | 0.8555(8) | 0.5140(5)  | 0.111(3)   |
| H22A | 0.353722   | 0.779196  | 0.547558   | 0.166      |
| H22B | 0.374717   | 0.854622  | 0.452029   | 0.166      |
| H22C | 0.256060   | 0.899080  | 0.504323   | 0.166      |
| C18  | 0.3740(8)  | 1.1427(6) | 0.6725(5)  | 0.097(3)   |
| H18A | 0.292776   | 1.186449  | 0.676054   | 0.145      |
| H18B | 0.405284   | 1.186005  | 0.626054   | 0.145      |
| H18C | 0.407236   | 1.124094  | 0.735283   | 0.145      |

$U_{eq}$  is defined as 1/3 of the trace of the orthogonalized  $U_{ij}$  tensor.

**Table 3. Anisotropic displacement parameters [ $\text{\AA}^2$ ] for shelx.**

The anisotropic displacement factor exponent takes the form:  $-2\pi^2 [h^2(a^*)^2U_{11} + k^2(b^*)^2U_{22} + \dots + 2hka^*b^*U_{12}]$

| Atom | $U_{11}$    | $U_{22}$    | $U_{33}$    | $U_{23}$    | $U_{13}$    | $U_{12}$     |
|------|-------------|-------------|-------------|-------------|-------------|--------------|
| Ir1  | 0.02875(11) | 0.03250(12) | 0.03238(12) | -0.00689(9) | -0.00025(8) | -0.00987(9)  |
| Ir2  | 0.03632(12) | 0.04230(13) | 0.02965(12) | -0.00741(9) | 0.00356(9)  | -0.02102(10) |
| N4   | 0.038(2)    | 0.048(3)    | 0.039(3)    | -0.009(2)   | 0.005(2)    | -0.027(2)    |
| N1   | 0.027(2)    | 0.042(3)    | 0.047(3)    | -0.014(2)   | -0.0031(19) | -0.011(2)    |
| O2   | 0.091(3)    | 0.126(4)    | 0.050(3)    | -0.028(3)   | 0.013(2)    | -0.086(3)    |
| O1   | 0.035(2)    | 0.100(4)    | 0.089(3)    | -0.056(3)   | -0.004(2)   | -0.020(2)    |

|     |           |           |          |           |           |           |
|-----|-----------|-----------|----------|-----------|-----------|-----------|
| N3  | 0.050(3)  | 0.059(3)  | 0.029(2) | -0.007(2) | 0.004(2)  | -0.035(2) |
| C5  | 0.033(3)  | 0.030(3)  | 0.036(3) | -0.008(2) | -0.002(2) | -0.013(2) |
| C35 | 0.036(3)  | 0.028(3)  | 0.033(3) | -0.001(2) | -0.006(2) | -0.013(2) |
| N2  | 0.025(2)  | 0.055(3)  | 0.062(3) | -0.035(2) | -0.001(2) | -0.008(2) |
| C4  | 0.045(3)  | 0.037(3)  | 0.042(3) | -0.006(2) | 0.008(3)  | -0.021(3) |
| C6  | 0.031(3)  | 0.035(3)  | 0.037(3) | -0.011(2) | -0.003(2) | -0.010(2) |
| C15 | 0.046(4)  | 0.087(5)  | 0.028(3) | 0.004(3)  | 0.008(2)  | -0.044(4) |
| C17 | 0.069(4)  | 0.048(4)  | 0.037(3) | -0.010(3) | 0.011(3)  | -0.036(3) |
| C7  | 0.039(3)  | 0.049(3)  | 0.037(3) | -0.012(3) | 0.001(2)  | -0.019(3) |
| C34 | 0.042(3)  | 0.037(3)  | 0.043(3) | -0.009(2) | 0.000(2)  | -0.016(3) |
| C21 | 0.070(4)  | 0.078(5)  | 0.039(3) | -0.020(3) | 0.014(3)  | -0.052(4) |
| C12 | 0.050(3)  | 0.057(4)  | 0.041(3) | -0.013(3) | 0.004(3)  | -0.032(3) |
| C24 | 0.037(3)  | 0.060(4)  | 0.045(3) | -0.020(3) | -0.002(3) | -0.018(3) |
| C19 | 0.042(3)  | 0.067(4)  | 0.027(3) | -0.001(3) | 0.001(2)  | -0.023(3) |
| C30 | 0.035(3)  | 0.042(3)  | 0.060(4) | -0.017(3) | -0.004(3) | -0.013(3) |
| C32 | 0.035(3)  | 0.041(3)  | 0.052(3) | -0.006(3) | -0.009(2) | -0.019(3) |
| C29 | 0.030(3)  | 0.035(3)  | 0.044(3) | -0.011(2) | -0.004(2) | -0.010(2) |
| C37 | 0.048(3)  | 0.057(4)  | 0.036(3) | -0.013(3) | 0.003(3)  | -0.021(3) |
| C3  | 0.042(3)  | 0.049(3)  | 0.058(4) | -0.014(3) | 0.008(3)  | -0.030(3) |
| F3  | 0.144(5)  | 0.322(9)  | 0.111(4) | -0.077(5) | 0.020(3)  | -0.187(6) |
| C14 | 0.063(4)  | 0.054(4)  | 0.041(3) | -0.006(3) | 0.031(3)  | -0.019(3) |
| C38 | 0.038(3)  | 0.052(4)  | 0.041(3) | -0.013(3) | 0.008(2)  | -0.018(3) |
| C2  | 0.042(3)  | 0.052(4)  | 0.053(4) | -0.018(3) | 0.000(3)  | -0.024(3) |
| C39 | 0.025(3)  | 0.046(3)  | 0.052(4) | -0.016(3) | 0.004(2)  | -0.001(3) |
| F2  | 0.084(3)  | 0.197(6)  | 0.192(6) | -0.138(5) | -0.019(4) | -0.046(4) |
| C31 | 0.030(3)  | 0.046(3)  | 0.065(4) | -0.009(3) | -0.005(3) | -0.014(3) |
| C10 | 0.051(4)  | 0.067(4)  | 0.055(4) | -0.013(3) | 0.001(3)  | -0.025(3) |
| C40 | 0.039(3)  | 0.037(3)  | 0.064(4) | -0.014(3) | 0.016(3)  | -0.005(3) |
| C9  | 0.051(3)  | 0.055(4)  | 0.034(3) | -0.013(3) | 0.001(2)  | -0.030(3) |
| C36 | 0.039(3)  | 0.055(4)  | 0.059(4) | -0.032(3) | 0.012(3)  | -0.015(3) |
| C8  | 0.080(5)  | 0.071(4)  | 0.037(3) | -0.010(3) | 0.005(3)  | -0.051(4) |
| F1  | 0.199(6)  | 0.139(5)  | 0.158(5) | 0.031(4)  | -0.138(5) | -0.085(5) |
| C25 | 0.038(3)  | 0.049(3)  | 0.054(4) | -0.023(3) | -0.003(3) | -0.018(3) |
| C28 | 0.039(3)  | 0.077(5)  | 0.082(5) | -0.054(4) | 0.006(3)  | -0.020(3) |
| C44 | 0.061(4)  | 0.085(5)  | 0.075(5) | -0.015(4) | 0.014(3)  | -0.053(4) |
| F4  | 0.202(6)  | 0.433(12) | 0.062(3) | -0.020(5) | -0.018(4) | -0.254(8) |
| C11 | 0.065(4)  | 0.067(4)  | 0.051(4) | -0.010(3) | -0.005(3) | -0.022(4) |
| C42 | 0.073(5)  | 0.039(4)  | 0.116(6) | -0.011(4) | 0.033(4)  | -0.011(4) |
| C33 | 0.044(4)  | 0.082(5)  | 0.079(5) | -0.027(4) | -0.014(4) | -0.028(4) |
| C1  | 0.067(5)  | 0.122(7)  | 0.074(5) | -0.030(5) | -0.002(4) | -0.065(5) |
| C43 | 0.042(4)  | 0.081(5)  | 0.060(4) | -0.009(4) | -0.011(3) | 0.011(4)  |
| C26 | 0.065(5)  | 0.059(4)  | 0.088(5) | -0.011(4) | -0.002(4) | -0.022(4) |
| F5  | 0.296(10) | 0.167(6)  | 0.244(9) | -0.001(6) | -0.150(7) | -0.162(7) |
| C23 | 0.082(5)  | 0.112(6)  | 0.033(4) | 0.001(4)  | -0.001(3) | -0.041(5) |
| C27 | 0.050(4)  | 0.071(5)  | 0.064(4) | -0.026(4) | 0.003(3)  | -0.016(4) |
| F6  | 0.072(4)  | 0.335(11) | 0.218(7) | -0.148(8) | -0.019(4) | -0.074(5) |
| C20 | 0.057(5)  | 0.118(7)  | 0.059(5) | 0.015(4)  | -0.005(4) | -0.016(5) |
| C16 | 0.072(5)  | 0.231(11) | 0.063(5) | 0.007(6)  | -0.008(4) | -0.099(7) |
| C13 | 0.110(7)  | 0.065(5)  | 0.094(6) | -0.001(4) | 0.058(5)  | -0.001(5) |
| C41 | 0.067(5)  | 0.104(6)  | 0.109(6) | -0.070(5) | 0.012(4)  | -0.040(5) |
| C22 | 0.175(9)  | 0.186(9)  | 0.061(5) | -0.065(6) | 0.040(5)  | -0.147(8) |
| C18 | 0.161(8)  | 0.082(6)  | 0.083(6) | -0.033(4) | 0.030(5)  | -0.083(6) |

**Table 4. Bond lengths and angles for shelx**

| Atom-Atom | Length [Å] |
|-----------|------------|
| Ir1-N1    | 1.948(4)   |

|         |          |
|---------|----------|
| Ir1-C35 | 2.017(5) |
| Ir1-C37 | 2.143(5) |

|         |          |
|---------|----------|
| Ir1-C36 | 2.174(5) |
| Ir1-C40 | 2.179(5) |
| Ir1-C38 | 2.213(5) |
| Ir1-C39 | 2.250(5) |
| Ir2-N4  | 1.955(4) |
| Ir2-C6  | 2.013(5) |
| Ir2-C19 | 2.144(5) |
| Ir2-C21 | 2.167(6) |
| Ir2-C14 | 2.175(5) |
| Ir2-C17 | 2.197(5) |
| Ir2-C15 | 2.257(5) |
| N4-C12  | 1.385(6) |
| N4-N3   | 1.406(5) |
| N1-C24  | 1.391(6) |
| N1-N2   | 1.396(5) |
| O2-C12  | 1.211(6) |
| O1-C24  | 1.212(6) |
| N3-C5   | 1.357(6) |
| N3-C8   | 1.440(6) |
| C5-C4   | 1.413(7) |
| C5-C6   | 1.421(7) |
| C35-C34 | 1.402(7) |
| C35-C29 | 1.420(7) |
| N2-C29  | 1.349(6) |
| N2-C28  | 1.422(6) |
| C4-C3   | 1.364(7) |
| C4-H4   | 0.9300   |
| C6-C7   | 1.401(7) |
| C15-C17 | 1.383(8) |
| C15-C14 | 1.446(9) |
| C15-C16 | 1.513(8) |
| C17-C19 | 1.439(8) |
| C17-C18 | 1.509(8) |
| C7-C2   | 1.370(7) |
| C7-H7   | 0.9300   |
| C34-C32 | 1.388(7) |
| C34-H34 | 0.9300   |
| C21-C19 | 1.398(8) |
| C21-C14 | 1.434(9) |
| C21-C22 | 1.497(8) |
| C12-C9  | 1.528(7) |
| C24-C25 | 1.519(7) |
| C19-C20 | 1.511(8) |
| C30-C31 | 1.355(7) |
| C30-C29 | 1.404(7) |
| C30-H30 | 0.9300   |
| C32-C31 | 1.406(7) |
| C32-C33 | 1.481(8) |
| C37-C36 | 1.417(8) |
| C37-C38 | 1.465(7) |
| C37-C23 | 1.505(8) |
| C3-C2   | 1.402(7) |
| C3-H3   | 0.9300   |
| F3-C33  | 1.281(8) |
| C14-C13 | 1.499(8) |

|          |          |
|----------|----------|
| C38-C39  | 1.391(7) |
| C38-C44  | 1.502(8) |
| C2-C1    | 1.475(8) |
| C39-C40  | 1.452(8) |
| C39-C43  | 1.494(8) |
| F2-C33   | 1.294(8) |
| C31-H31  | 0.9300   |
| C10-C9   | 1.528(8) |
| C10-H10A | 0.9600   |
| C10-H10B | 0.9600   |
| C10-H10C | 0.9600   |
| C40-C36  | 1.419(8) |
| C40-C42  | 1.496(8) |
| C9-C11   | 1.524(8) |
| C9-C8    | 1.528(7) |
| C36-C41  | 1.506(8) |
| C8-H8A   | 0.9700   |
| C8-H8B   | 0.9700   |
| F1-C33   | 1.290(8) |
| C25-C26  | 1.517(8) |
| C25-C27  | 1.518(8) |
| C25-C28  | 1.526(7) |
| C28-H28A | 0.9700   |
| C28-H28B | 0.9700   |
| C44-H44A | 0.9600   |
| C44-H44B | 0.9600   |
| C44-H44C | 0.9600   |
| F4-C1    | 1.259(8) |
| C11-H11A | 0.9600   |
| C11-H11B | 0.9600   |
| C11-H11C | 0.9600   |
| C42-H42A | 0.9600   |
| C42-H42B | 0.9600   |
| C42-H42C | 0.9600   |
| C1-F5    | 1.261(9) |
| C1-F6    | 1.279(9) |
| C43-H43A | 0.9600   |
| C43-H43B | 0.9600   |
| C43-H43C | 0.9600   |
| C26-H26A | 0.9600   |
| C26-H26B | 0.9600   |
| C26-H26C | 0.9600   |
| C23-H23A | 0.9600   |
| C23-H23B | 0.9600   |
| C23-H23C | 0.9600   |
| C27-H27A | 0.9600   |
| C27-H27B | 0.9600   |
| C27-H27C | 0.9600   |
| C20-H20A | 0.9600   |
| C20-H20B | 0.9600   |
| C20-H20C | 0.9600   |
| C16-H16A | 0.9600   |
| C16-H16B | 0.9600   |
| C16-H16C | 0.9600   |
| C13-H13A | 0.9600   |

|                |            |
|----------------|------------|
| C13–H13B       | 0.9600     |
| C13–H13C       | 0.9600     |
| C41–H41A       | 0.9600     |
| C41–H41B       | 0.9600     |
| C41–H41C       | 0.9600     |
| C22–H22A       | 0.9600     |
| C22–H22B       | 0.9600     |
| C22–H22C       | 0.9600     |
| C18–H18A       | 0.9600     |
| C18–H18B       | 0.9600     |
| C18–H18C       | 0.9600     |
|                |            |
| Atom–Atom–Atom | Angle [°]  |
| N1–Ir1–C35     | 78.16(18)  |
| N1–Ir1–C37     | 141.8(2)   |
| C35–Ir1–C37    | 116.5(2)   |
| N1–Ir1–C36     | 174.1(2)   |
| C35–Ir1–C36    | 107.2(2)   |
| C37–Ir1–C36    | 38.3(2)    |
| N1–Ir1–C40     | 136.4(2)   |
| C35–Ir1–C40    | 128.0(2)   |
| C37–Ir1–C40    | 64.1(2)    |
| C36–Ir1–C40    | 38.1(2)    |
| N1–Ir1–C38     | 112.50(19) |
| C35–Ir1–C38    | 151.3(2)   |
| C37–Ir1–C38    | 39.3(2)    |
| C36–Ir1–C38    | 64.1(2)    |
| C40–Ir1–C38    | 63.2(2)    |
| N1–Ir1–C39     | 110.86(18) |
| C35–Ir1–C39    | 166.0(2)   |
| C37–Ir1–C39    | 63.4(2)    |
| C36–Ir1–C39    | 63.4(2)    |
| C40–Ir1–C39    | 38.2(2)    |
| C38–Ir1–C39    | 36.31(19)  |
| N4–Ir2–C6      | 78.29(18)  |
| N4–Ir2–C19     | 149.0(2)   |
| C6–Ir2–C19     | 113.4(2)   |
| N4–Ir2–C21     | 170.1(2)   |
| C6–Ir2–C21     | 105.8(2)   |
| C19–Ir2–C21    | 37.8(2)    |
| N4–Ir2–C14     | 132.1(2)   |
| C6–Ir2–C14     | 129.5(2)   |
| C19–Ir2–C14    | 63.7(2)    |
| C21–Ir2–C14    | 38.6(2)    |
| N4–Ir2–C17     | 117.68(19) |
| C6–Ir2–C17     | 147.2(2)   |
| C19–Ir2–C17    | 38.7(2)    |
| C21–Ir2–C17    | 63.6(2)    |
| C14–Ir2–C17    | 62.8(2)    |
| N4–Ir2–C15     | 111.16(18) |
| C6–Ir2–C15     | 167.5(2)   |
| C19–Ir2–C15    | 62.9(2)    |
| C21–Ir2–C15    | 63.5(2)    |
| C14–Ir2–C15    | 38.0(2)    |
| C17–Ir2–C15    | 36.1(2)    |

|             |          |
|-------------|----------|
| C12–N4–N3   | 106.3(4) |
| C12–N4–Ir2  | 134.5(3) |
| N3–N4–Ir2   | 118.9(3) |
| C24–N1–N2   | 107.2(4) |
| C24–N1–Ir1  | 133.8(3) |
| N2–N1–Ir1   | 118.8(3) |
| C5–N3–N4    | 112.6(4) |
| C5–N3–C8    | 133.3(4) |
| N4–N3–C8    | 112.6(4) |
| N3–C5–C4    | 121.5(5) |
| N3–C5–C6    | 115.2(4) |
| C4–C5–C6    | 123.2(5) |
| C34–C35–C29 | 115.0(4) |
| C34–C35–Ir1 | 130.2(4) |
| C29–C35–Ir1 | 114.7(3) |
| C29–N2–N1   | 113.5(4) |
| C29–N2–C28  | 132.3(4) |
| N1–N2–C28   | 114.1(4) |
| C3–C4–C5    | 118.2(5) |
| C3–C4–H4    | 120.9    |
| C5–C4–H4    | 120.9    |
| C7–C6–C5    | 114.8(5) |
| C7–C6–Ir2   | 130.4(4) |
| C5–C6–Ir2   | 114.8(3) |
| C17–C15–C14 | 107.2(5) |
| C17–C15–C16 | 127.9(7) |
| C14–C15–C16 | 124.9(7) |
| C17–C15–Ir2 | 69.6(3)  |
| C14–C15–Ir2 | 67.9(3)  |
| C16–C15–Ir2 | 128.7(4) |
| C15–C17–C19 | 109.1(5) |
| C15–C17–C18 | 125.5(6) |
| C19–C17–C18 | 125.4(6) |
| C15–C17–Ir2 | 74.3(3)  |
| C19–C17–Ir2 | 68.7(3)  |
| C18–C17–Ir2 | 123.8(4) |
| C2–C7–C6    | 123.1(5) |
| C2–C7–H7    | 118.5    |
| C6–C7–H7    | 118.5    |
| C32–C34–C35 | 122.8(5) |
| C32–C34–H34 | 118.6    |
| C35–C34–H34 | 118.6    |
| C19–C21–C14 | 107.3(5) |
| C19–C21–C22 | 127.8(7) |
| C14–C21–C22 | 124.7(7) |
| C19–C21–Ir2 | 70.2(3)  |
| C14–C21–Ir2 | 71.0(3)  |
| C22–C21–Ir2 | 127.9(4) |
| O2–C12–N4   | 123.8(5) |
| O2–C12–C9   | 125.9(5) |
| N4–C12–C9   | 110.3(4) |
| O1–C24–N1   | 122.3(5) |
| O1–C24–C25  | 127.4(5) |
| N1–C24–C25  | 110.3(4) |
| C21–C19–C17 | 108.3(5) |

|               |          |
|---------------|----------|
| C21-C19-C20   | 126.5(6) |
| C17-C19-C20   | 125.1(6) |
| C21-C19-Ir2   | 72.0(3)  |
| C17-C19-Ir2   | 72.6(3)  |
| C20-C19-Ir2   | 124.7(4) |
| C31-C30-C29   | 119.4(5) |
| C31-C30-H30   | 120.3    |
| C29-C30-H30   | 120.3    |
| C34-C32-C31   | 119.5(5) |
| C34-C32-C33   | 121.1(5) |
| C31-C32-C33   | 119.4(5) |
| N2-C29-C30    | 122.4(5) |
| N2-C29-C35    | 114.8(4) |
| C30-C29-C35   | 122.8(5) |
| C36-C37-C38   | 107.7(5) |
| C36-C37-C23   | 126.5(6) |
| C38-C37-C23   | 125.7(6) |
| C36-C37-Ir1   | 72.0(3)  |
| C38-C37-Ir1   | 72.9(3)  |
| C23-C37-Ir1   | 124.7(4) |
| C4-C3-C2      | 120.8(5) |
| C4-C3-H3      | 119.6    |
| C2-C3-H3      | 119.6    |
| C21-C14-C15   | 108.0(5) |
| C21-C14-C13   | 125.5(7) |
| C15-C14-C13   | 126.3(7) |
| C21-C14-Ir2   | 70.4(3)  |
| C15-C14-Ir2   | 74.0(3)  |
| C13-C14-Ir2   | 125.1(4) |
| C39-C38-C37   | 108.0(5) |
| C39-C38-C44   | 127.2(6) |
| C37-C38-C44   | 124.8(5) |
| C39-C38-Ir1   | 73.3(3)  |
| C37-C38-Ir1   | 67.8(3)  |
| C44-C38-Ir1   | 123.6(4) |
| C7-C2-C3      | 120.0(5) |
| C7-C2-C1      | 120.5(6) |
| C3-C2-C1      | 119.5(5) |
| C38-C39-C40   | 108.0(5) |
| C38-C39-C43   | 127.5(6) |
| C40-C39-C43   | 124.4(6) |
| C38-C39-Ir1   | 70.4(3)  |
| C40-C39-Ir1   | 68.2(3)  |
| C43-C39-Ir1   | 129.1(4) |
| C30-C31-C32   | 120.4(5) |
| C30-C31-H31   | 119.8    |
| C32-C31-H31   | 119.8    |
| C9-C10-H10A   | 109.5    |
| C9-C10-H10B   | 109.5    |
| H10A-C10-H10B | 109.5    |
| C9-C10-H10C   | 109.5    |
| H10A-C10-H10C | 109.5    |
| H10B-C10-H10C | 109.5    |
| C36-C40-C39   | 108.2(5) |
| C36-C40-C42   | 127.3(6) |

|               |          |
|---------------|----------|
| C39-C40-C42   | 124.2(6) |
| C36-C40-Ir1   | 70.8(3)  |
| C39-C40-Ir1   | 73.6(3)  |
| C42-C40-Ir1   | 126.4(4) |
| C11-C9-C12    | 111.6(5) |
| C11-C9-C10    | 109.3(5) |
| C12-C9-C10    | 107.9(5) |
| C11-C9-C8     | 112.9(5) |
| C12-C9-C8     | 102.0(4) |
| C10-C9-C8     | 112.9(5) |
| C37-C36-C40   | 107.9(5) |
| C37-C36-C41   | 126.1(6) |
| C40-C36-C41   | 125.7(6) |
| C37-C36-Ir1   | 69.7(3)  |
| C40-C36-Ir1   | 71.2(3)  |
| C41-C36-Ir1   | 129.5(4) |
| N3-C8-C9      | 102.3(4) |
| N3-C8-H8A     | 111.3    |
| C9-C8-H8A     | 111.3    |
| N3-C8-H8B     | 111.3    |
| C9-C8-H8B     | 111.3    |
| H8A-C8-H8B    | 109.2    |
| C26-C25-C27   | 110.2(5) |
| C26-C25-C24   | 107.6(5) |
| C27-C25-C24   | 109.7(5) |
| C26-C25-C28   | 112.6(5) |
| C27-C25-C28   | 113.1(5) |
| C24-C25-C28   | 103.2(4) |
| N2-C28-C25    | 104.7(4) |
| N2-C28-H28A   | 110.8    |
| C25-C28-H28A  | 110.8    |
| N2-C28-H28B   | 110.8    |
| C25-C28-H28B  | 110.8    |
| H28A-C28-H28B | 108.9    |
| C38-C44-H44A  | 109.5    |
| C38-C44-H44B  | 109.5    |
| H44A-C44-H44B | 109.5    |
| C38-C44-H44C  | 109.5    |
| H44A-C44-H44C | 109.5    |
| H44B-C44-H44C | 109.5    |
| C9-C11-H11A   | 109.5    |
| C9-C11-H11B   | 109.5    |
| H11A-C11-H11B | 109.5    |
| C9-C11-H11C   | 109.5    |
| H11A-C11-H11C | 109.5    |
| H11B-C11-H11C | 109.5    |
| C40-C42-H42A  | 109.5    |
| C40-C42-H42B  | 109.5    |
| H42A-C42-H42B | 109.5    |
| C40-C42-H42C  | 109.5    |
| H42A-C42-H42C | 109.5    |
| H42B-C42-H42C | 109.5    |
| F3-C33-F1     | 104.2(6) |
| F3-C33-F2     | 104.9(7) |
| F1-C33-F2     | 103.7(7) |

|               |          |
|---------------|----------|
| F3–C33–C32    | 114.0(6) |
| F1–C33–C32    | 113.5(6) |
| F2–C33–C32    | 115.3(6) |
| F4–C1–F5      | 105.3(8) |
| F4–C1–F6      | 104.1(8) |
| F5–C1–F6      | 99.5(7)  |
| F4–C1–C2      | 116.3(6) |
| F5–C1–C2      | 115.3(8) |
| F6–C1–C2      | 114.2(7) |
| C39–C43–H43A  | 109.5    |
| C39–C43–H43B  | 109.5    |
| H43A–C43–H43B | 109.5    |
| C39–C43–H43C  | 109.5    |
| H43A–C43–H43C | 109.5    |
| H43B–C43–H43C | 109.5    |
| C25–C26–H26A  | 109.5    |
| C25–C26–H26B  | 109.5    |
| H26A–C26–H26B | 109.5    |
| C25–C26–H26C  | 109.5    |
| H26A–C26–H26C | 109.5    |
| H26B–C26–H26C | 109.5    |
| C37–C23–H23A  | 109.5    |
| C37–C23–H23B  | 109.5    |
| H23A–C23–H23B | 109.5    |
| C37–C23–H23C  | 109.5    |
| H23A–C23–H23C | 109.5    |
| H23B–C23–H23C | 109.5    |
| C25–C27–H27A  | 109.5    |
| C25–C27–H27B  | 109.5    |
| H27A–C27–H27B | 109.5    |
| C25–C27–H27C  | 109.5    |
| H27A–C27–H27C | 109.5    |
| H27B–C27–H27C | 109.5    |
| C19–C20–H20A  | 109.5    |
| C19–C20–H20B  | 109.5    |

|               |       |
|---------------|-------|
| H20A–C20–H20B | 109.5 |
| C19–C20–H20C  | 109.5 |
| H20A–C20–H20C | 109.5 |
| H20B–C20–H20C | 109.5 |
| C15–C16–H16A  | 109.5 |
| C15–C16–H16B  | 109.5 |
| H16A–C16–H16B | 109.5 |
| C15–C16–H16C  | 109.5 |
| H16A–C16–H16C | 109.5 |
| H16B–C16–H16C | 109.5 |
| C14–C13–H13A  | 109.5 |
| C14–C13–H13B  | 109.5 |
| H13A–C13–H13B | 109.5 |
| C14–C13–H13C  | 109.5 |
| H13A–C13–H13C | 109.5 |
| H13B–C13–H13C | 109.5 |
| C36–C41–H41A  | 109.5 |
| C36–C41–H41B  | 109.5 |
| H41A–C41–H41B | 109.5 |
| C36–C41–H41C  | 109.5 |
| H41A–C41–H41C | 109.5 |
| H41B–C41–H41C | 109.5 |
| C21–C22–H22A  | 109.5 |
| C21–C22–H22B  | 109.5 |
| H22A–C22–H22B | 109.5 |
| C21–C22–H22C  | 109.5 |
| H22A–C22–H22C | 109.5 |
| H22B–C22–H22C | 109.5 |
| C17–C18–H18A  | 109.5 |
| C17–C18–H18B  | 109.5 |
| H18A–C18–H18B | 109.5 |
| C17–C18–H18C  | 109.5 |
| H18A–C18–H18C | 109.5 |
| H18B–C18–H18C | 109.5 |

**Table 5. Torsion angles for shelx**

| Atom–Atom–Atom–Atom | Torsion Angle [°] |
|---------------------|-------------------|
| C12–N4–N3–C5        | 176.6(4)          |
| Ir2–N4–N3–C5        | 1.5(5)            |
| C12–N4–N3–C8        | –15.5(6)          |
| Ir2–N4–N3–C8        | 169.4(4)          |
| N4–N3–C5–C4         | 179.4(4)          |
| C8–N3–C5–C4         | 14.9(9)           |
| N4–N3–C5–C6         | –2.9(6)           |
| C8–N3–C5–C6         | –167.5(6)         |
| C24–N1–N2–C29       | –176.3(5)         |
| Ir1–N1–N2–C29       | –1.1(6)           |
| C24–N1–N2–C28       | 0.0(7)            |
| Ir1–N1–N2–C28       | 175.2(4)          |
| N3–C5–C4–C3         | 175.1(5)          |
| C6–C5–C4–C3         | –2.3(7)           |
| N3–C5–C6–C7         | –175.1(4)         |
| C4–C5–C6–C7         | 2.5(7)            |
| N3–C5–C6–Ir2        | 3.1(6)            |
| C4–C5–C6–Ir2        | –179.3(4)         |
| C14–C15–C17–C19     | –2.6(6)           |

|                 |           |
|-----------------|-----------|
| C16–C15–C17–C19 | 176.0(5)  |
| Ir2–C15–C17–C19 | –60.2(4)  |
| C14–C15–C17–C18 | 178.2(5)  |
| C16–C15–C17–C18 | –3.2(9)   |
| Ir2–C15–C17–C18 | 120.6(6)  |
| C14–C15–C17–Ir2 | 57.6(4)   |
| C16–C15–C17–Ir2 | –123.8(6) |
| C5–C6–C7–C2     | –0.8(7)   |
| Ir2–C6–C7–C2    | –178.6(4) |
| C29–C35–C34–C32 | 0.3(7)    |
| Ir1–C35–C34–C32 | 178.2(4)  |
| N3–N4–C12–O2    | 179.4(6)  |
| Ir2–N4–C12–O2   | –6.7(9)   |
| N3–N4–C12–C9    | –1.6(6)   |
| Ir2–N4–C12–C9   | 172.3(4)  |
| N2–N1–C24–O1    | –176.2(6) |
| Ir1–N1–C24–O1   | 9.6(9)    |
| N2–N1–C24–C25   | 5.3(6)    |
| Ir1–N1–C24–C25  | –168.9(4) |
| C14–C21–C19–C17 | 2.3(6)    |

|                 |           |
|-----------------|-----------|
| C22-C21-C19-C17 | -172.9(6) |
| Ir2-C21-C19-C17 | 64.0(4)   |
| C14-C21-C19-C20 | 178.1(5)  |
| C22-C21-C19-C20 | 2.9(10)   |
| Ir2-C21-C19-C20 | -120.2(6) |
| C14-C21-C19-Ir2 | -61.7(4)  |
| C22-C21-C19-Ir2 | 123.1(6)  |
| C15-C17-C19-C21 | 0.2(6)    |
| C18-C17-C19-C21 | 179.4(5)  |
| Ir2-C17-C19-C21 | -63.5(4)  |
| C15-C17-C19-C20 | -175.7(5) |
| C18-C17-C19-C20 | 3.5(9)    |
| Ir2-C17-C19-C20 | 120.6(5)  |
| C15-C17-C19-Ir2 | 63.7(4)   |
| C18-C17-C19-Ir2 | -117.1(6) |
| C35-C34-C32-C31 | -0.7(8)   |
| C35-C34-C32-C33 | -179.5(5) |
| N1-N2-C29-C30   | 178.9(5)  |
| C28-N2-C29-C30  | 3.5(10)   |
| N1-N2-C29-C35   | 0.7(7)    |
| C28-N2-C29-C35  | -174.8(6) |
| C31-C30-C29-N2  | -178.1(5) |
| C31-C30-C29-C35 | 0.0(8)    |
| C34-C35-C29-N2  | 178.3(5)  |
| Ir1-C35-C29-N2  | 0.0(6)    |
| C34-C35-C29-C30 | 0.0(7)    |
| Ir1-C35-C29-C30 | -178.2(4) |
| C5-C4-C3-C2     | 0.4(8)    |
| C19-C21-C14-C15 | -3.9(6)   |
| C22-C21-C14-C15 | 171.5(5)  |
| Ir2-C21-C14-C15 | -65.0(4)  |
| C19-C21-C14-C13 | -179.1(5) |
| C22-C21-C14-C13 | -3.7(9)   |
| Ir2-C21-C14-C13 | 119.7(6)  |
| C19-C21-C14-Ir2 | 61.2(4)   |
| C22-C21-C14-Ir2 | -123.5(6) |
| C17-C15-C14-C21 | 4.0(6)    |
| C16-C15-C14-C21 | -174.7(5) |
| Ir2-C15-C14-C21 | 62.7(4)   |
| C17-C15-C14-C13 | 179.2(5)  |
| C16-C15-C14-C13 | 0.5(9)    |
| Ir2-C15-C14-C13 | -122.2(6) |
| C17-C15-C14-Ir2 | -58.7(4)  |
| C16-C15-C14-Ir2 | 122.7(5)  |
| C36-C37-C38-C39 | 1.4(6)    |
| C23-C37-C38-C39 | 176.4(6)  |
| Ir1-C37-C38-C39 | -62.7(4)  |
| C36-C37-C38-C44 | -179.5(5) |
| C23-C37-C38-C44 | -4.4(9)   |
| Ir1-C37-C38-C44 | 116.4(5)  |
| C36-C37-C38-Ir1 | 64.1(4)   |
| C23-C37-C38-Ir1 | -120.8(6) |
| C6-C7-C2-C3     | -1.0(8)   |
| C6-C7-C2-C1     | 178.4(6)  |
| C4-C3-C2-C7     | 1.2(8)    |
| C4-C3-C2-C1     | -178.1(6) |
| C37-C38-C39-C40 | 1.2(6)    |
| C44-C38-C39-C40 | -177.9(5) |

|                 |           |
|-----------------|-----------|
| Ir1-C38-C39-C40 | -58.0(4)  |
| C37-C38-C39-C43 | -176.0(5) |
| C44-C38-C39-C43 | 4.9(9)    |
| Ir1-C38-C39-C43 | 124.8(6)  |
| C37-C38-C39-Ir1 | 59.2(4)   |
| C44-C38-C39-Ir1 | -119.9(6) |
| C29-C30-C31-C32 | -0.3(8)   |
| C34-C32-C31-C30 | 0.7(8)    |
| C33-C32-C31-C30 | 179.5(6)  |
| C38-C39-C40-C36 | -3.4(6)   |
| C43-C39-C40-C36 | 173.9(5)  |
| Ir1-C39-C40-C36 | -62.7(4)  |
| C38-C39-C40-C42 | -177.5(5) |
| C43-C39-C40-C42 | -0.1(9)   |
| Ir1-C39-C40-C42 | 123.2(6)  |
| C38-C39-C40-Ir1 | 59.3(4)   |
| C43-C39-C40-Ir1 | -123.4(5) |
| O2-C12-C9-C11   | -44.0(8)  |
| N4-C12-C9-C11   | 137.0(5)  |
| O2-C12-C9-C10   | 76.2(7)   |
| N4-C12-C9-C10   | -102.8(5) |
| O2-C12-C9-C8    | -164.7(6) |
| N4-C12-C9-C8    | 16.2(6)   |
| C38-C37-C36-C40 | -3.5(6)   |
| C23-C37-C36-C40 | -178.5(6) |
| Ir1-C37-C36-C40 | 61.2(4)   |
| C38-C37-C36-C41 | 170.6(5)  |
| C23-C37-C36-C41 | -4.4(9)   |
| Ir1-C37-C36-C41 | -124.7(6) |
| C38-C37-C36-Ir1 | -64.7(4)  |
| C23-C37-C36-Ir1 | 120.3(6)  |
| C39-C40-C36-C37 | 4.3(6)    |
| C42-C40-C36-C37 | 178.1(5)  |
| Ir1-C40-C36-C37 | -60.3(4)  |
| C39-C40-C36-C41 | -169.9(5) |
| C42-C40-C36-C41 | 3.9(9)    |
| Ir1-C40-C36-C41 | 125.6(6)  |
| C39-C40-C36-Ir1 | 64.5(4)   |
| C42-C40-C36-Ir1 | -121.7(6) |
| C5-N3-C8-C9     | -170.1(5) |
| N4-N3-C8-C9     | 25.3(6)   |
| C11-C9-C8-N3    | -143.4(5) |
| C12-C9-C8-N3    | -23.5(6)  |
| C10-C9-C8-N3    | 92.0(5)   |
| O1-C24-C25-C26  | -67.2(8)  |
| N1-C24-C25-C26  | 111.2(5)  |
| O1-C24-C25-C27  | 52.7(8)   |
| N1-C24-C25-C27  | -128.9(5) |
| O1-C24-C25-C28  | 173.6(7)  |
| N1-C24-C25-C28  | -8.1(6)   |
| C29-N2-C28-C25  | 170.4(6)  |
| N1-N2-C28-C25   | -5.1(7)   |
| C26-C25-C28-N2  | -108.2(6) |
| C27-C25-C28-N2  | 126.0(5)  |
| C24-C25-C28-N2  | 7.5(6)    |
| C34-C32-C33-F3  | -128.6(7) |
| C31-C32-C33-F3  | 52.5(9)   |
| C34-C32-C33-F1  | 112.2(7)  |



|                |           |
|----------------|-----------|
| C31-C32-C33-F1 | -66.6(9)  |
| C34-C32-C33-F2 | -7.2(10)  |
| C31-C32-C33-F2 | 174.0(6)  |
| C7-C2-C1-F4    | 1.1(12)   |
| C3-C2-C1-F4    | -179.6(8) |

|             |           |
|-------------|-----------|
| C7-C2-C1-F5 | 125.2(9)  |
| C3-C2-C1-F5 | -55.4(11) |
| C7-C2-C1-F6 | -120.3(8) |
| C3-C2-C1-F6 | 59.1(11)  |

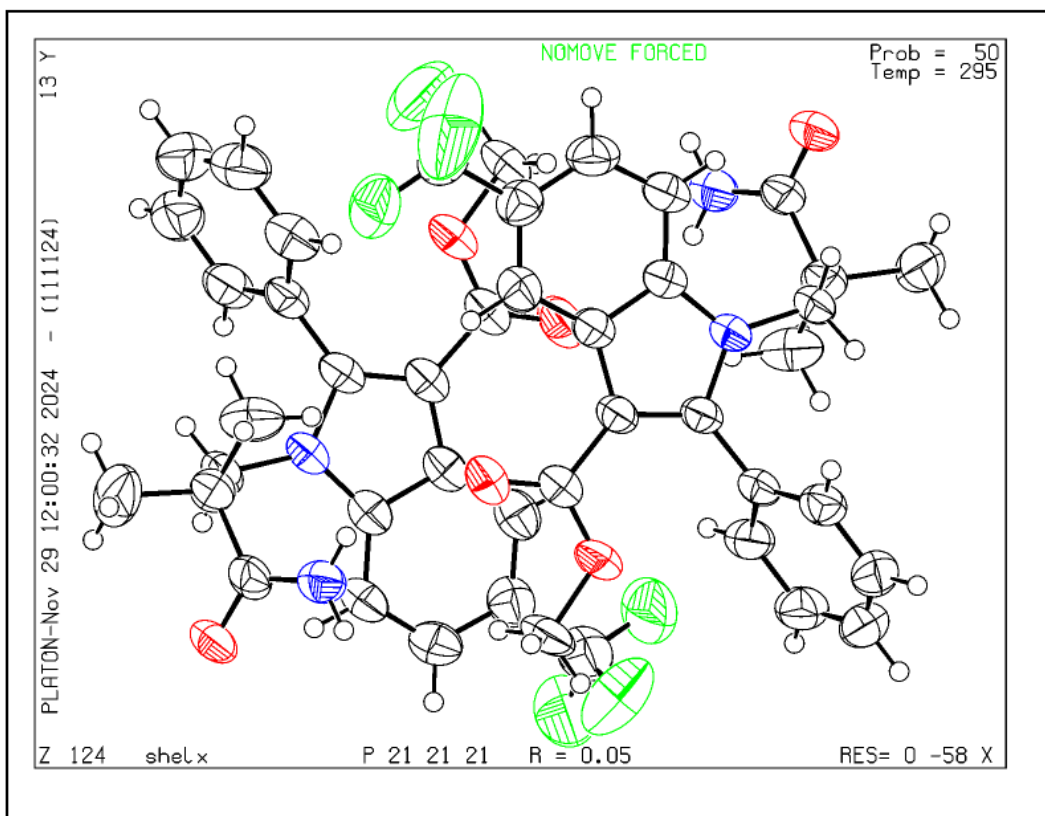

The diffractometer was equipped with a low temperature device and used  $\text{MoK}\alpha$  radiation ( $\lambda = 0.71073 \text{ \AA}$ ). All data were integrated with SAINT and a MULTI-SCAN absorption correction using SADABS was applied. The structure was solved by direct methods using SIR-92 and refined by full-matrix least-squares methods against  $F^2$  by SHELXL-2018/3. All non-hydrogen atoms were refined with anisotropic displacement parameters. All C-bound hydrogen atoms were refined isotropic on calculated positions using a riding model with their  $U_{\text{iso}}$  values constrained to 1.5 times the  $U_{\text{eq}}$  of their pivot atoms for terminal  $\text{sp}^3$  carbon atoms and 1.2 times for all other carbon atoms. Crystallographic data for the structures reported here have been deposited with the Cambridge Crystallographic Data Centre. CCDC 2360016 contain the supplementary crystallographic data for this paper.

**Table 1. Crystal data and structure refinement for shelx**

|                                            |                                                            |
|--------------------------------------------|------------------------------------------------------------|
| CCDC number                                | 2360016                                                    |
| Empirical formula                          | $\text{C}_{22}\text{H}_{21}\text{F}_3\text{N}_2\text{O}_3$ |
| Formula weight                             | 418.41                                                     |
| Temperature [K]                            | 295(2)                                                     |
| Crystal system                             | orthorhombic                                               |
| Space group (number)                       | $P2_12_12_1$ (19)                                          |
| $a$ [ $\text{\AA}$ ]                       | 12.159(2)                                                  |
| $b$ [ $\text{\AA}$ ]                       | 15.314(3)                                                  |
| $c$ [ $\text{\AA}$ ]                       | 22.569(4)                                                  |
| $\alpha$ [ $^\circ$ ]                      | 90                                                         |
| $\beta$ [ $^\circ$ ]                       | 90                                                         |
| $\gamma$ [ $^\circ$ ]                      | 90                                                         |
| Volume [ $\text{\AA}^3$ ]                  | 4202.8(13)                                                 |
| $Z$                                        | 8                                                          |
| $\rho_{\text{calc}}$ [ $\text{gcm}^{-3}$ ] | 1.323                                                      |
| $\mu$ [ $\text{mm}^{-1}$ ]                 | 0.106                                                      |
| $F(000)$                                   | 1744                                                       |

|                                             |                                                     |
|---------------------------------------------|-----------------------------------------------------|
| Crystal size [mm <sup>3</sup> ]             | 0.340×0.220×0.200                                   |
| Crystal colour                              | colourless                                          |
| Crystal shape                               | block                                               |
| Radiation                                   | MoK <sub>α</sub> (λ=0.71073 Å)                      |
| 2θ range [°]                                | 3.80 to 52.00 (0.81 Å)                              |
|                                             | -14 ≤ h ≤ 14                                        |
| Index ranges                                | -18 ≤ k ≤ 18                                        |
|                                             | -27 ≤ l ≤ 24                                        |
| Reflections collected                       | 39452                                               |
|                                             | 8216                                                |
| Independent reflections                     | R <sub>int</sub> = 0.0442                           |
|                                             | R <sub>sigma</sub> = 0.0379                         |
| Completeness to<br>θ = 25.242°              | 99.8 %                                              |
| Data / Restraints / Parameters              | 8216/0/543                                          |
| Absorption correction                       | 0.7026/0.7457                                       |
| T <sub>min</sub> /T <sub>max</sub> (method) | (MULTI-SCAN)                                        |
| Goodness-of-fit on F <sup>2</sup>           | 1.021                                               |
| Final R indexes<br>[I ≥ 2σ(I)]              | R <sub>1</sub> = 0.0477<br>wR <sub>2</sub> = 0.1071 |
| Final R indexes<br>[all data]               | R <sub>1</sub> = 0.0778<br>wR <sub>2</sub> = 0.1242 |
| Largest peak/hole [eÅ <sup>-3</sup> ]       | 0.20/-0.22                                          |
| Flack X parameter                           | -0.1(3)                                             |

**Table 2. Atomic coordinates and U<sub>eq</sub> [Å<sup>2</sup>] for shelx**

| Atom | x          | y         | z           | U <sub>eq</sub> |
|------|------------|-----------|-------------|-----------------|
| C1   | 0.1200(3)  | 0.8407(2) | 0.52082(16) | 0.0496(8)       |
| C2   | 0.2151(3)  | 0.8472(3) | 0.48683(17) | 0.0580(10)      |
| H2   | 0.283752   | 0.833691  | 0.502505    | 0.070           |
| C3   | 0.2034(3)  | 0.8742(3) | 0.42944(18) | 0.0638(11)      |
| H3   | 0.265512   | 0.879181  | 0.405618    | 0.077           |
| C4   | 0.1004(4)  | 0.8944(3) | 0.40578(17) | 0.0625(10)      |
| C5   | 0.0053(3)  | 0.8888(3) | 0.43953(17) | 0.0585(10)      |
| H5   | -0.062790  | 0.902999  | 0.423491    | 0.070           |
| C6   | 0.0148(3)  | 0.8611(2) | 0.49834(17) | 0.0513(9)       |
| C7   | -0.0628(3) | 0.8438(2) | 0.54481(17) | 0.0510(9)       |
| C8   | -0.1820(3) | 0.8574(3) | 0.54116(19) | 0.0551(9)       |
| C9   | -0.3493(3) | 0.8522(3) | 0.5952(2)   | 0.0769(13)      |
| H9A  | -0.384613  | 0.822875  | 0.562818    | 0.115           |
| H9B  | -0.365304  | 0.913567  | 0.593304    | 0.115           |
| H9C  | -0.376126  | 0.828997  | 0.632003    | 0.115           |
| C10  | -0.0044(3) | 0.8117(2) | 0.59289(17) | 0.0494(9)       |
| C11  | -0.0429(3) | 0.7719(2) | 0.64891(16) | 0.0506(9)       |
| C12  | -0.0932(3) | 0.8200(3) | 0.6930(2)   | 0.0670(11)      |
| H12  | -0.101857  | 0.879994  | 0.688519    | 0.080           |
| C13  | -0.1311(4) | 0.7790(4) | 0.7440(2)   | 0.0801(14)      |
| H13  | -0.164841  | 0.811445  | 0.773747    | 0.096           |

|      |            |           |             |            |
|------|------------|-----------|-------------|------------|
| C14  | -0.1187(4) | 0.6913(4) | 0.7503(2)   | 0.0889(15) |
| H14  | -0.143929  | 0.664165  | 0.784591    | 0.107      |
| C15  | -0.0697(4) | 0.6426(3) | 0.7072(2)   | 0.0829(14) |
| H15  | -0.062045  | 0.582638  | 0.712015    | 0.099      |
| C16  | -0.0318(3) | 0.6824(3) | 0.6568(2)   | 0.0657(11) |
| H16  | 0.001808   | 0.648976  | 0.627477    | 0.079      |
| C17  | 0.1975(3)  | 0.7915(2) | 0.61948(18) | 0.0545(9)  |
| H17A | 0.254703   | 0.761423  | 0.597551    | 0.065      |
| H17B | 0.170437   | 0.751488  | 0.649447    | 0.065      |
| C18  | 0.2495(3)  | 0.8705(3) | 0.65094(17) | 0.0572(10) |
| C19  | 0.1614(4)  | 0.9275(3) | 0.6806(2)   | 0.0746(13) |
| H19A | 0.112406   | 0.950036  | 0.650925    | 0.112      |
| H19B | 0.120548   | 0.893008  | 0.708441    | 0.112      |
| H19C | 0.196155   | 0.975176  | 0.700904    | 0.112      |
| C20  | 0.3282(4)  | 0.8343(4) | 0.6982(2)   | 0.0961(18) |
| H20A | 0.383107   | 0.798691  | 0.679439    | 0.144      |
| H20B | 0.363120   | 0.881832  | 0.718504    | 0.144      |
| H20C | 0.287513   | 0.799663  | 0.726041    | 0.144      |
| C21  | 0.3197(3)  | 0.9219(3) | 0.60625(17) | 0.0539(9)  |
| C22  | 0.0946(4)  | 0.9215(4) | 0.3425(2)   | 0.0790(13) |
| C23  | -0.1780(3) | 1.1091(2) | 0.56607(15) | 0.0462(8)  |
| C24  | -0.2852(3) | 1.1286(2) | 0.54828(15) | 0.0469(8)  |
| C25  | -0.3738(3) | 1.1275(3) | 0.58723(17) | 0.0595(10) |
| H25  | -0.444489  | 1.141830  | 0.574830    | 0.071      |
| C26  | -0.3522(3) | 1.1045(3) | 0.64478(17) | 0.0649(11) |
| H26  | -0.409655  | 1.102717  | 0.671935    | 0.078      |
| C27  | -0.2455(3) | 1.0834(3) | 0.66371(16) | 0.0569(10) |
| C28  | -0.1580(3) | 1.0858(2) | 0.62501(17) | 0.0549(9)  |
| H28  | -0.087245  | 1.072276  | 0.637757    | 0.066      |
| C29  | 0.0113(3)  | 1.1114(2) | 0.51601(17) | 0.0510(9)  |
| C30  | 0.1761(3)  | 1.1226(3) | 0.4600(2)   | 0.0702(12) |
| H30A | 0.195690   | 1.064450  | 0.471814    | 0.105      |
| H30B | 0.213173   | 1.164024  | 0.484882    | 0.105      |
| H30C | 0.197632   | 1.131765  | 0.419495    | 0.105      |
| C31  | -0.1748(3) | 1.1499(2) | 0.46895(15) | 0.0440(8)  |
| C32  | -0.1442(3) | 1.1800(2) | 0.40883(15) | 0.0458(8)  |
| C33  | -0.1021(3) | 1.1228(3) | 0.36743(17) | 0.0597(10) |
| H33  | -0.095105  | 1.063934  | 0.376768    | 0.072      |
| C34  | -0.0702(4) | 1.1524(3) | 0.31212(18) | 0.0705(12) |
| H34  | -0.041222  | 1.113380  | 0.284671    | 0.085      |
| C35  | -0.0811(4) | 1.2383(3) | 0.29764(19) | 0.0726(12) |
| H35  | -0.059796  | 1.257793  | 0.260338    | 0.087      |
| C36  | -0.1234(3) | 1.2959(3) | 0.33814(19) | 0.0671(11) |
| H36  | -0.130570  | 1.354646  | 0.328335    | 0.081      |
| C37  | -0.1553(3) | 1.2670(3) | 0.39343(17) | 0.0541(9)  |
| H37  | -0.184503  | 1.306334  | 0.420583    | 0.065      |
| C38  | -0.3797(3) | 1.1723(2) | 0.45242(16) | 0.0514(9)  |

|      |            |             |             |            |
|------|------------|-------------|-------------|------------|
| H38A | -0.357584  | 1.211500    | 0.420851    | 0.062      |
| H38B | -0.432094  | 1.203287    | 0.477038    | 0.062      |
| C39  | -0.4388(3) | 1.0929(3)   | 0.42431(16) | 0.0581(10) |
| C40  | -0.3589(4) | 1.0357(3)   | 0.39080(18) | 0.0743(13) |
| H40A | -0.321354  | 1.070045    | 0.361521    | 0.111      |
| H40B | -0.306314  | 1.011507    | 0.417924    | 0.111      |
| H40C | -0.398355  | 0.989317    | 0.371674    | 0.111      |
| C41  | -0.5252(4) | 1.1328(4)   | 0.3817(2)   | 0.0946(18) |
| H41A | -0.575129  | 1.168842    | 0.403773    | 0.142      |
| H41B | -0.488609  | 1.167506    | 0.352285    | 0.142      |
| H41C | -0.565381  | 1.086701    | 0.362657    | 0.142      |
| C42  | -0.2278(5) | 1.0609(4)   | 0.72676(19) | 0.0779(13) |
| C43  | -0.1086(3) | 1.1222(2)   | 0.51531(15) | 0.0459(8)  |
| C44  | -0.5035(3) | 1.0449(3)   | 0.47231(17) | 0.0533(9)  |
| N1   | 0.1070(2)  | 0.81116(19) | 0.57859(13) | 0.0485(7)  |
| N2   | 0.2851(3)  | 0.9986(2)   | 0.58733(15) | 0.0629(9)  |
| H2A  | 0.323164   | 1.027252    | 0.561779    | 0.075      |
| H2B  | 0.224454   | 1.019964    | 0.600551    | 0.075      |
| N3   | -0.2826(2) | 1.15220(18) | 0.48841(13) | 0.0462(7)  |
| N4   | -0.4720(3) | 0.9651(2)   | 0.48812(16) | 0.0660(9)  |
| H4A  | -0.507899  | 0.937165    | 0.514946    | 0.079      |
| H4B  | -0.415817  | 0.941392    | 0.471512    | 0.079      |
| O1   | 0.4064(2)  | 0.88967(19) | 0.58799(14) | 0.0711(8)  |
| O2   | -0.2291(2) | 0.8830(2)   | 0.49690(13) | 0.0742(8)  |
| O3   | -0.2318(2) | 0.8391(2)   | 0.59158(14) | 0.0711(8)  |
| O4   | -0.5839(2) | 1.08056(19) | 0.49535(13) | 0.0681(8)  |
| O5   | 0.0628(2)  | 1.0865(2)   | 0.55849(13) | 0.0733(8)  |
| O6   | 0.0583(2)  | 1.1341(2)   | 0.46548(12) | 0.0637(7)  |
| F1   | -0.0050(3) | 0.9254(3)   | 0.32043(13) | 0.1242(13) |
| F2   | 0.1343(4)  | 1.0011(3)   | 0.33376(14) | 0.1402(15) |
| F3   | 0.1527(3)  | 0.8704(3)   | 0.30767(12) | 0.1329(14) |
| F4   | -0.1294(3) | 1.0298(2)   | 0.73877(11) | 0.1029(10) |
| F5   | -0.2924(4) | 0.9955(3)   | 0.74453(16) | 0.1550(18) |
| F6   | -0.2468(5) | 1.1227(3)   | 0.76269(13) | 0.186(3)   |

$U_{eq}$  is defined as 1/3 of the trace of the orthogonalized  $U_{ij}$  tensor.

**Table 3. Anisotropic displacement parameters [ $\text{\AA}^2$ ] for shelx.**

The anisotropic displacement factor exponent takes the form:  $-2\pi^2 [ h^2(a^*)^2U_{11} + k^2(b^*)^2U_{22} + \dots + 2hka^*b^*U_{12} ]$

| Atom | $U_{11}$   | $U_{22}$ | $U_{33}$ | $U_{23}$    | $U_{13}$    | $U_{12}$   |
|------|------------|----------|----------|-------------|-------------|------------|
| C1   | 0.042(2)   | 0.051(2) | 0.057(2) | -0.0081(17) | -0.0030(17) | 0.0048(17) |
| C2   | 0.038(2)   | 0.067(2) | 0.068(2) | -0.010(2)   | 0.0013(18)  | 0.0086(18) |
| C3   | 0.055(2)   | 0.071(3) | 0.066(2) | -0.010(2)   | 0.012(2)    | 0.005(2)   |
| C4   | 0.064(3)   | 0.066(3) | 0.057(2) | -0.0091(19) | -0.002(2)   | 0.011(2)   |
| C5   | 0.054(2)   | 0.056(2) | 0.066(2) | -0.0104(19) | -0.0070(19) | 0.0078(19) |
| C6   | 0.042(2)   | 0.048(2) | 0.064(2) | -0.0073(18) | -0.0027(17) | 0.0058(16) |
| C7   | 0.0363(18) | 0.049(2) | 0.068(2) | -0.0046(18) | -0.0032(17) | 0.0036(16) |
| C8   | 0.039(2)   | 0.053(2) | 0.074(3) | -0.0062(19) | -0.004(2)   | 0.0072(17) |
| C9   | 0.034(2)   | 0.097(4) | 0.100(3) | 0.011(3)    | 0.004(2)    | 0.015(2)   |

|     |            |            |            |             |             |             |
|-----|------------|------------|------------|-------------|-------------|-------------|
| C10 | 0.0324(18) | 0.0471(19) | 0.069(2)   | -0.0048(17) | 0.0035(17)  | 0.0023(15)  |
| C11 | 0.0323(18) | 0.055(2)   | 0.065(2)   | -0.0014(18) | -0.0016(17) | -0.0013(16) |
| C12 | 0.051(2)   | 0.074(3)   | 0.076(3)   | -0.014(2)   | 0.001(2)    | 0.000(2)    |
| C13 | 0.059(3)   | 0.116(4)   | 0.066(3)   | -0.017(3)   | 0.007(2)    | -0.007(3)   |
| C14 | 0.068(3)   | 0.115(5)   | 0.084(3)   | 0.021(3)    | 0.006(3)    | -0.011(3)   |
| C15 | 0.066(3)   | 0.078(3)   | 0.105(4)   | 0.023(3)    | 0.010(3)    | 0.001(3)    |
| C16 | 0.044(2)   | 0.063(3)   | 0.090(3)   | 0.003(2)    | 0.007(2)    | 0.0030(19)  |
| C17 | 0.0329(19) | 0.058(2)   | 0.072(2)   | 0.0077(19)  | -0.0047(17) | 0.0022(16)  |
| C18 | 0.041(2)   | 0.069(2)   | 0.061(2)   | 0.0091(19)  | -0.0059(17) | -0.0106(18) |
| C19 | 0.067(3)   | 0.083(3)   | 0.074(3)   | -0.015(2)   | 0.017(2)    | -0.023(2)   |
| C20 | 0.078(3)   | 0.122(4)   | 0.088(3)   | 0.038(3)    | -0.038(3)   | -0.033(3)   |
| C21 | 0.034(2)   | 0.060(2)   | 0.068(2)   | 0.0066(19)  | -0.0092(17) | -0.0080(18) |
| C22 | 0.080(3)   | 0.094(4)   | 0.064(3)   | -0.018(3)   | 0.003(3)    | 0.018(3)    |
| C23 | 0.0384(19) | 0.0461(19) | 0.054(2)   | -0.0003(16) | 0.0021(15)  | 0.0013(15)  |
| C24 | 0.0384(19) | 0.051(2)   | 0.0518(19) | -0.0012(16) | 0.0051(16)  | 0.0009(16)  |
| C25 | 0.041(2)   | 0.077(3)   | 0.061(2)   | 0.002(2)    | 0.0072(18)  | 0.0047(19)  |
| C26 | 0.058(3)   | 0.080(3)   | 0.057(2)   | -0.002(2)   | 0.0167(19)  | 0.001(2)    |
| C27 | 0.063(3)   | 0.057(2)   | 0.051(2)   | -0.0022(18) | 0.0033(18)  | 0.0024(19)  |
| C28 | 0.049(2)   | 0.058(2)   | 0.057(2)   | -0.0020(18) | -0.0038(18) | 0.0017(18)  |
| C29 | 0.038(2)   | 0.055(2)   | 0.060(2)   | -0.0019(18) | 0.0003(18)  | 0.0040(17)  |
| C30 | 0.0297(19) | 0.096(3)   | 0.085(3)   | -0.006(3)   | 0.0069(19)  | 0.004(2)    |
| C31 | 0.0325(17) | 0.0456(19) | 0.054(2)   | 0.0013(16)  | 0.0051(15)  | 0.0004(14)  |
| C32 | 0.0292(17) | 0.054(2)   | 0.055(2)   | 0.0030(17)  | 0.0012(15)  | -0.0020(15) |
| C33 | 0.049(2)   | 0.066(2)   | 0.064(2)   | 0.002(2)    | 0.0125(19)  | 0.0015(19)  |
| C34 | 0.059(3)   | 0.095(3)   | 0.057(2)   | -0.002(2)   | 0.012(2)    | 0.003(2)    |
| C35 | 0.063(3)   | 0.098(4)   | 0.057(2)   | 0.019(3)    | 0.004(2)    | -0.008(2)   |
| C36 | 0.056(3)   | 0.070(3)   | 0.075(3)   | 0.022(2)    | 0.000(2)    | -0.010(2)   |
| C37 | 0.042(2)   | 0.057(2)   | 0.064(2)   | 0.0018(18)  | 0.0027(17)  | -0.0052(17) |
| C38 | 0.0316(18) | 0.060(2)   | 0.063(2)   | 0.0115(17)  | 0.0024(16)  | 0.0014(16)  |
| C39 | 0.0384(19) | 0.080(3)   | 0.056(2)   | 0.008(2)    | -0.0034(17) | -0.0115(19) |
| C40 | 0.067(3)   | 0.090(3)   | 0.065(3)   | -0.016(2)   | 0.017(2)    | -0.023(2)   |
| C41 | 0.054(3)   | 0.157(5)   | 0.073(3)   | 0.044(3)    | -0.016(2)   | -0.024(3)   |
| C42 | 0.085(4)   | 0.093(3)   | 0.055(3)   | 0.005(3)    | 0.006(2)    | 0.008(3)    |
| C43 | 0.0335(18) | 0.0488(19) | 0.0553(19) | 0.0024(16)  | 0.0029(15)  | 0.0023(15)  |
| C44 | 0.034(2)   | 0.069(3)   | 0.058(2)   | 0.0057(19)  | -0.0017(17) | -0.0076(18) |
| N1  | 0.0311(15) | 0.0533(17) | 0.0611(18) | -0.0031(14) | -0.0023(13) | 0.0041(13)  |
| N2  | 0.0495(19) | 0.062(2)   | 0.077(2)   | 0.0129(17)  | 0.0100(17)  | 0.0011(16)  |
| N3  | 0.0314(15) | 0.0536(16) | 0.0537(16) | 0.0034(13)  | 0.0029(13)  | 0.0012(13)  |
| N4  | 0.0498(19) | 0.069(2)   | 0.079(2)   | 0.0153(18)  | 0.0124(17)  | 0.0048(16)  |
| O1  | 0.0342(14) | 0.0784(19) | 0.101(2)   | 0.0233(17)  | 0.0079(14)  | 0.0100(13)  |
| O2  | 0.0465(16) | 0.096(2)   | 0.0805(19) | 0.0029(17)  | -0.0091(15) | 0.0154(16)  |
| O3  | 0.0333(13) | 0.095(2)   | 0.0848(19) | 0.0057(16)  | 0.0001(14)  | 0.0111(14)  |
| O4  | 0.0383(15) | 0.0794(18) | 0.0865(19) | 0.0186(16)  | 0.0114(13)  | 0.0012(13)  |
| O5  | 0.0445(15) | 0.102(2)   | 0.0738(18) | 0.0135(17)  | -0.0065(14) | 0.0149(16)  |
| O6  | 0.0283(12) | 0.093(2)   | 0.0702(17) | 0.0069(15)  | 0.0009(12)  | 0.0004(13)  |
| F1  | 0.100(2)   | 0.198(4)   | 0.0749(18) | 0.009(2)    | -0.0179(17) | 0.030(2)    |
| F2  | 0.215(4)   | 0.127(3)   | 0.0789(19) | 0.021(2)    | 0.002(2)    | -0.028(3)   |

|    |          |          |            |            |             |           |
|----|----------|----------|------------|------------|-------------|-----------|
| F3 | 0.140(3) | 0.194(4) | 0.0646(16) | -0.033(2)  | 0.0024(18)  | 0.071(3)  |
| F4 | 0.110(2) | 0.134(3) | 0.0644(15) | 0.0136(16) | -0.0122(16) | 0.019(2)  |
| F5 | 0.151(3) | 0.210(4) | 0.104(2)   | 0.078(3)   | -0.016(2)   | -0.061(3) |
| F6 | 0.345(7) | 0.153(3) | 0.0593(17) | -0.031(2)  | -0.017(3)   | 0.121(4)  |

**Table 4. Bond lengths and angles for shelx**

| Atom-Atom | Length [Å] |          |          |
|-----------|------------|----------|----------|
| C1-N1     | 1.389(5)   | C19-H19B | 0.9600   |
| C1-C2     | 1.391(5)   | C19-H19C | 0.9600   |
| C1-C6     | 1.411(5)   | C20-H20A | 0.9600   |
| C2-C3     | 1.367(5)   | C20-H20B | 0.9600   |
| C2-H2     | 0.9300     | C20-H20C | 0.9600   |
| C3-C4     | 1.397(6)   | C21-O1   | 1.235(5) |
| C3-H3     | 0.9300     | C21-N2   | 1.319(5) |
| C4-C5     | 1.387(6)   | C22-F1   | 1.310(6) |
| C4-C22    | 1.490(6)   | C22-F3   | 1.315(5) |
| C5-C6     | 1.398(5)   | C22-F2   | 1.326(6) |
| C5-H5     | 0.9300     | C23-C24  | 1.397(5) |
| C6-C7     | 1.436(5)   | C23-C28  | 1.399(5) |
| C7-C10    | 1.387(5)   | C23-C43  | 1.437(5) |
| C7-C8     | 1.465(5)   | C24-C25  | 1.390(5) |
| C8-O2     | 1.217(5)   | C24-N3   | 1.399(4) |
| C8-O3     | 1.319(5)   | C25-C26  | 1.372(5) |
| C9-O3     | 1.445(4)   | C25-H25  | 0.9300   |
| C9-H9A    | 0.9600     | C26-C27  | 1.403(6) |
| C9-H9B    | 0.9600     | C26-H26  | 0.9300   |
| C9-H9C    | 0.9600     | C27-C28  | 1.377(5) |
| C10-N1    | 1.393(4)   | C27-C42  | 1.480(6) |
| C10-C11   | 1.480(5)   | C28-H28  | 0.9300   |
| C11-C12   | 1.382(5)   | C29-O5   | 1.207(4) |
| C11-C16   | 1.389(5)   | C29-O6   | 1.322(5) |
| C12-C13   | 1.391(7)   | C29-C43  | 1.468(5) |
| C12-H12   | 0.9300     | C30-O6   | 1.449(4) |
| C13-C14   | 1.358(7)   | C30-H30A | 0.9600   |
| C13-H13   | 0.9300     | C30-H30B | 0.9600   |
| C14-C15   | 1.363(7)   | C30-H30C | 0.9600   |
| C14-H14   | 0.9300     | C31-N3   | 1.384(4) |
| C15-C16   | 1.371(6)   | C31-C43  | 1.386(5) |
| C15-H15   | 0.9300     | C31-C32  | 1.481(5) |
| C16-H16   | 0.9300     | C32-C33  | 1.380(5) |
| C17-N1    | 1.467(4)   | C32-C37  | 1.383(5) |
| C17-C18   | 1.539(5)   | C33-C34  | 1.383(5) |
| C17-H17A  | 0.9700     | C33-H33  | 0.9300   |
| C17-H17B  | 0.9700     | C34-C35  | 1.362(7) |
| C18-C19   | 1.535(6)   | C34-H34  | 0.9300   |
| C18-C20   | 1.536(6)   | C35-C36  | 1.371(6) |
| C18-C21   | 1.537(5)   | C35-H35  | 0.9300   |
| C19-H19A  | 0.9600     | C36-C37  | 1.380(5) |
|           |            | C36-H36  | 0.9300   |

|                    |           |
|--------------------|-----------|
| C37–H37            | 0.9300    |
| C38–N3             | 1.465(4)  |
| C38–C39            | 1.548(5)  |
| C38–H38A           | 0.9700    |
| C38–H38B           | 0.9700    |
| C39–C40            | 1.511(6)  |
| C39–C44            | 1.528(5)  |
| C39–C41            | 1.549(6)  |
| C40–H40A           | 0.9600    |
| C40–H40B           | 0.9600    |
| C40–H40C           | 0.9600    |
| C41–H41A           | 0.9600    |
| C41–H41B           | 0.9600    |
| C41–H41C           | 0.9600    |
| C42–F6             | 1.267(6)  |
| C42–F4             | 1.316(6)  |
| C42–F5             | 1.335(6)  |
| C44–O4             | 1.234(4)  |
| C44–N4             | 1.329(5)  |
| N2–H2A             | 0.8600    |
| N2–H2B             | 0.8600    |
| N4–H4A             | 0.8600    |
| N4–H4B             | 0.8600    |
|                    |           |
| Atom–Atom–<br>Atom | Angle [°] |
| N1–C1–C2           | 129.5(3)  |
| N1–C1–C6           | 107.9(3)  |
| C2–C1–C6           | 122.6(3)  |
| C3–C2–C1           | 117.3(4)  |
| C3–C2–H2           | 121.4     |
| C1–C2–H2           | 121.4     |
| C2–C3–C4           | 121.5(4)  |
| C2–C3–H3           | 119.3     |
| C4–C3–H3           | 119.3     |
| C5–C4–C3           | 121.6(4)  |
| C5–C4–C22          | 120.3(4)  |
| C3–C4–C22          | 118.1(4)  |
| C4–C5–C6           | 118.1(4)  |
| C4–C5–H5           | 120.9     |
| C6–C5–H5           | 120.9     |
| C5–C6–C1           | 118.9(4)  |
| C5–C6–C7           | 134.0(3)  |
| C1–C6–C7           | 107.0(3)  |
| C10–C7–C6          | 107.5(3)  |
| C10–C7–C8          | 126.9(4)  |
| C6–C7–C8           | 125.6(4)  |

|                   |          |
|-------------------|----------|
| O2–C8–O3          | 124.0(3) |
| O2–C8–C7          | 123.9(4) |
| O3–C8–C7          | 112.0(3) |
| O3–C9–H9A         | 109.5    |
| O3–C9–H9B         | 109.5    |
| H9A–C9–H9B        | 109.5    |
| O3–C9–H9C         | 109.5    |
| H9A–C9–H9C        | 109.5    |
| H9B–C9–H9C        | 109.5    |
| C7–C10–N1         | 108.6(3) |
| C7–C10–C11        | 130.7(3) |
| N1–C10–C11        | 120.2(3) |
| C12–C11–C16       | 118.5(4) |
| C12–C11–C10       | 122.4(4) |
| C16–C11–C10       | 119.0(4) |
| C11–C12–C13       | 120.1(4) |
| C11–C12–H12       | 119.9    |
| C13–C12–H12       | 119.9    |
| C14–C13–C12       | 119.8(5) |
| C14–C13–H13       | 120.1    |
| C12–C13–H13       | 120.1    |
| C13–C14–C15       | 121.0(5) |
| C13–C14–H14       | 119.5    |
| C15–C14–H14       | 119.5    |
| C14–C15–C16       | 119.8(5) |
| C14–C15–H15       | 120.1    |
| C16–C15–H15       | 120.1    |
| C15–C16–C11       | 120.7(4) |
| C15–C16–H16       | 119.6    |
| C11–C16–H16       | 119.6    |
| N1–C17–C18        | 115.9(3) |
| N1–C17–H17A       | 108.3    |
| C18–C17–H17A      | 108.3    |
| N1–C17–H17B       | 108.3    |
| C18–C17–H17B      | 108.3    |
| H17A–C17–<br>H17B | 107.4    |
| C19–C18–C20       | 109.8(4) |
| C19–C18–C21       | 112.5(3) |
| C20–C18–C21       | 107.1(3) |
| C19–C18–C17       | 111.2(3) |
| C20–C18–C17       | 107.0(4) |
| C21–C18–C17       | 109.1(3) |
| C18–C19–H19A      | 109.5    |
| C18–C19–H19B      | 109.5    |
| H19A–C19–<br>H19B | 109.5    |



|               |          |
|---------------|----------|
| C18-C19-H19C  | 109.5    |
| H19A-C19-H19C | 109.5    |
| H19B-C19-H19C | 109.5    |
| C18-C20-H20A  | 109.5    |
| C18-C20-H20B  | 109.5    |
| H20A-C20-H20B | 109.5    |
| C18-C20-H20C  | 109.5    |
| H20A-C20-H20C | 109.5    |
| H20B-C20-H20C | 109.5    |
| O1-C21-N2     | 121.3(4) |
| O1-C21-C18    | 119.3(4) |
| N2-C21-C18    | 119.4(3) |
| F1-C22-F3     | 107.3(4) |
| F1-C22-F2     | 103.8(5) |
| F3-C22-F2     | 105.2(5) |
| F1-C22-C4     | 114.9(4) |
| F3-C22-C4     | 112.4(4) |
| F2-C22-C4     | 112.4(4) |
| C24-C23-C28   | 119.4(3) |
| C24-C23-C43   | 106.8(3) |
| C28-C23-C43   | 133.8(3) |
| C25-C24-C23   | 122.6(3) |
| C25-C24-N3    | 129.1(3) |
| C23-C24-N3    | 108.2(3) |
| C26-C25-C24   | 117.0(4) |
| C26-C25-H25   | 121.5    |
| C24-C25-H25   | 121.5    |
| C25-C26-C27   | 121.7(4) |
| C25-C26-H26   | 119.2    |
| C27-C26-H26   | 119.2    |
| C28-C27-C26   | 121.0(3) |
| C28-C27-C42   | 120.2(4) |
| C26-C27-C42   | 118.7(4) |
| C27-C28-C23   | 118.4(3) |
| C27-C28-H28   | 120.8    |
| C23-C28-H28   | 120.8    |
| O5-C29-O6     | 123.0(3) |
| O5-C29-C43    | 124.0(4) |
| O6-C29-C43    | 113.0(3) |
| O6-C30-H30A   | 109.5    |
| O6-C30-H30B   | 109.5    |
| H30A-C30-     | 109.5    |

|               |          |
|---------------|----------|
| H30B          |          |
| O6-C30-H30C   | 109.5    |
| H30A-C30-H30C | 109.5    |
| H30B-C30-H30C | 109.5    |
| N3-C31-C43    | 108.6(3) |
| N3-C31-C32    | 121.4(3) |
| C43-C31-C32   | 129.9(3) |
| C33-C32-C37   | 118.5(3) |
| C33-C32-C31   | 121.0(3) |
| C37-C32-C31   | 120.4(3) |
| C32-C33-C34   | 120.5(4) |
| C32-C33-H33   | 119.8    |
| C34-C33-H33   | 119.8    |
| C35-C34-C33   | 120.4(4) |
| C35-C34-H34   | 119.8    |
| C33-C34-H34   | 119.8    |
| C34-C35-C36   | 119.9(4) |
| C34-C35-H35   | 120.1    |
| C36-C35-H35   | 120.1    |
| C35-C36-C37   | 120.1(4) |
| C35-C36-H36   | 120.0    |
| C37-C36-H36   | 120.0    |
| C36-C37-C32   | 120.6(4) |
| C36-C37-H37   | 119.7    |
| C32-C37-H37   | 119.7    |
| N3-C38-C39    | 115.9(3) |
| N3-C38-H38A   | 108.3    |
| C39-C38-H38A  | 108.3    |
| N3-C38-H38B   | 108.3    |
| C39-C38-H38B  | 108.3    |
| H38A-C38-H38B | 107.4    |
| C40-C39-C44   | 114.0(4) |
| C40-C39-C38   | 111.2(3) |
| C44-C39-C38   | 109.1(3) |
| C40-C39-C41   | 110.7(4) |
| C44-C39-C41   | 106.3(3) |
| C38-C39-C41   | 105.1(4) |
| C39-C40-H40A  | 109.5    |
| C39-C40-H40B  | 109.5    |
| H40A-C40-H40B | 109.5    |
| C39-C40-H40C  | 109.5    |
| H40A-C40-H40C | 109.5    |

|                   |          |
|-------------------|----------|
| H40B–C40–<br>H40C | 109.5    |
| C39–C41–H41A      | 109.5    |
| C39–C41–H41B      | 109.5    |
| H41A–C41–<br>H41B | 109.5    |
| C39–C41–H41C      | 109.5    |
| H41A–C41–<br>H41C | 109.5    |
| H41B–C41–<br>H41C | 109.5    |
| F6–C42–F4         | 107.8(5) |
| F6–C42–F5         | 105.1(5) |
| F4–C42–F5         | 101.6(4) |
| F6–C42–C27        | 114.5(4) |
| F4–C42–C27        | 114.5(4) |
| F5–C42–C27        | 112.2(4) |
| C31–C43–C23       | 107.7(3) |
| C31–C43–C29       | 128.3(3) |

|             |          |
|-------------|----------|
| C23–C43–C29 | 124.0(3) |
| O4–C44–N4   | 121.5(4) |
| O4–C44–C39  | 119.6(4) |
| N4–C44–C39  | 119.0(4) |
| C1–N1–C10   | 109.0(3) |
| C1–N1–C17   | 124.9(3) |
| C10–N1–C17  | 125.8(3) |
| C21–N2–H2A  | 120.0    |
| C21–N2–H2B  | 120.0    |
| H2A–N2–H2B  | 120.0    |
| C31–N3–C24  | 108.7(3) |
| C31–N3–C38  | 126.4(3) |
| C24–N3–C38  | 124.9(3) |
| C44–N4–H4A  | 120.0    |
| C44–N4–H4B  | 120.0    |
| H4A–N4–H4B  | 120.0    |
| C8–O3–C9    | 118.3(3) |
| C29–O6–C30  | 118.0(3) |

**Table 5. Torsion angles for shelx**

| Atom–Atom–Atom–Atom | Torsion Angle [°] |
|---------------------|-------------------|
| N1–C1–C2–C3         | 176.4(4)          |
| C6–C1–C2–C3         | –0.3(6)           |
| C1–C2–C3–C4         | –0.1(6)           |
| C2–C3–C4–C5         | 0.6(6)            |
| C2–C3–C4–C22        | –178.8(4)         |
| C3–C4–C5–C6         | –0.7(6)           |
| C22–C4–C5–C6        | 178.6(4)          |
| C4–C5–C6–C1         | 0.3(5)            |
| C4–C5–C6–C7         | –176.6(4)         |
| N1–C1–C6–C5         | –177.1(3)         |
| C2–C1–C6–C5         | 0.2(5)            |
| N1–C1–C6–C7         | 0.6(4)            |
| C2–C1–C6–C7         | 177.9(3)          |
| C5–C6–C7–C10        | 175.7(4)          |
| C1–C6–C7–C10        | –1.5(4)           |
| C5–C6–C7–C8         | –4.0(7)           |
| C1–C6–C7–C8         | 178.8(3)          |
| C10–C7–C8–O2        | –177.3(4)         |
| C6–C7–C8–O2         | 2.3(6)            |
| C10–C7–C8–O3        | 3.0(6)            |
| C6–C7–C8–O3         | –177.4(3)         |
| C6–C7–C10–N1        | 1.9(4)            |
| C8–C7–C10–N1        | –178.5(3)         |
| C6–C7–C10–C11       | –170.3(4)         |
| C8–C7–C10–C11       | 9.4(7)            |
| C7–C10–C11–C12      | –71.6(5)          |

|                 |           |
|-----------------|-----------|
| N1–C10–C11–C12  | 117.0(4)  |
| C7–C10–C11–C16  | 106.0(5)  |
| N1–C10–C11–C16  | –65.4(5)  |
| C16–C11–C12–C13 | 0.3(6)    |
| C10–C11–C12–C13 | 177.9(4)  |
| C11–C12–C13–C14 | –0.2(7)   |
| C12–C13–C14–C15 | –0.2(8)   |
| C13–C14–C15–C16 | 0.3(8)    |
| C14–C15–C16–C11 | –0.2(7)   |
| C12–C11–C16–C15 | –0.2(6)   |
| C10–C11–C16–C15 | –177.8(4) |
| N1–C17–C18–C19  | 51.4(4)   |
| N1–C17–C18–C20  | 171.2(3)  |
| N1–C17–C18–C21  | –73.3(4)  |
| C19–C18–C21–O1  | 165.7(4)  |
| C20–C18–C21–O1  | 45.1(5)   |
| C17–C18–C21–O1  | –70.3(4)  |
| C19–C18–C21–N2  | –15.5(5)  |
| C20–C18–C21–N2  | –136.2(4) |
| C17–C18–C21–N2  | 108.4(4)  |
| C5–C4–C22–F1    | –10.2(7)  |
| C3–C4–C22–F1    | 169.1(4)  |
| C5–C4–C22–F3    | –133.3(5) |
| C3–C4–C22–F3    | 46.1(6)   |
| C5–C4–C22–F2    | 108.2(5)  |
| C3–C4–C22–F2    | –72.4(6)  |
| C28–C23–C24–C25 | 1.2(6)    |

|                 |           |
|-----------------|-----------|
| C43-C23-C24-C25 | -176.5(3) |
| C28-C23-C24-N3  | 178.2(3)  |
| C43-C23-C24-N3  | 0.6(4)    |
| C23-C24-C25-C26 | -1.2(6)   |
| N3-C24-C25-C26  | -177.6(4) |
| C24-C25-C26-C27 | 0.4(6)    |
| C25-C26-C27-C28 | 0.5(7)    |
| C25-C26-C27-C42 | 178.7(4)  |
| C26-C27-C28-C23 | -0.5(6)   |
| C42-C27-C28-C23 | -178.7(4) |
| C24-C23-C28-C27 | -0.3(5)   |
| C43-C23-C28-C27 | 176.6(4)  |
| N3-C31-C32-C33  | -115.5(4) |
| C43-C31-C32-C33 | 69.6(5)   |
| N3-C31-C32-C37  | 65.9(5)   |
| C43-C31-C32-C37 | -109.0(4) |
| C37-C32-C33-C34 | 1.0(6)    |
| C31-C32-C33-C34 | -177.7(4) |
| C32-C33-C34-C35 | -0.7(6)   |
| C33-C34-C35-C36 | 0.3(7)    |
| C34-C35-C36-C37 | -0.2(7)   |
| C35-C36-C37-C32 | 0.5(6)    |
| C33-C32-C37-C36 | -0.9(5)   |
| C31-C32-C37-C36 | 177.7(3)  |
| N3-C38-C39-C40  | -51.7(4)  |
| N3-C38-C39-C44  | 74.9(4)   |
| N3-C38-C39-C41  | -171.5(3) |
| C28-C27-C42-F6  | 113.9(6)  |
| C26-C27-C42-F6  | -64.3(7)  |
| C28-C27-C42-F4  | -11.4(6)  |
| C26-C27-C42-F4  | 170.4(4)  |
| C28-C27-C42-F5  | -126.5(5) |
| C26-C27-C42-F5  | 55.3(6)   |
| N3-C31-C43-C23  | -1.6(4)   |
| C32-C31-C43-C23 | 173.8(3)  |
| N3-C31-C43-C29  | -178.6(3) |
| C32-C31-C43-C29 | -3.2(6)   |
| C24-C23-C43-C31 | 0.6(4)    |
| C28-C23-C43-C31 | -176.6(4) |
| C24-C23-C43-C29 | 177.8(3)  |
| C28-C23-C43-C29 | 0.7(6)    |
| O5-C29-C43-C31  | -179.8(4) |
| O6-C29-C43-C31  | 2.0(6)    |
| O5-C29-C43-C23  | 3.6(6)    |
| O6-C29-C43-C23  | -174.7(3) |
| C40-C39-C44-O4  | -167.5(4) |
| C38-C39-C44-O4  | 67.6(4)   |

|                |           |
|----------------|-----------|
| C41-C39-C44-O4 | -45.2(5)  |
| C40-C39-C44-N4 | 12.2(5)   |
| C38-C39-C44-N4 | -112.7(4) |
| C41-C39-C44-N4 | 134.5(4)  |
| C2-C1-N1-C10   | -176.5(4) |
| C6-C1-N1-C10   | 0.6(4)    |
| C2-C1-N1-C17   | 9.3(6)    |
| C6-C1-N1-C17   | -173.6(3) |
| C7-C10-N1-C1   | -1.6(4)   |
| C11-C10-N1-C1  | 171.6(3)  |
| C7-C10-N1-C17  | 172.6(3)  |
| C11-C10-N1-C17 | -14.3(5)  |
| C18-C17-N1-C1  | 80.7(4)   |
| C18-C17-N1-C10 | -92.6(4)  |
| C43-C31-N3-C24 | 2.0(4)    |
| C32-C31-N3-C24 | -173.9(3) |
| C43-C31-N3-C38 | -175.7(3) |
| C32-C31-N3-C38 | 8.5(5)    |
| C25-C24-N3-C31 | 175.2(4)  |
| C23-C24-N3-C31 | -1.6(4)   |
| C25-C24-N3-C38 | -7.1(6)   |
| C23-C24-N3-C38 | 176.1(3)  |
| C39-C38-N3-C31 | 92.4(4)   |
| C39-C38-N3-C24 | -84.8(4)  |
| O2-C8-O3-C9    | -1.6(6)   |
| C7-C8-O3-C9    | 178.0(4)  |
| O5-C29-O6-C30  | 4.4(6)    |
| C43-C29-O6-C30 | -177.3(3) |

#### (4) Competition experiments

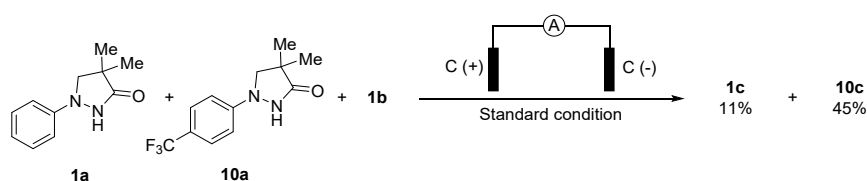

In an oven-dried undivided three-necked flask (25 mL) equipped with a stir bar, **1a** (0.125 mmol), **10a** (0.125 mmol),  $[\text{Cp}^*\text{IrCl}_2]_2$  (1.0 mol%) and KOAc (0.375 mmol) were combined and added. The flask was equipped with a carbon rods ( $\phi = 6$  mm, merge in solution 1.5 cm) as the anode and carbon rods ( $\phi = 6$  mm, merge in solution 1.5 cm) as the cathode and was then charged with nitrogen. Under the protection of nitrogen, **1b** (0.125 mmol) and MeOH (6.0 mL) were slowly injected into the reaction flask. The reaction mixture was stirred and electrolyzed at a constant current of 1 mA ( $0.42 \text{ mA/cm}^2$ ) under RT for 6 h. When the reaction was finished, the solution was concentrated in a vacuum. The desired product **1c** and **10c** was subjected to column chromatography on silica gel (**1c**: 11%, **10c**: 45%).

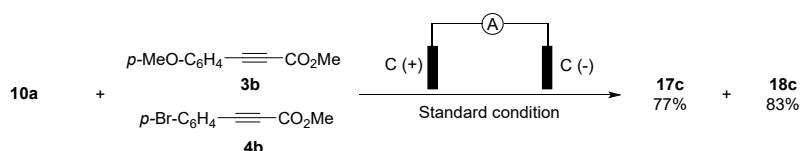

In an oven-dried undivided three-necked flask (25 mL) equipped with a stir bar, **10a** (0.25 mmol),  $[\text{Cp}^*\text{IrCl}_2]_2$  (1.0 mol%) and KOAc (0.375 mmol) were combined and added. The flask was equipped with a carbon rods ( $\phi = 6$  mm, merge in solution 1.5 cm) as the anode and carbon rods ( $\phi = 6$  mm, merge in solution 1.5 cm) as the cathode and was then charged with nitrogen. Under the protection of nitrogen, **3b** (0.125 mmol), **4b** (0.125 mmol) and MeOH (6.0 mL) were slowly injected into the reaction flask. The reaction mixture was stirred and electrolyzed at a constant current of 1 mA ( $0.42 \text{ mA/cm}^2$ ) under RT for 6 h. When the reaction was finished, the solution was concentrated in a vacuum. The desired product **17c** and **18c** was subjected to column chromatography on silica gel (**17c**: 77%, **18c**: 83%).

## (5) Cyclic voltammetry

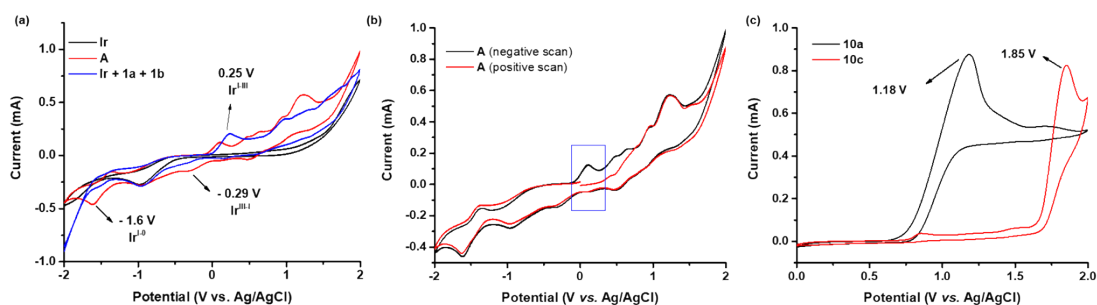

**Figure S4.** Cyclic voltammograms at glassy carbon as work electrode, Ag/AgCl as the reference electrode, Pt (1 x 1 cm<sup>2</sup>) as counter electrode in 0.1 M <sup>n</sup>Bu<sub>4</sub>NBF<sub>4</sub> in CH<sub>3</sub>OH, scan rate 100 mV/s, **A** (0.025 mM), **10a** (0.25 mM), **1b** (0.25 mM), **10c** (0.25 mM), KOAc (0.75 mM), (Cp\*IrCl<sub>2</sub>)<sub>2</sub> (2.0 mg). (a) negative scan. (b) positive scan, no oxidation peak at 0.25 V was observed during the positive scan, while an obvious oxidation peak appeared at 0.25 V (Ir<sup>I</sup> to Ir<sup>III</sup>) during the negative scan, indicating that the Ir<sup>III</sup> produced by reduction elimination is more easily oxidized by the anode. (c) Substrates (**10a**: 1.18 V vs. Ag/AgCl) and products (**10c**: 1.85 V vs. Ag/AgCl) have higher oxidation potentials and will not be preferentially oxidized under given conditions.

## (6) Divided cell electrolysis experiments

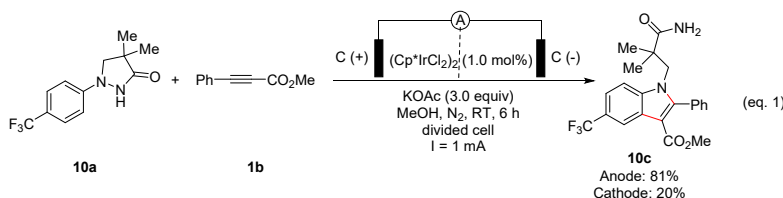

In an oven-dried divided H-cell (10.0 mL, anion exchange membrane) equipped with a stir bar, **10a** (0.25 mmol), [Cp\*IrCl<sub>2</sub>]<sub>2</sub> (1.0 mol%) and KOAc (0.375 mmol) were combined and added in anode and cathode, respectively. The H-cell was equipped with carbon rods ( $\phi = 6$  mm, merge in solution 1.5 cm) as the anode and carbon rods ( $\phi = 6$  mm, merge in solution 1.5 cm) as the cathode and was then charged with nitrogen. Under the protection of nitrogen, **3b** (0.125 mmol), **4b** (0.125 mmol) and MeOH (6.0 mL) were slowly injected into the reaction, respectively. The reaction mixture was stirred and electrolyzed at a constant current of 1 mA (0.42 mA/cm<sup>2</sup>) under RT for 6 h. When the reaction was finished, the solution was concentrated in a vacuum. The desired product **10c** was subjected to column chromatography on silica gel (Anode: 81%, Cathode: 20%).

## 5. Gram-scale synthesis and Synthetic application

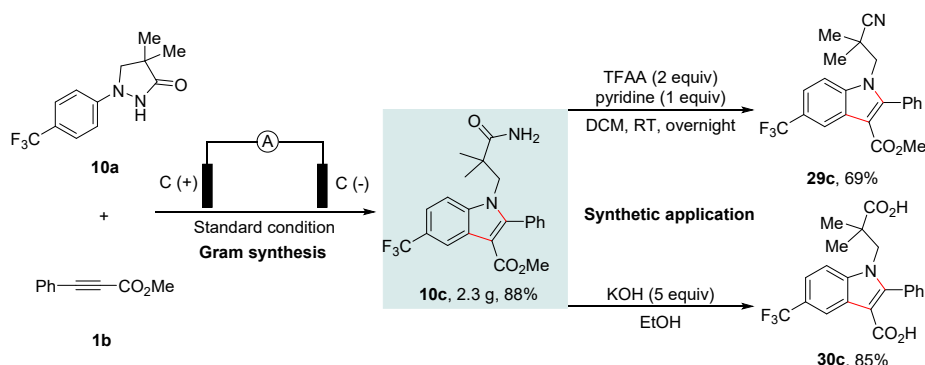

### (1) Gram-scale synthesis

In an oven-dried undivided three-necked flask (500 mL) equipped with a stir bar, **10a** (12.5 mmol),  $[\text{Cp}^*\text{IrCl}_2]_2$  (1.0 mol%) and KOAc (18.75 mmol) were combined and added. The flask was equipped with a carbon rods ( $\phi = 6$  mm, merge in solution 3 cm) as the anode and carbon rods ( $\phi = 6$  mm, merge in solution 3 cm) as the cathode and was then charged with nitrogen. Under the protection of nitrogen, **1b** (6.25 mmol) and MeOH (300.0 mL) were slowly injected into the reaction flask. The reaction mixture was stirred and electrolyzed at a constant current of 1 mA ( $0.85 \text{ mA/cm}^2$ ) under RT for 300 h. When the reaction was finished, the solution was concentrated in a vacuum. The desired product **10c** was subjected to column chromatography on silica gel (yield: 88%).

### (2) Synthetic application

In an oven-dried round-bottom flask (10 mL) equipped with a stir bar, **10c** (0.25 mmol), TFAA (0.5 mmol), pyridine (0.25 mmol), DCM (4.0 mL) were combined and added. The reaction mixture was stirred under room temperature for overnight. Upon completion of the reaction, the reaction mixture was concentrated to remove the solvent, and then the pure product **29c** was obtained by flash column chromatography on silica gel (yield: 69%).

In an oven-dried round-bottom flask (10 mL) equipped with a stir bar, **10c** (0.25 mmol), KOH (1.25 mmol), EtOH (4.0 mL) were combined and added. The reaction mixture was stirred under room temperature for overnight. Upon completion of the reaction, the reaction mixture was concentrated to remove the solvent, and then the pure product **30c** was obtained by flash column chromatography on silica gel (yield: 85%).

## 6. Hammett plot Analysis

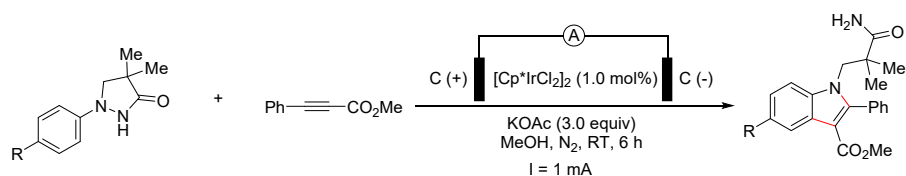

| Entry | R               | Conv. | $\sigma_{\text{para}}$ | Log (conv.R/conv.H) |
|-------|-----------------|-------|------------------------|---------------------|
| 1     | OMe             | 0.54  | -0.268                 | -0.04               |
| 2     | Me              | 0.57  | -0.17                  | -0.022              |
| 3     | H               | 0     | 0                      | 0                   |
| 4     | F               | 0.73  | 0.062                  | 0.085               |
| 5     | Cl              | 0.75  | 0.227                  | 0.096               |
| 6     | CF <sub>3</sub> | 0.86  | 0.53                   | 0.156               |
| 7     | CN              | 0.98  | 1                      | 0.213               |

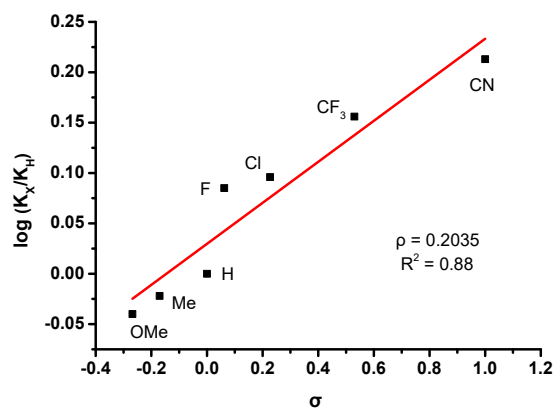

Figure S5. Hammett plot of relative initial rates.

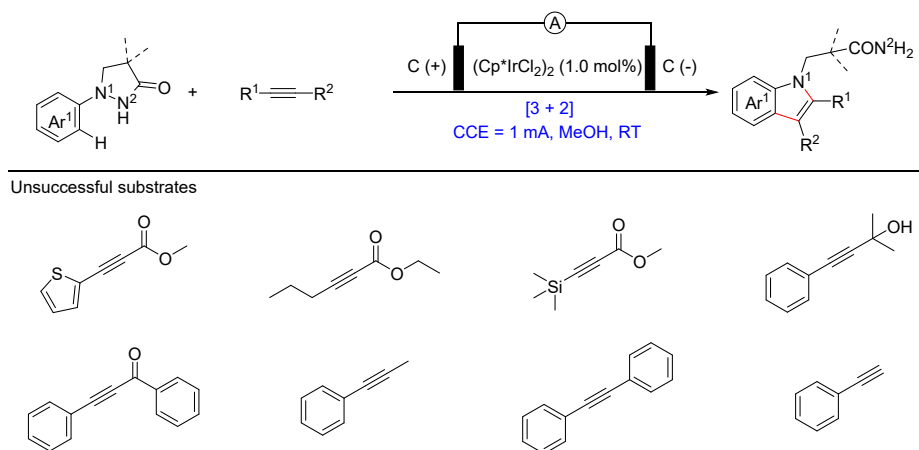

Scheme S1. Limitation of substrate scope.

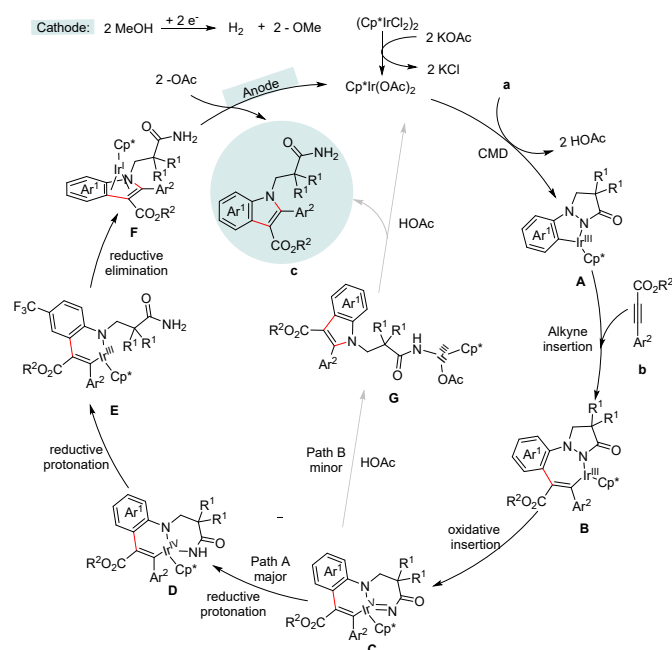

**Scheme S2.** Proposed reaction mechanism.

On the basis of our experimental results and previous reports, a possible catalytic mechanism is proposed for the Ir-catalyzed electrochemical C-H/N-N [3+2] annulation of phenidones with propiolates (Scheme S2). Initially, the active catalyst  $\text{Cp}^* \text{ Ir}(\text{OAc})_2$  is generated via ligand exchange between  $(\text{Cp}^* \text{ IrCl}_2)_2$  and KOAc. Then, the *in situ* generated  $\text{Ir}^{\text{III}}$  catalyst undergoes a CMD process with phenidones, resulting in the formation of complex **A**. The subsequent step involves the regioselective insertion of alkynes, followed through  $\text{Ir}^{\text{III}}$  oxidative insertion into the activated N–N bond to obtain  $\text{Ir}^{\text{V}}$  complex **C**. Then, the  $\text{N}=\text{Ir}^{\text{V}}$  intermediate **C** maybe undergoes a coherent reductive protonation to generate intermediate **E**, which subsequently undergoes reductive elimination to form the  $\text{Ir}^{\text{I}}$  complex **F**. However, the transition from steps **C** to **D** to **E** currently lacks clarity and is subject to further investigation in future studies. Finally, the catalytic cycle can be completed by regenerating  $\text{Ir}^{\text{III}}$  through anodic oxidation of  $\text{Ir}^{\text{I}}$  complex **F** assisted by  $\text{OAc}^-$  and releasing the desired product (Path A, major). Certainly, the possibility of the catalytic pathway via HOAc protonation cannot be entirely disregarded (Path B, minor).

## 7. Detail descriptions for products

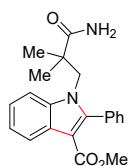

**methyl 1-(3-amino-2,2-dimethyl-3-oxopropyl)-2-phenyl-1H-indole-3-carboxylate (1c):** white solid was obtained by column chromatography (eluent: EtOAc/petroleum ether = 1/3) with 60% isolated yield (26.3 mg).  $^1\text{H}$  NMR (500 MHz,  $\text{CDCl}_3$ )  $\delta$  8.15 (m, 1H), 7.56 (m, 1H), 7.44 (m, 3H), 7.35 (m, 2H), 7.20 (dd,  $J$  = 6.1, 3.2 Hz, 2H), 5.28 (s, 2H), 4.38 (s, 2H), 3.68 (s, 3H), 0.84 (s, 6H).  $^{13}\text{C}$  NMR (126 MHz, DMSO)  $\delta$  178.1, 164.9, 147.3, 137.5, 131.7, 131.7, 129.2, 128.1, 126.3, 122.9, 122.1, 121.4, 112.8, 105.4, 50.9, 50.7, 43.9, 24.6. HRMS (ESI)  $m/z$ :  $[\text{M}+\text{H}]^+$  calcd for  $\text{C}_{21}\text{H}_{23}\text{N}_2\text{O}_3$ : 351.1703; found: 351.1712.



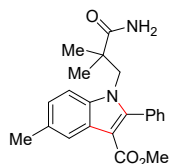

**methyl 1-(3-amino-2,2-dimethyl-3-oxopropyl)-5-methyl-2-phenyl-1H-indole-3-carboxylate (2c):**

white solid was obtained by column chromatography (eluent: EtOAc/petroleum ether = 1/3) with 57% isolated yield (25.9 mg). <sup>1</sup>H NMR (500 MHz, CDCl<sub>3</sub>) δ 7.98 (s, 1H), 7.49 (m, 4H), 7.39 (m, 2H), 7.08 (dd, *J* = 8.5, 1.4 Hz, 1H), 5.44 (d, *J* = 29.2 Hz, 2H), 4.40 (s, 2H), 3.73 (s, 3H), 2.49 (s, 3H), 0.88 (s, 6H). <sup>13</sup>C NMR (126 MHz, CDCl<sub>3</sub>) δ 179.0, 165.6, 147.0, 135.4, 131.7, 131.5, 131.2, 128.9, 128.0, 126.6, 124.5, 121.3, 111.5, 105.7, 50.8, 50.7, 43.9, 24.2, 21.5. HRMS (ESI) *m/z*: [M+H]<sup>+</sup> calcd for C<sub>22</sub>H<sub>25</sub>N<sub>2</sub>O<sub>3</sub>: 365.1860; found: 365.1865. m. p. = 115-117 °C.

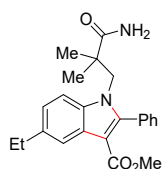

**methyl 1-(3-amino-2,2-dimethyl-3-oxopropyl)-5-ethyl-2-phenyl-1H-indole-3-carboxylate (3c):**

white solid was obtained by column chromatography (eluent: EtOAc/petroleum ether = 1/3) with 56% isolated yield (26.4 mg). <sup>1</sup>H NMR (500 MHz, CDCl<sub>3</sub>) δ 8.01 (s, 1H), 7.54 (m, 4H), 7.40 (m, 2H), 7.10 (dd, *J* = 8.5, 1.7 Hz, 1H), 5.59 (d, *J* = 106.3 Hz, 2H), 4.40 (s, 2H), 3.72 (s, 3H), 2.77 (q, *J* = 7.6 Hz, 2H), 1.30 (t, *J* = 7.6 Hz, 3H), 0.88 (s, 6H). <sup>13</sup>C NMR (126 MHz, CDCl<sub>3</sub>) δ 179.3, 165.6, 147.0, 138.4, 135.6, 131.6, 131.2, 128.9, 128.0, 126.6, 123.5, 120.1, 116.3, 111.6, 105.8, 50.8, 50.7, 43.9, 29.1, 24.2, 16.4. HRMS (ESI) *m/z*: [M+H]<sup>+</sup> calcd for C<sub>23</sub>H<sub>27</sub>N<sub>2</sub>O<sub>3</sub>: 379.2016; found: 379.2018. m. p. = 116-118 °C.

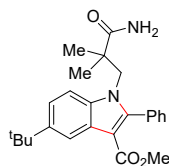

**methyl 1-(3-amino-2,2-dimethyl-3-oxopropyl)-5-(tert-butyl)-2-phenyl-1H-indole-3-carboxylate (4c):**

white solid was obtained by column chromatography (eluent: EtOAc/petroleum ether = 1/3) with 48% isolated yield (24.3 mg). <sup>1</sup>H NMR (500 MHz, CDCl<sub>3</sub>) δ 8.23 (d, *J* = 1.5 Hz, 1H), 7.53 (d, *J* = 8.8 Hz, 1H), 7.48 (d, *J* = 6.1 Hz, 3H), 7.38 (m, 3H), 5.32 (d, *J* = 37.2 Hz, 2H), 4.41 (s, 2H), 3.72 (s, 3H), 1.42 (s, 9H), 0.91 (s, 6H). <sup>13</sup>C NMR (126 MHz, CDCl<sub>3</sub>) δ 178.9, 165.6, 146.9, 145.3, 135.3, 131.7, 131.2, 128.8, 128.0, 126.2, 121.3, 117.4, 111.2, 106.1, 50.9, 50.7, 43.9, 34.8, 31.8, 24.3. HRMS (ESI) *m/z*: [M+H]<sup>+</sup> calcd for C<sub>25</sub>H<sub>31</sub>N<sub>2</sub>O<sub>3</sub>: 407.2329; found: 407.2328. m. p. = 120-122 °C.

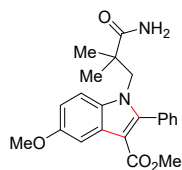

**methyl 1-(3-amino-2,2-dimethyl-3-oxopropyl)-5-methoxy-2-phenyl-1H-indole-3-carboxylate (5c):**

white solid was obtained by column chromatography (eluent: EtOAc/petroleum ether = 1/3) with 54% isolated yield (25.7 mg). <sup>1</sup>H NMR (500 MHz, CDCl<sub>3</sub>) δ 7.68 (d, *J* = 2.5 Hz, 1H), 7.51 (m, 4H), 7.39 (m, 2H), 6.90 (dd, *J* = 9.0, 2.6 Hz, 1H), 5.46 (d, *J* = 36.4 Hz, 2H), 4.39 (s, 2H), 3.89 (s, 3H), 3.70 (s, 3H), 0.88 (s, 6H). <sup>13</sup>C NMR (126 MHz, CDCl<sub>3</sub>) δ 179.0, 165.6, 155.9, 147.1, 132.0, 131.5, 131.1, 128.9, 128.0, 127.3, 113.1, 112.7, 105.7, 103.1, 55.7, 51.0, 50.7, 43.9, 24.2. HRMS (ESI) *m/z*: [M+H]<sup>+</sup> calcd for C<sub>22</sub>H<sub>25</sub>N<sub>2</sub>O<sub>4</sub>: 365.1860; found: 381.1813. m. p. = 110-112 °C.

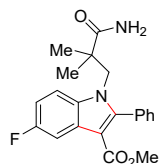

**methyl 1-(3-amino-2,2-dimethyl-3-oxopropyl)-5-fluoro-2-phenyl-1H-indole-3-carboxylate (6c):**

white solid was obtained by column chromatography (eluent: EtOAc/petroleum ether = 1/3) with 73% isolated yield (33.6 mg). <sup>1</sup>H NMR (500 MHz, CDCl<sub>3</sub>) δ 7.84 (dd, *J* = 9.9, 2.6 Hz, 1H), 7.55 (dd, *J* = 9.0, 4.4 Hz, 1H), 7.50 (dd, *J* = 5.5, 1.5 Hz, 3H), 7.42 (m, 2H), 7.00 (td, *J* = 9.0, 2.6 Hz, 1H), 5.32 (d, *J* = 53.5 Hz, 2H), 4.43 (s, 2H), 3.74 (s, 3H), 0.89 (s, 6H). <sup>13</sup>C NMR (126 MHz, DMSO) δ 178.1, 164.5, 158.90 (d, *J* = 234.8 Hz), 148.8, 134.1, 131.6, 131.3, 129.3, 128.2, 127.03 (d, *J* = 11.0 Hz), 114.32 (d, *J* = 9.6 Hz), 111.09 (d, *J* = 25.8 Hz), 106.18 (d, *J* = 24.8 Hz), 105.52 (d, *J* = 4.2 Hz), 51.1, 51.0, 43.9, 24.6. HRMS (ESI) *m/z*: [M+H]<sup>+</sup> calcd for C<sub>21</sub>H<sub>22</sub>N<sub>2</sub>O<sub>3</sub>F: 369.1609; found: 369.1627. m. p. = 135-137 °C.

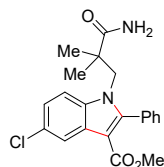

**methyl 1-(3-amino-2,2-dimethyl-3-oxopropyl)-5-chloro-2-phenyl-1H-indole-3-carboxylate (7c):**

white solid was obtained by column chromatography (eluent: EtOAc/petroleum ether = 1/3) with 75% isolated yield (36.1 mg). <sup>1</sup>H NMR (500 MHz, CDCl<sub>3</sub>) δ 8.16 (d, *J* = 2.0 Hz, 1H), 7.55 (d, *J* = 8.8 Hz, 1H), 7.50 (dd, *J* = 5.2, 1.7 Hz, 3H), 7.41 (m, 2H), 7.21 (dd, *J* = 8.8, 2.1 Hz, 1H), 5.32 (d, *J* = 52.1 Hz, 2H), 4.42 (s, 2H), 3.75 (s, 3H), 0.89 (s, 6H). <sup>13</sup>C NMR (126 MHz, CDCl<sub>3</sub>) δ 178.7, 165.0, 148.1, 135.4,

131.1, 130.9, 129.2, 128.1, 128.1, 127.4, 123.3, 121.2, 112.9, 105.9, 51.0, 50.9, 43.8, 24.2. HRMS (ESI)  $m/z$ :  $[M+Na]^+$  calcd for  $C_{21}H_{21}N_2O_3ClNa$ : 407.1133; found: 407.1337. m. p. = 129-131 °C.

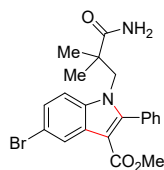

**methyl 1-(3-amino-2,2-dimethyl-3-oxopropyl)-5-bromo-2-phenyl-1H-indole-3-carboxylate (8c):**

white solid was obtained by column chromatography (eluent: EtOAc/petroleum ether = 1/3) with 80% isolated yield (42.9 mg).  $^1H$  NMR (500 MHz,  $CDCl_3$ )  $\delta$  8.32 (d,  $J$  = 1.8 Hz, 1H), 7.53 (m, 4H), 7.41 (m, 2H), 7.33 (dd,  $J$  = 8.8, 1.9 Hz, 1H), 5.44 (d,  $J$  = 16.9 Hz, 2H), 4.41 (s, 2H), 3.74 (s, 3H), 0.88 (s, 6H).  $^{13}C$  NMR (126 MHz,  $CDCl_3$ )  $\delta$  178.7, 164.9, 147.9, 135.7, 131.1, 130.8, 129.2, 128.1, 127.9, 125.9, 124.3, 115.8, 113.4, 105.8, 51.0, 50.9, 43.8, 24.2. HRMS (ESI)  $m/z$ :  $[M+H]^+$  calcd for  $C_{21}H_{22}N_2O_3Br$ : 429.0808; found: 429.0809. m. p. = 127-129 °C.

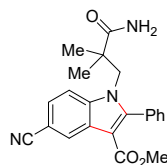

**methyl 1-(3-amino-2,2-dimethyl-3-oxopropyl)-5-cyano-2-phenyl-1H-indole-3-carboxylate (9c):**

white solid was obtained by column chromatography (eluent: EtOAc/petroleum ether = 1/3) with 98% isolated yield (45.9 mg).  $^1H$  NMR (500 MHz,  $CDCl_3$ )  $\delta$  8.55 (s, 1H), 7.73 (d,  $J$  = 8.7 Hz, 1H), 7.54 (m, 3H), 7.47 (d,  $J$  = 8.6 Hz, 1H), 7.44 (m, 2H), 5.47 (s, 2H), 4.48 (s, 2H), 3.77 (s, 3H), 0.90 (s, 6H).  $^{13}C$  NMR (126 MHz,  $CDCl_3$ )  $\delta$  178.5, 164.5, 149.1, 138.6, 131.0, 130.3, 129.6, 128.2, 127.4, 126.1, 125.8, 120.2, 112.8, 106.8, 105.4, 51.1, 51.1, 43.8, 24.2. HRMS (ESI)  $m/z$ :  $[M+H]^+$  calcd for  $C_{22}H_{22}N_3O_3$ : 376.1656; found: 376.1661. m. p. = 114-116 °C.

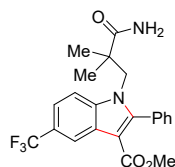

**methyl 1-(3-amino-2,2-dimethyl-3-oxopropyl)-2-phenyl-5-(trifluoromethyl)-1H-indole-3-carboxylate (10c):** white solid was obtained by column chromatography (eluent: EtOAc/petroleum ether = 1/3) with 86% isolated yield (44.9 mg).  $^1H$  NMR (500 MHz,  $CDCl_3$ )  $\delta$  8.49 (s, 1H), 7.73 (d,  $J$  = 8.7 Hz, 1H), 7.51 (dd,  $J$  = 5.5, 4.2 Hz, 4H), 7.42 (m, 2H), 5.49 (d,  $J$  = 36.2 Hz, 2H), 4.48 (s, 2H), 3.76 (s,

3H), 0.90 (s, 6H).  $^{13}\text{C}$  NMR (126 MHz,  $\text{CDCl}_3$ )  $\delta$  179.1, 164.9, 148.6, 138.4, 131.0, 130.6, 129.4, 128.1, 125.8, 125.07 (q,  $J = 271.7$  Hz), 124.47 (q,  $J = 31.9$  Hz), 119.69 (q,  $J = 3.4$  Hz), 119.55 (q,  $J = 4.2$  Hz), 112.2, 106.9, 51.0, 43.8, 24.1. HRMS (ESI)  $m/z$ :  $[\text{M}+\text{H}]^+$  calcd for  $\text{C}_{22}\text{H}_{22}\text{N}_2\text{O}_3\text{F}_3$ : 419.1577; found: 419.1588. m. p. = 119-121  $^\circ\text{C}$ .

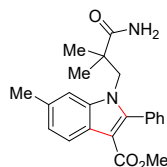

**methyl 1-(3-amino-2,2-dimethyl-3-oxopropyl)-6-methyl-2-phenyl-1H-indole-3-carboxylate (11c):**

white solid was obtained by column chromatography (eluent: EtOAc/petroleum ether = 1/3) with 54% isolated yield (24.6 mg).  $^1\text{H}$  NMR (500 MHz,  $\text{CDCl}_3$ )  $\delta$  8.05 (d,  $J = 8.2$  Hz, 1H), 7.47 (t,  $J = 6.2$  Hz, 3H), 7.39 (s, 3H), 7.10 (d,  $J = 8.2$  Hz, 1H), 5.31 (d,  $J = 16.0$  Hz, 2H), 4.41 (s, 2H), 3.74 (s, 3H), 2.48 (s, 3H), 0.90 (s, 6H).  $^{13}\text{C}$  NMR (126 MHz,  $\text{CDCl}_3$ )  $\delta$  178.9, 165.5, 146.5, 137.5, 132.9, 131.5, 131.2, 128.9, 128.0, 124.1, 123.9, 121.3, 111.6, 106.1, 50.7, 50.6, 44.0, 24.3, 21.9. HRMS (ESI)  $m/z$ :  $[\text{M}+\text{H}]^+$  calcd for  $\text{C}_{22}\text{H}_{25}\text{N}_2\text{O}_3$ : 365.1860; found: 365.1865. m. p. = 117-119  $^\circ\text{C}$ .

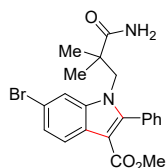

**methyl 1-(3-amino-2,2-dimethyl-3-oxopropyl)-6-bromo-2-phenyl-1H-indole-3-carboxylate (12c):**

white solid was obtained by column chromatography (eluent: EtOAc/petroleum ether = 1/3) with 48% isolated yield (25.8 mg).  $^1\text{H}$  NMR (500 MHz,  $\text{CDCl}_3$ )  $\delta$  8.05 (d,  $J = 8.6$  Hz, 1H), 7.78 (d,  $J = 1.1$  Hz, 1H), 7.51 (m, 3H), 7.40 (m, 2H), 7.35 (dd,  $J = 8.6, 1.4$  Hz, 1H), 5.60 (d,  $J = 144.4$  Hz, 2H), 4.40 (s, 2H), 3.73 (s, 3H), 0.89 (s, 6H).  $^{13}\text{C}$  NMR (126 MHz,  $\text{CDCl}_3$ )  $\delta$  178.8, 165.0, 147.4, 137.8, 131.1, 130.9, 129.2, 128.1, 125.4, 125.2, 123.0, 116.6, 114.7, 106.4, 50.9, 43.9, 24.2. HRMS (ESI)  $m/z$ :  $[\text{M}+\text{H}]^+$  calcd for  $\text{C}_{21}\text{H}_{22}\text{N}_2\text{O}_3\text{Br}$ : 429.0808; found: 429.0809. m. p. = 112-114  $^\circ\text{C}$ .

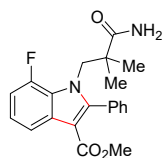

**methyl 1-(3-amino-2,2-dimethyl-3-oxopropyl)-7-fluoro-2-phenyl-1H-indole-3-carboxylate (13c):**

white solid was obtained by column chromatography (eluent: EtOAc/petroleum ether = 1/3) with 22%

isolated yield (10.1 mg).  $^1\text{H}$  NMR (500 MHz,  $\text{CDCl}_3$ )  $\delta$  8.01 (d,  $J = 8.0$  Hz, 1H),  $\delta$  7.46 (t,  $J = 12.5$  Hz, 5H), 7.18 (td,  $J = 8.0, 4.6$  Hz, 1H), 6.99 (dd,  $J = 13.2, 7.9$  Hz, 1H), 5.23 (d,  $J = 33.7$  Hz, 2H), 4.63 (s, 2H), 3.73 (s, 3H), 0.94 (s, 6H).  $^{13}\text{C}$  NMR (126 MHz, DMSO)  $\delta$  177.7, 164.5, 149.81 (d,  $J = 244.4$  Hz), 148.6, 130.7, 130.04 (d,  $J = 4.3$  Hz), 129.4, 128.1, 125.68 (d,  $J = 8.2$  Hz), 122.65 (d,  $J = 7.1$  Hz), 117.83 (d,  $J = 3.0$  Hz), 109.39 (d,  $J = 19.1$  Hz), 106.62 (d,  $J = 1.1$  Hz), 52.33 (d,  $J = 6.3$  Hz), 51.1, 44.2, 23.4. HRMS (ESI)  $m/z$ :  $[\text{M}+\text{H}]^+$  calcd for  $\text{C}_{21}\text{H}_{22}\text{N}_2\text{O}_3\text{F}$ : 369.1609; found: 369.1627. m. p. = 104-106 °C.

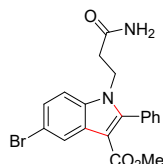

**methyl 1-(3-amino-3-oxopropyl)-5-bromo-2-phenyl-1H-indole-3-carboxylate (14c):** white solid was obtained by column chromatography (eluent: EtOAc/petroleum ether = 1/3) with 51% isolated yield (25.6 mg).  $^1\text{H}$  NMR (500 MHz,  $\text{CDCl}_3$ )  $\delta$  8.35 (d,  $J = 1.6$  Hz, 1H), 7.50 (dd,  $J = 4.9, 1.7$  Hz, 3H), 7.41 (dd,  $J = 8.7, 1.9$  Hz, 1H), 7.38 (m, 3H), 5.30 (d,  $J = 51.2$  Hz, 2H), 4.32 (t,  $J = 7.6$  Hz, 2H), 3.73 (s, 3H), 2.43 (t,  $J = 7.5$  Hz, 2H).  $^{13}\text{C}$  NMR (126 MHz,  $\text{CDCl}_3$ )  $\delta$  171.3, 164.9, 147.2, 134.4, 130.8, 129.8, 129.4, 128.4, 128.2, 126.1, 124.7, 115.8, 111.6, 105.5, 50.9, 39.8, 35.3. HRMS (ESI)  $m/z$ :  $[\text{M}+\text{H}]^+$  calcd for  $\text{C}_{19}\text{H}_{18}\text{N}_2\text{O}_3\text{Br}$ : 401.0495; found: 401.0514. m. p. = 108-110 °C.

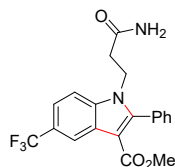

**methyl 1-(3-amino-3-oxopropyl)-2-phenyl-5-(trifluoromethyl)-1H-indole-3-carboxylate (15c):** white solid was obtained by column chromatography (eluent: EtOAc/petroleum ether = 1/3) with 58% isolated yield (28.3 mg).  $^1\text{H}$  NMR (500 MHz,  $\text{CDCl}_3$ )  $\delta$  8.44 (s, 1H), 7.49 (t,  $J = 8.6$  Hz, 2H), 7.42 (dd,  $J = 7.7, 2.7$  Hz, 3H), 7.30 (m, 2H), 5.40 (d,  $J = 90.2$  Hz, 2H), 4.29 (t,  $J = 7.7$  Hz, 2H), 3.67 (s, 3H), 2.36 (t,  $J = 7.5$  Hz, 2H).  $^{13}\text{C}$  NMR (126 MHz,  $\text{CDCl}_3$ )  $\delta$  171.5, 164.8, 147.9, 137.1, 130.6, 129.8, 129.5, 128.5, 126.1, 125.06 (q,  $J = 271.8$  Hz), 124.65 (q,  $J = 32.2$  Hz), 120.01 – 119.84 (m), 110.5, 106.6, 51.0, 39.9, 35.3. HRMS (ESI)  $m/z$ :  $[\text{M}+\text{Na}]^+$  calcd for  $\text{C}_{20}\text{H}_{17}\text{N}_2\text{O}_3\text{F}_3\text{Na}$ : 413.1083; found: 413.1100. m. p. = 111-113 °C.

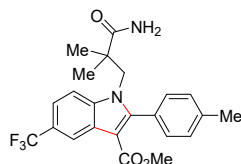

**methyl 1-(3-amino-2,2-dimethyl-3-oxopropyl)-2-(p-tolyl)-5-(trifluoromethyl)-1H-indole-3-carboxylate (16c):** white solid was obtained by column chromatography (eluent: EtOAc/petroleum ether = 1/3) with 71% isolated yield (38.3 mg).  $^1\text{H}$  NMR (500 MHz,  $\text{CDCl}_3$ )  $\delta$  8.39 (s, 1H), 7.62 (d,  $J = 8.7$  Hz, 1H), 7.39 (d,  $J = 8.7$  Hz, 1H), 7.23 (d,  $J = 8.0$  Hz, 2H), 7.19 (d,  $J = 8.3$  Hz, 2H), 5.41 (d,  $J = 50.6$  Hz, 2H), 4.39 (s, 2H), 3.69 (s, 3H), 2.37 (s, 3H), 0.82 (s, 6H).  $^{13}\text{C}$  NMR (126 MHz,  $\text{CDCl}_3$ )  $\delta$  178.8, 164.9, 149.0, 139.4, 138.3, 130.9, 128.9, 127.6, 125.8, 125.10 (q,  $J = 271.6$  Hz), 124.39 (q,  $J = 31.9$  Hz), 119.74 – 119.27 (m), 112.2, 106.8, 51.0, 43.9, 24.2, 21.5. HRMS (ESI)  $m/z$ :  $[\text{M}+\text{H}]^+$  calcd for  $\text{C}_{23}\text{H}_{24}\text{N}_2\text{O}_3\text{F}_3$ : 433.1734; found: 433.1741. m. p. = 119-121  $^\circ\text{C}$ .

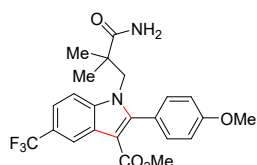

**methyl 1-(3-amino-2,2-dimethyl-3-oxopropyl)-2-(4-methoxyphenyl)-5-(trifluoromethyl)-1H-indole-3-carboxylate (17c):** white solid was obtained by column chromatography (eluent: EtOAc/petroleum ether = 1/3) with 86% isolated yield (48.2 mg).  $^1\text{H}$  NMR (500 MHz,  $\text{CDCl}_3$ )  $\delta$  8.39 (s, 1H), 7.62 (d,  $J = 8.7$  Hz, 1H), 7.39 (d,  $J = 8.7$  Hz, 1H), 7.23 (d,  $J = 8.2$  Hz, 2H), 6.95 (d,  $J = 8.3$  Hz, 2H), 5.40 (d,  $J = 39.7$  Hz, 2H), 4.40 (s, 2H), 3.81 (s, 3H), 3.70 (s, 3H), 0.83 (s, 6H).  $^{13}\text{C}$  NMR (126 MHz,  $\text{CDCl}_3$ )  $\delta$  178.7, 164.9, 160.2, 148.7, 138.3, 132.4, 125.8, 125.10 (q,  $J = 271.6$  Hz), 124.40 (q,  $J = 31.7$  Hz), 122.6, 119.78 – 119.24 (m), 113.6, 112.1, 106.8, 55.2, 51.0, 43.9, 24.2. HRMS (ESI)  $m/z$ :  $[\text{M}+\text{H}]^+$  calcd for  $\text{C}_{23}\text{H}_{24}\text{N}_2\text{O}_4\text{F}_3$ : 449.1683; found: 449.1691. m. p. = 117-119  $^\circ\text{C}$ .

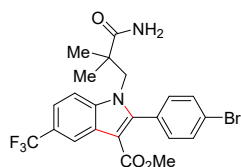

**methyl 1-(3-amino-2,2-dimethyl-3-oxopropyl)-2-(4-bromophenyl)-5-(trifluoromethyl)-1H-indole-3-carboxylate (18c):** white solid was obtained by column chromatography (eluent: EtOAc/petroleum ether = 1/3) with 96% isolated yield (59.6 mg).  $^1\text{H}$  NMR (500 MHz,  $\text{CDCl}_3$ )  $\delta$  8.40 (s, 1H), 7.63 (d,  $J = 8.8$  Hz, 1H), 7.58 (d,  $J = 8.5$  Hz, 2H), 7.42 (dd,  $J = 8.8, 1.4$  Hz, 1H), 7.21 (d,  $J = 8.3$  Hz, 2H), 5.41 (d,  $J$

= 58.3 Hz, 2H), 4.38 (s, 2H), 3.71 (s, 3H), 0.86 (s, 6H). <sup>13</sup>C NMR (126 MHz, CDCl<sub>3</sub>) δ 178.5, 164.7, 147.1, 138.4, 132.7, 131.5, 129.6, 125.7, 124.99 (q, *J* = 270.2 Hz), 124.70 (q, *J* = 28.6 Hz), 124.0, 119.97 (q, *J* = 3.6 Hz), 119.70 (q, *J* = 3.9 Hz), 117.9, 112.2, 107.3, 51.1, 44.0, 24.3, 21.2. HRMS (ESI) *m/z*: [M+H]<sup>+</sup> calcd for C<sub>22</sub>H<sub>21</sub>N<sub>2</sub>O<sub>3</sub>F<sub>3</sub>Br: 497.0682; found: 497.0687. m. p. = 120-122 °C.

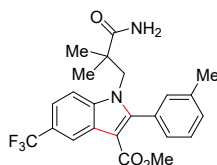

**methyl 1-(3-amino-2,2-dimethyl-3-oxopropyl)-2-(m-tolyl)-5-(trifluoromethyl)-1H-indole-3-carboxylate (19c):** white solid was obtained by column chromatography (eluent: EtOAc/petroleum ether = 1/3) with 56% isolated yield (30.3 mg). <sup>1</sup>H NMR (500 MHz, CDCl<sub>3</sub>) δ 8.48 (s, 1H), 7.70 (d, *J* = 8.7 Hz, 1H), 7.48 (d, *J* = 8.7 Hz, 1H), 7.39 (t, *J* = 7.6 Hz, 1H), 7.31 (d, *J* = 7.7 Hz, 1H), 7.20 (t, *J* = 7.7 Hz, 2H), 5.46 (d, *J* = 23.5 Hz, 2H), 4.47 (d, *J* = 15.1 Hz, 2H), 3.77 (s, 3H), 2.44 (s, 3H), 0.91 (s, 6H). <sup>13</sup>C NMR (126 MHz, CDCl<sub>3</sub>) δ 178.9, 164.8, 148.9, 138.3, 137.8, 131.3, 130.6, 130.1, 128.3, 128.0, 125.8, 125.08 (q, *J* = 272.2 Hz), 124.45 (q, *J* = 32.3 Hz), 119.67 – 119.47 (m), 112.1, 106.9, 51.1, 51.0, 43.8, 21.5. HRMS (ESI) *m/z*: [M+H]<sup>+</sup> calcd for C<sub>23</sub>H<sub>24</sub>N<sub>2</sub>O<sub>3</sub>F<sub>3</sub>: 433.1734; found: 433.1741. m. p. = 125-127 °C.

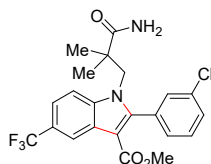

**methyl 1-(3-amino-2,2-dimethyl-3-oxopropyl)-2-(3-chlorophenyl)-5-(trifluoromethyl)-1H-indole-3-carboxylate (20c):** white solid was obtained by column chromatography (eluent: EtOAc/petroleum ether = 1/3) with 68% isolated yield (38.4 mg). <sup>1</sup>H NMR (500 MHz, CDCl<sub>3</sub>) δ 8.42 (s, 1H), 7.64 (d, *J* = 8.7 Hz, 1H), 7.44 (m, 2H), 7.39 (d, *J* = 7.5 Hz, 1H), 7.34 (s, 1H), 7.23 (d, *J* = 7.3 Hz, 1H), 5.42 (d, *J* = 44.6 Hz, 2H), 4.38 (s, 2H), 3.70 (s, 3H), 0.87 (s, 6H). <sup>13</sup>C NMR (126 MHz, CDCl<sub>3</sub>) δ 178.5, 164.6, 146.6, 138.4, 134.1, 132.5, 131.1, 129.5, 129.4, 125.6, 124.99 (q, *J* = 272.0 Hz), 124.70 (q, *J* = 32.0 Hz), 120.02 (q, *J* = 3.4 Hz), 119.72 (q, *J* = 4.3 Hz), 112.3, 107.4, 51.2, 51.1, 43.9, 24.2. HRMS (ESI) *m/z*: [M+Na]<sup>+</sup> calcd for C<sub>22</sub>H<sub>20</sub>N<sub>2</sub>O<sub>3</sub>F<sub>3</sub>ClNa: 475.1007; found: 475.1013. m. p. = 122-124 °C.

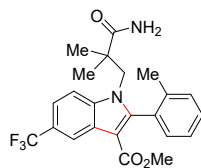

**methyl 1-(3-amino-2,2-dimethyl-3-oxopropyl)-2-(o-tolyl)-5-(trifluoromethyl)-1H-indole-3-carboxylate (21c):** white solid was obtained by column chromatography (eluent: EtOAc/petroleum ether = 1/3) with 22% isolated yield (11.9 mg). <sup>1</sup>H NMR (500 MHz, CDCl<sub>3</sub>) δ 8.50 (s, 1H), 7.73 (d, *J* = 8.7 Hz, 1H), 7.50 (dd, *J* = 8.7, 1.5 Hz, 1H), 7.43 (m, 1H), 7.34 (dd, *J* = 7.7, 3.6 Hz, 2H), 7.31 (d, *J* = 1.8 Hz, 1H), 5.49 (s, 2H), 4.30 (dd, *J* = 324.3, 14.9 Hz, 2H), 3.76 (s, 3H), 2.04 (s, 3H), 0.97 (d, *J* = 15.7 Hz, 6H). <sup>13</sup>C NMR (126 MHz, CDCl<sub>3</sub>) δ 171.5, 164.8, 147.9, 137.1, 130.6, 129.8, 129.5, 128.5, 126.1, 125.06 (q, *J* = 271.8 Hz), 124.65 (q, *J* = 32.2 Hz), 120.00 – 119.79 (m), 110.5, 106.6, 51.0, 39.9, 22.6, 14.1. HRMS (ESI) *m/z*: [M+H]<sup>+</sup> calcd for C<sub>23</sub>H<sub>24</sub>N<sub>2</sub>O<sub>3</sub>F<sub>3</sub>: 433.1734; found: 433.1741. m. p. = 114-116 °C.

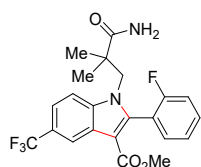

**methyl 1-(3-amino-2,2-dimethyl-3-oxopropyl)-2-(2-fluorophenyl)-5-(trifluoromethyl)-1H-indole-3-carboxylate (22c):** white solid was obtained by column chromatography (eluent: EtOAc/petroleum ether = 1/3) with 31% isolated yield (16.9 mg). <sup>1</sup>H NMR (500 MHz, CDCl<sub>3</sub>) δ 8.43 (s, 1H), 7.65 (d, *J* = 8.8 Hz, 1H), 7.48 (m, 2H), 7.28 (m, 2H), 7.16 (t, *J* = 9.0 Hz, 1H), 5.33 (d, *J* = 21.0 Hz, 2H), 4.35 (s, 2H), 3.72 (s, 3H), 0.88 (d, *J* = 8.9 Hz, 6H). <sup>13</sup>C NMR (126 MHz, CDCl<sub>3</sub>) δ 178.5, 164.5, 160.43 (d, *J* = 248.9 Hz), 142.0, 138.7, 131.89 (d, *J* = 8.3 Hz), 125.7, 125.02 (q, *J* = 271.8 Hz), 124.56 (q, *J* = 31.8 Hz), 124.06 (d, *J* = 3.5 Hz), 119.91 (q, *J* = 5.2 Hz), 119.66 (q, *J* = 4.2 Hz), 119.11 (d, *J* = 15.2 Hz), 115.96 (d, *J* = 21.7 Hz), 112.2, 108.1, 51.6, 51.1, 43.9, 24.2. HRMS (ESI) *m/z*: [M+H]<sup>+</sup> calcd for C<sub>22</sub>H<sub>21</sub>N<sub>2</sub>O<sub>3</sub>F<sub>4</sub>: 437.1483; found: 437.1490. m. p. = 118-120 °C.

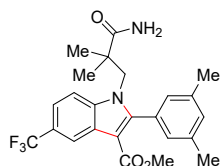

**methyl 1-(3-amino-2,2-dimethyl-3-oxopropyl)-2-(3,5-dimethylphenyl)-5-(trifluoromethyl)-1H-indole-3-carboxylate (23c):** white solid was obtained by column chromatography (eluent: EtOAc/petroleum ether = 1/3) with 46% isolated yield (25.7 mg). <sup>1</sup>H NMR (500 MHz, CDCl<sub>3</sub>) δ 8.40 (s,



1H), 7.62 (d,  $J = 8.7$  Hz, 1H), 7.39 (d,  $J = 8.7$  Hz, 1H), 7.05 (s, 1H), 6.92 (s, 2H), 5.35 (s, 2H), 4.38 (s, 2H), 3.70 (s, 3H), 2.32 (s, 6H), 0.84 (s, 6H).  $^{13}\text{C}$  NMR (126 MHz,  $\text{CDCl}_3$ )  $\delta$  179.0, 164.9, 149.2, 138.3, 137.6, 131.0, 130.4, 128.6, 125.8, 125.11 (q,  $J = 271.8$  Hz), 124.36 (q,  $J = 31.9$  Hz), 119.54 (q,  $J = 3.2$  Hz), 119.47 (q,  $J = 4.3$  Hz), 112.1, 106.8, 51.0, 51.0, 43.8, 24.2, 21.3. HRMS (ESI)  $m/z$ :  $[\text{M}+\text{H}]^+$  calcd for  $\text{C}_{24}\text{H}_{26}\text{N}_2\text{O}_3\text{F}_3$ : 447.1980; found: 447.1893. m. p. = 177-179 °C.

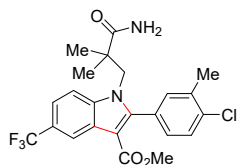

**methyl 1-(3-amino-2,2-dimethyl-3-oxopropyl)-2-(3-chloro-4-methylphenyl)-5-(trifluoromethyl)-1H-indole-3-carboxylate (24c)**: white solid was obtained by column chromatography (eluent: EtOAc/petroleum ether = 1/3) with 57% isolated yield (33.3 mg).  $^1\text{H}$  NMR (500 MHz,  $\text{CDCl}_3$ )  $\delta$  8.39 (s, 1H), 7.62 (d,  $J = 8.7$  Hz, 1H), 7.42 (m, 2H), 7.17 (s, 1H), 7.12 (d,  $J = 8.1$  Hz, 1H), 5.45 (d,  $J = 93.5$  Hz, 2H), 4.37 (d,  $J = 15.4$  Hz, 2H), 3.70 (s, 3H), 2.38 (s, 3H), 0.85 (s, 6H).  $^{13}\text{C}$  NMR (126 MHz,  $\text{CDCl}_3$ )  $\delta$  178.7, 164.8, 147.5, 138.4, 136.1, 135.7, 133.1, 130.0, 129.1, 128.9, 125.02 (q,  $J = 272.3$  Hz), 124.57 (q,  $J = 32.1$  Hz), 119.82 (q,  $J = 3.4$  Hz), 119.63 (q,  $J = 4.2$  Hz), 112.2, 107.2, 51.1, 51.1, 43.9, 20.2. HRMS (ESI)  $m/z$ :  $[\text{M}+\text{H}]^+$  calcd for  $\text{C}_{23}\text{H}_{23}\text{N}_2\text{O}_3\text{F}_3\text{Cl}$ : 467.1344; found: 467.1348. m. p. = 172-174 °C.

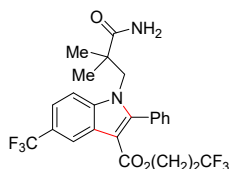

**3,3,3-trifluoropropyl 1-(3-amino-2,2-dimethyl-3-oxopropyl)-2-phenyl-5-(trifluoromethyl)-1H-indole-3-carboxylate (25c)**: white solid was obtained by column chromatography (eluent: EtOAc/petroleum ether = 1/3) with 34% isolated yield (21.2 mg).  $^1\text{H}$  NMR (500 MHz,  $\text{CDCl}_3$ )  $\delta$  8.45 (s, 1H), 7.65 (d,  $J = 8.7$  Hz, 1H), 7.47 (m, 4H), 7.32 (dd,  $J = 6.5, 2.9$  Hz, 2H), 5.37 (s, 2H), 4.40 (s, 2H), 4.30 (t,  $J = 6.3$  Hz, 2H), 2.34 (m, 2H), 0.84 (s, 6H).  $^{13}\text{C}$  NMR (126 MHz,  $\text{CDCl}_3$ )  $\delta$  178.7, 163.8, 148.9, 138.4, 131.0, 130.7, 129.5, 128.1, 125.9, 125.41 (q,  $J = 271.8$  Hz), 125.37 (q,  $J = 277.2$  Hz), 124.74 (q,  $J = 31.9$  Hz), 119.88 (q,  $J = 3.4$  Hz), 119.44 (q,  $J = 4.4$  Hz), 115.5, 112.3, 106.3, 56.57 (q,  $J = 3.8$  Hz), 51.2, 43.8, 33.37 (q,  $J = 29.2$  Hz), 24.2. HRMS (ESI)  $m/z$ :  $[\text{M}+\text{H}]^+$  calcd for  $\text{C}_{24}\text{H}_{23}\text{N}_2\text{O}_3\text{F}_6$ : 501.1607; found: 501.1606. m. p. = 125-127 °C.

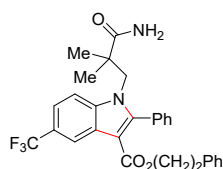

**phenethyl 1-(2,2-dimethyl-3-oxobutyl)-2-phenyl-5-(trifluoromethyl)-1H-indole-3-carboxylate**

**(26c):** white solid was obtained by column chromatography (eluent: EtOAc/petroleum ether = 1/3) with 58% isolated yield (36.8 mg). <sup>1</sup>H NMR (500 MHz, CDCl<sub>3</sub>) δ 8.38 (s, 1H), 7.61 (d, *J* = 8.8 Hz, 1H), 7.40 (dd, *J* = 8.8, 5.5 Hz, 4H), 7.30 (m, 2H), 7.19 (m, 2H), 7.12 (d, *J* = 7.1 Hz, 1H), 7.07 (d, *J* = 7.7 Hz, 2H), 5.38 (d, *J* = 42.2 Hz, 2H), 4.37 (s, 2H), 4.33 (t, *J* = 6.9 Hz, 2H), 2.81 (t, *J* = 6.8 Hz, 2H), 0.81 (s, 6H). <sup>13</sup>C NMR (126 MHz, CDCl<sub>3</sub>) δ 178.8, 164.3, 148.5, 138.4, 138.0, 131.1, 130.8, 129.3, 128.7, 128.4, 128.1, 126.4, 125.9, 125.07 (q, *J* = 271.7 Hz), 124.48 (q, *J* = 31.9 Hz), 119.76 – 119.58 (m), 112.1, 107.0, 64.5, 51.1, 43.8, 35.0, 24.2. HRMS (ESI) *m/z*: [M+H]<sup>+</sup> calcd for C<sub>29</sub>H<sub>28</sub>N<sub>2</sub>O<sub>3</sub>F: 509.2047; found: 509.2048. m. p. = 119-121 °C.

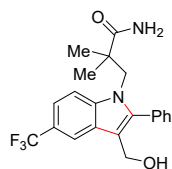

**3-(3-(hydroxymethyl)-2-phenyl-5-(trifluoromethyl)-1H-indol-1-yl)-2,2-dimethylpropanamide**

**(27c):** white solid was obtained by column chromatography (eluent: EtOAc/petroleum ether = 1/3) with 81% isolated yield (39.5 mg). <sup>1</sup>H NMR (500 MHz, CDCl<sub>3</sub>) δ 7.86 (s, 1H), 7.55 (d, *J* = 8.7 Hz, 1H), 7.36 (t, *J* = 1.7 Hz, 1H), 7.32 (dd, *J* = 13.7, 6.1 Hz, 4H), 7.23 (d, *J* = 7.0 Hz, 2H), 5.29 (s, 2H), 4.43 (s, 2H), 4.38 (s, 2H), 0.74 (s, 6H). <sup>13</sup>C NMR (126 MHz, CDCl<sub>3</sub>) δ 179.1, 142.3, 138.7, 130.9, 130.7, 127.1, 125.30 (q, *J* = 267.6 Hz), 122.47 (q, *J* = 31.8 Hz), 118.84 (q, *J* = 9.2 Hz), 116.54 (q, *J* = 8.6 Hz), 112.1, 111.7, 63.1, 51.1, 44.3, 23.9. HRMS (ESI) *m/z*: [M+H]<sup>+</sup> calcd for C<sub>21</sub>H<sub>22</sub>N<sub>2</sub>O<sub>2</sub>F<sub>3</sub>: 391.1628; found: 391.1633. m. p. = 145-147 °C.

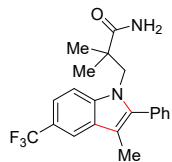

**2,2-dimethyl-3-(3-methyl-2-phenyl-5-(trifluoromethyl)-1H-indol-1-yl)propanamide (28c):**

white solid was obtained by column chromatography (eluent: EtOAc/petroleum ether = 1/3) with 34% isolated yield (15.9 mg). <sup>1</sup>H NMR (500 MHz, CDCl<sub>3</sub>) δ 7.76 (s, 1H), 7.44 (dd, *J* = 14.5, 7.4 Hz, 3H), 7.37 (d, *J* = 7.3 Hz, 1H), 7.34 (s, 1H), 7.29 (s, 1H), 7.27 (s, 1H), 5.62 (s, 1H), 5.30 (s, 1H), 4.42 (s, 2H), 2.17 (s, 3H),

0.80 (s, 6H).  $^{13}\text{C}$  NMR (126 MHz,  $\text{CDCl}_3$ )  $\delta$  179.1, 139.4, 138.6, 131.8, 131.0, 128.6, 128.2, 127.7, 125.48 (q,  $J = 271.4$  Hz), 121.63 (q,  $J = 31.7$  Hz), 118.44 (q,  $J = 3.4$  Hz), 116.29 (q,  $J = 4.2$  Hz), 111.4, 110.8, 51.1, 44.4, 24.0, 9.2. HRMS (ESI)  $m/z$ :  $[\text{M}+\text{H}]^+$  calcd for  $\text{C}_{21}\text{H}_{22}\text{N}_2\text{OF}_3$ : 375.1679; found: 375.1689. m. p. = 130-132 °C.

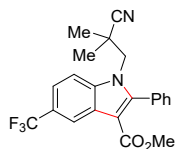

**methyl 1-(2-cyano-2-methylpropyl)-2-phenyl-5-(trifluoromethyl)-1H-indole-3-carboxylate (29c):**

white solid was obtained by column chromatography (eluent: EtOAc/petroleum ether = 1/3) with 69% isolated yield (34.5 mg).  $^1\text{H}$  NMR (500 MHz,  $\text{CDCl}_3$ )  $\delta$  8.47 (s, 1H), 7.67 (d,  $J = 8.7$  Hz, 1H), 7.51 (d,  $J = 8.7$  Hz, 1H), 7.48 (m, 3H), 7.36 (m, 2H), 4.32 (s, 2H), 3.70 (s, 3H), 1.06 (s, 6H).  $^{13}\text{C}$  NMR (126 MHz,  $\text{CDCl}_3$ )  $\delta$  164.6, 148.0, 138.0, 131.1, 130.1, 129.6, 128.3, 126.1, 125.01 (q,  $J = 32.0$  Hz), 124.94 (q,  $J = 272.0$  Hz), 123.5, 120.17 – 119.85 (m), 111.8, 107.8, 51.1, 50.7, 34.1, 25.7. HRMS (ESI)  $m/z$ :  $[\text{M}+\text{H}]^+$  calcd for  $\text{C}_{22}\text{H}_{20}\text{N}_2\text{O}_2\text{F}_3$ : 401.1471; found: 401.1475. m. p. = 125-127 °C.

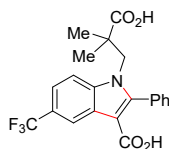

**1-(2-carboxy-2-methylpropyl)-2-phenyl-5-(trifluoromethyl)-1H-indole-3-carboxylic acid (30c):**

yellow oil was obtained by column chromatography (eluent: EtOAc/petroleum ether = 1/1) with 85% isolated yield (43.0 mg).  $^1\text{H}$  NMR (500 MHz,  $\text{CDCl}_3$ )  $\delta$  8.51 (s, 1H), 7.62 (d,  $J = 8.7$  Hz, 1H), 7.40 (dd,  $J = 9.4, 6.9$  Hz, 4H), 7.33 (s, 2H), 6.39 (s, 1H), 5.38 (s, 1H), 4.40 (d,  $J = 11.2$  Hz, 2H), 0.81 (s, 6H).  $^{13}\text{C}$  NMR (126 MHz,  $\text{CDCl}_3$ )  $\delta$  179.9, 168.9, 149.2, 138.5, 131.1, 130.4, 129.4, 128.2, 126.3, 125.02 (q,  $J = 265.3$  Hz), 124.69 (q,  $J = 31.6$  Hz), 120.08 – 119.65 (m), 112.1, 106.4, 51.0, 43.8, 24.1. HRMS (ESI)  $m/z$ :  $[\text{M}+\text{H}]^+$  calcd for  $\text{C}_{21}\text{H}_{19}\text{NO}_4\text{F}_3$ : 406.1261; found: 406.1264.

## 8. Copies of product NMR Spectra

1c

<sup>1</sup>H NMR

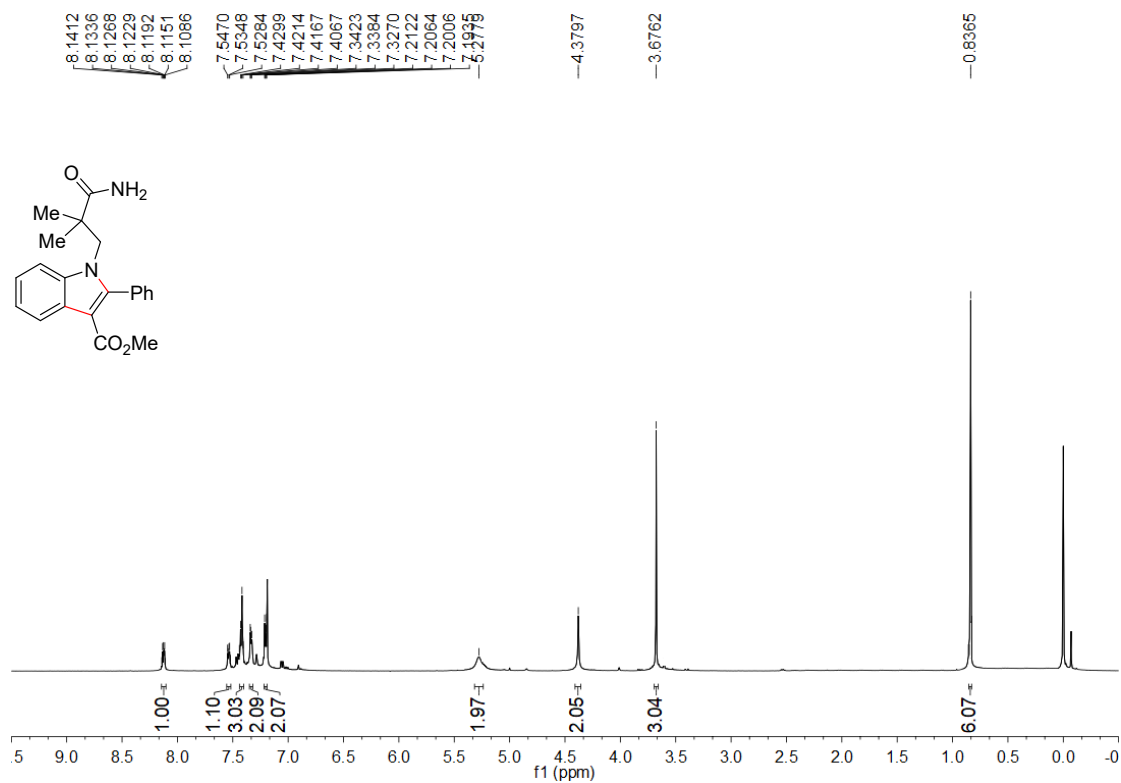

<sup>13</sup>C NMR

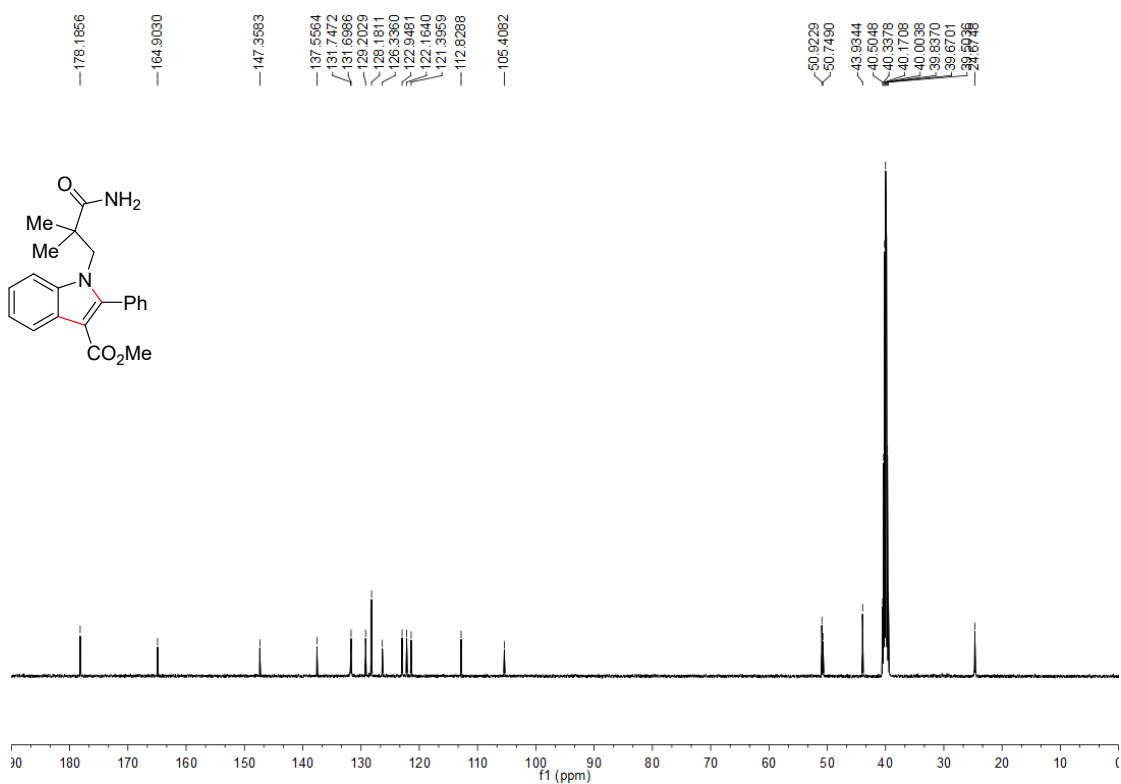

2c

<sup>1</sup>H NMR

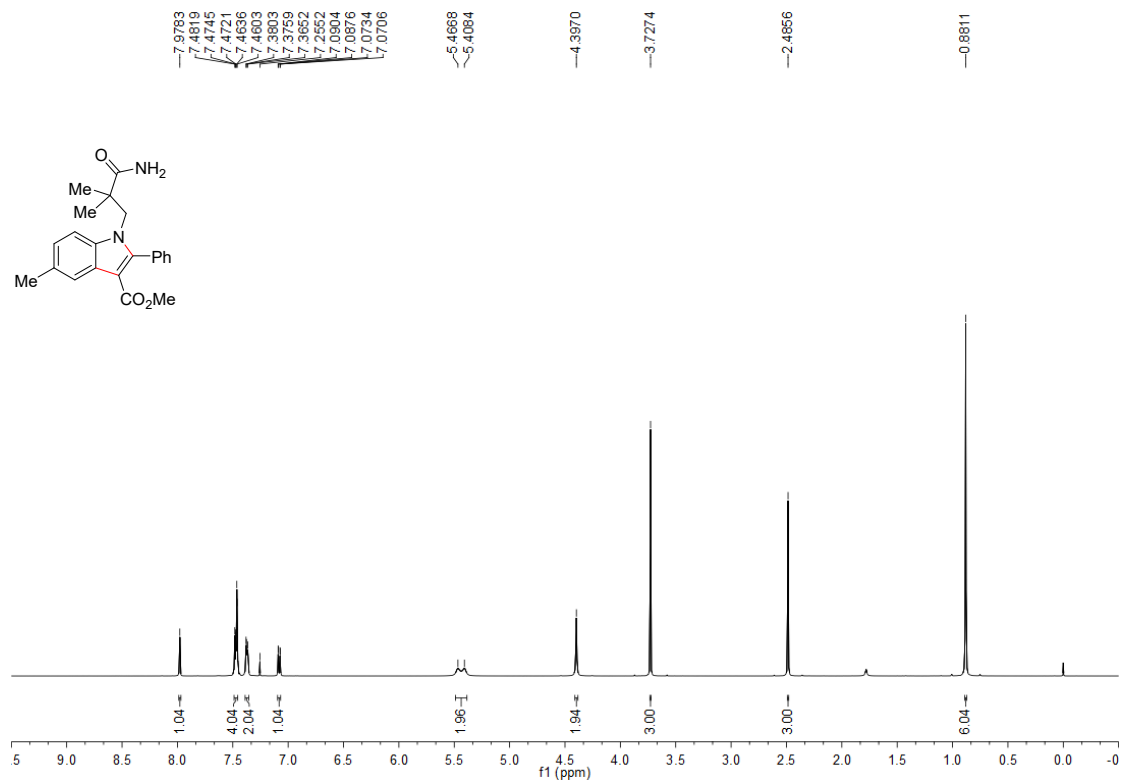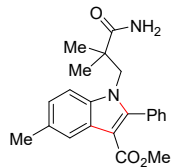

<sup>13</sup>C NMR

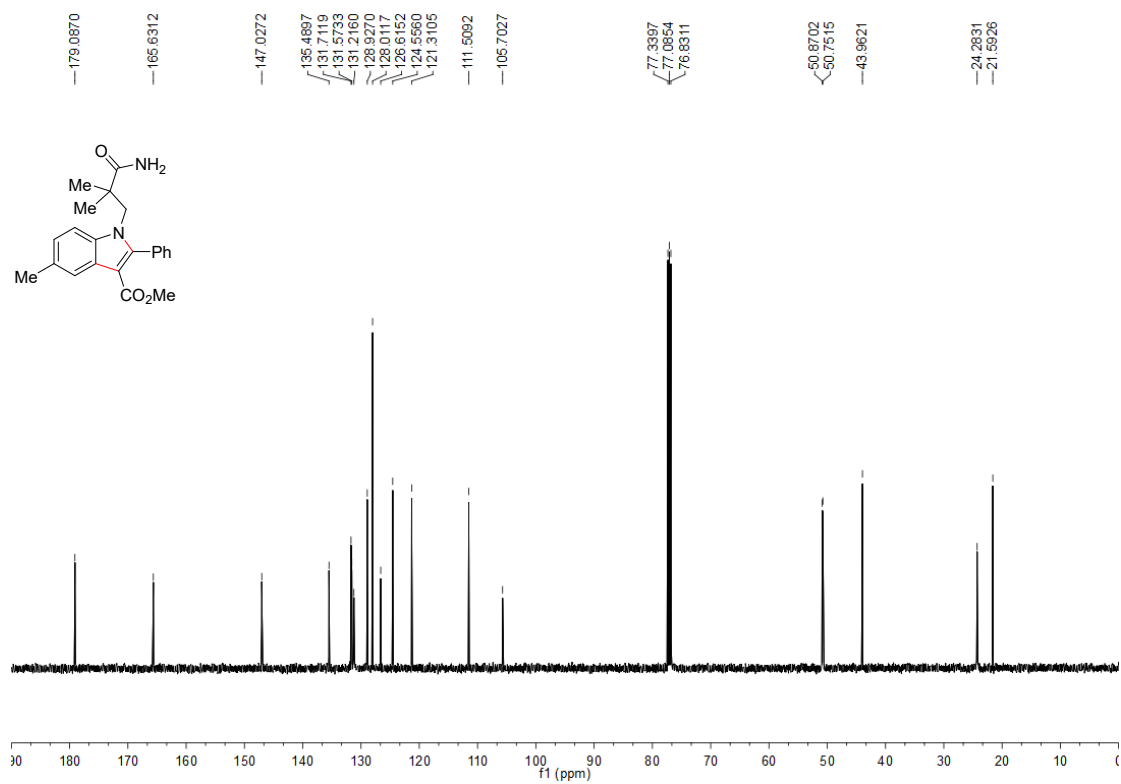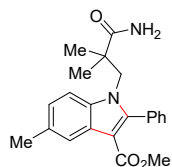

3c

<sup>1</sup>H NMR

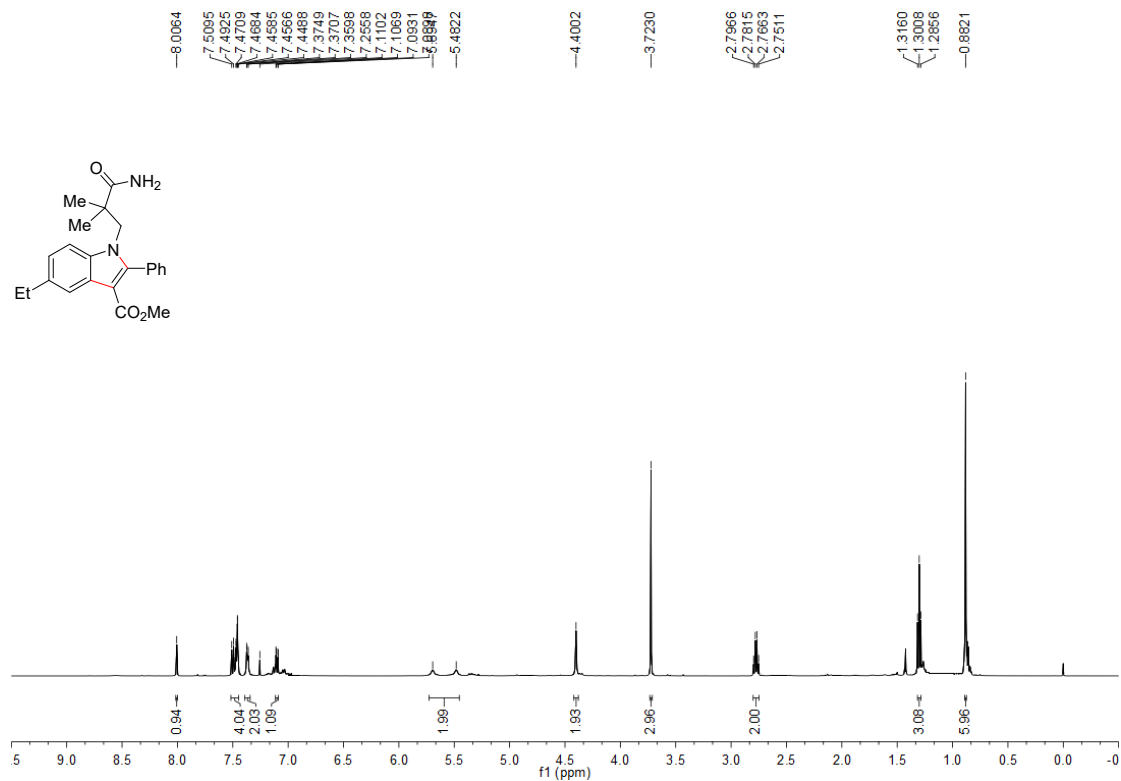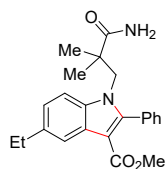

<sup>13</sup>C NMR

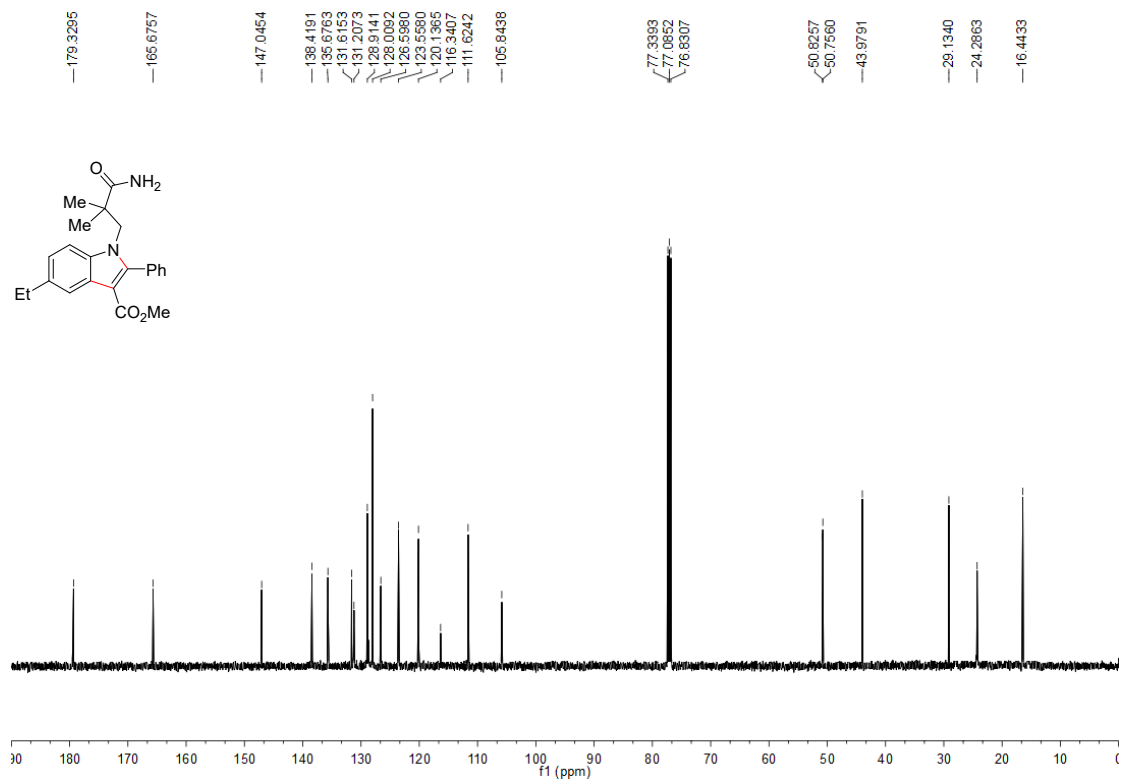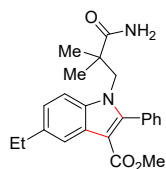

4c

<sup>1</sup>H NMR

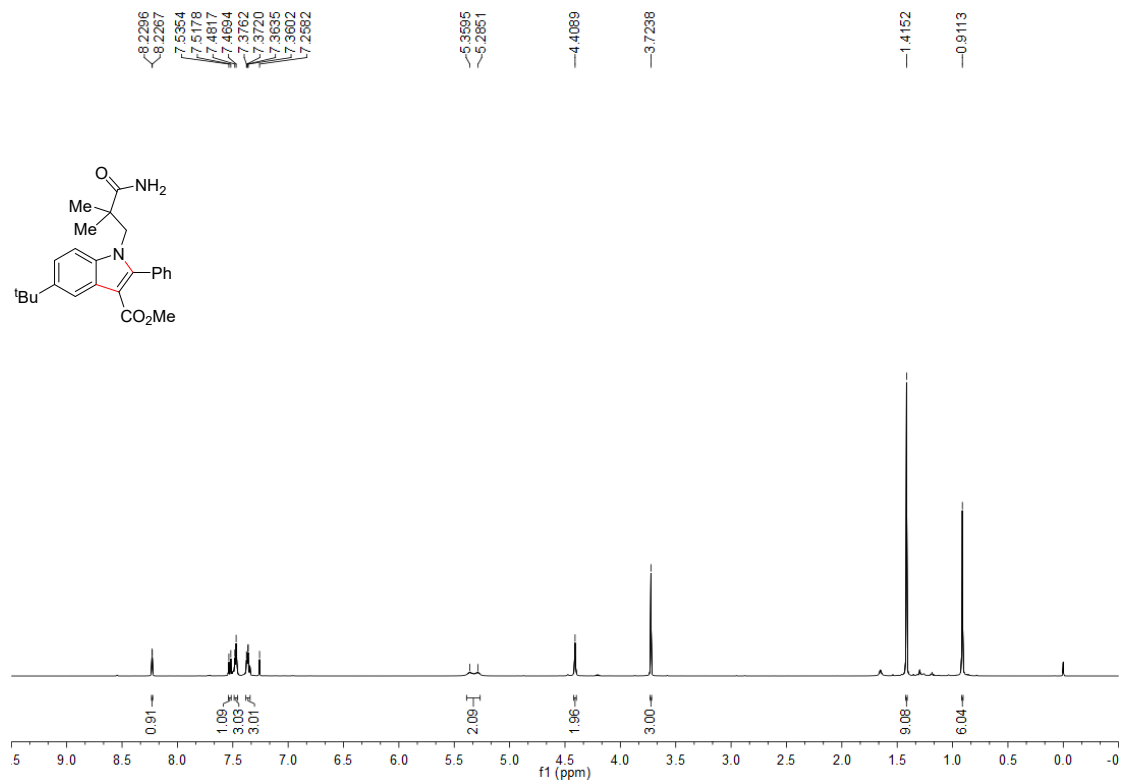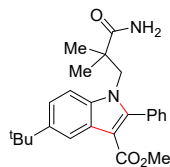

<sup>13</sup>C NMR

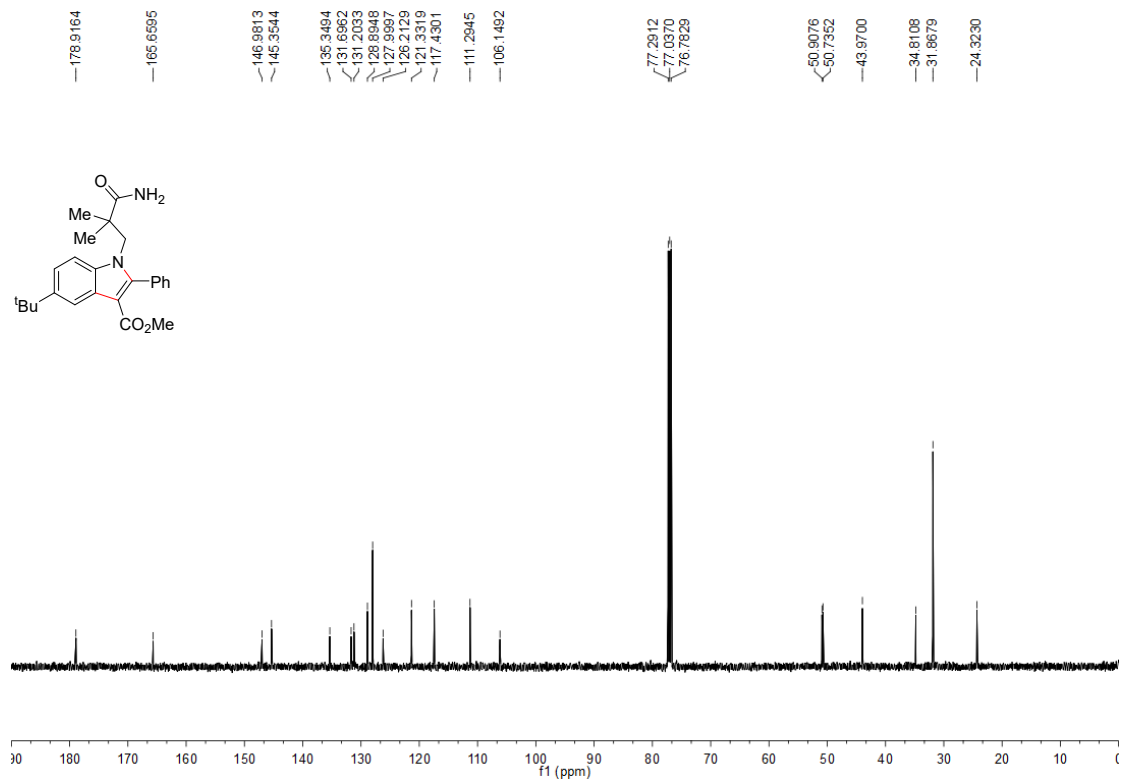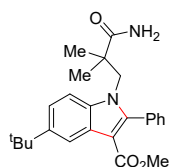

## 5c

 $^1\text{H NMR}$ 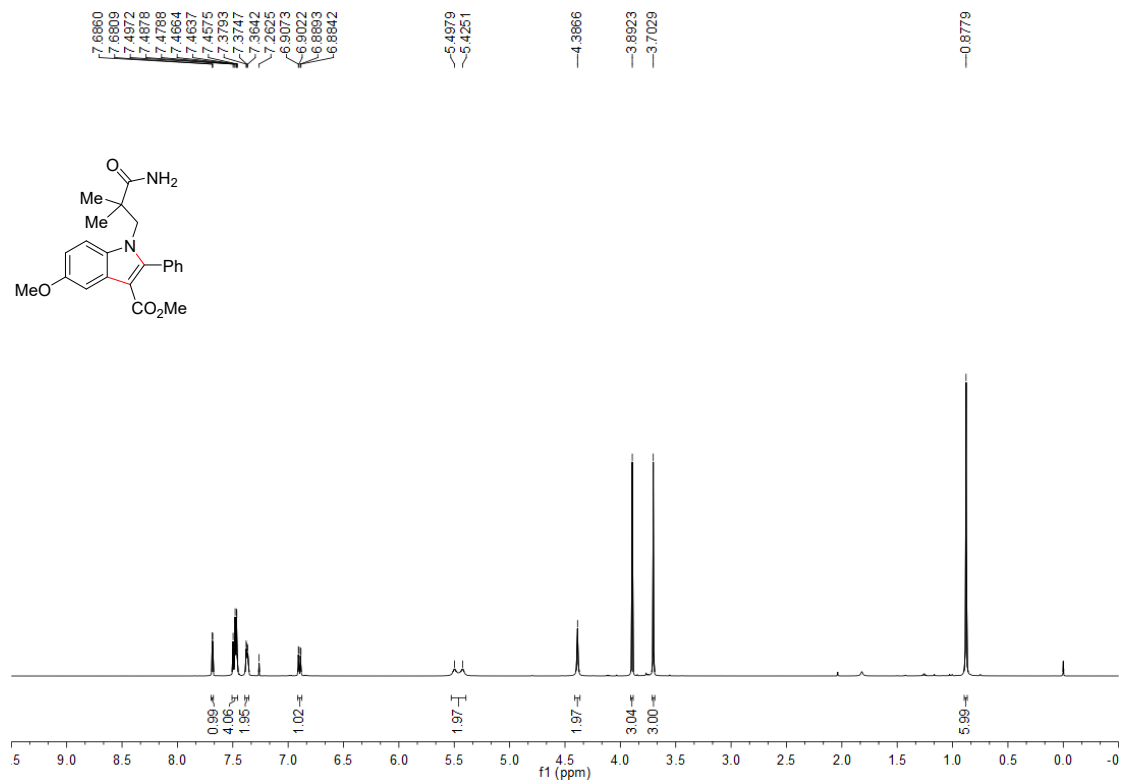 $^{13}\text{C NMR}$ 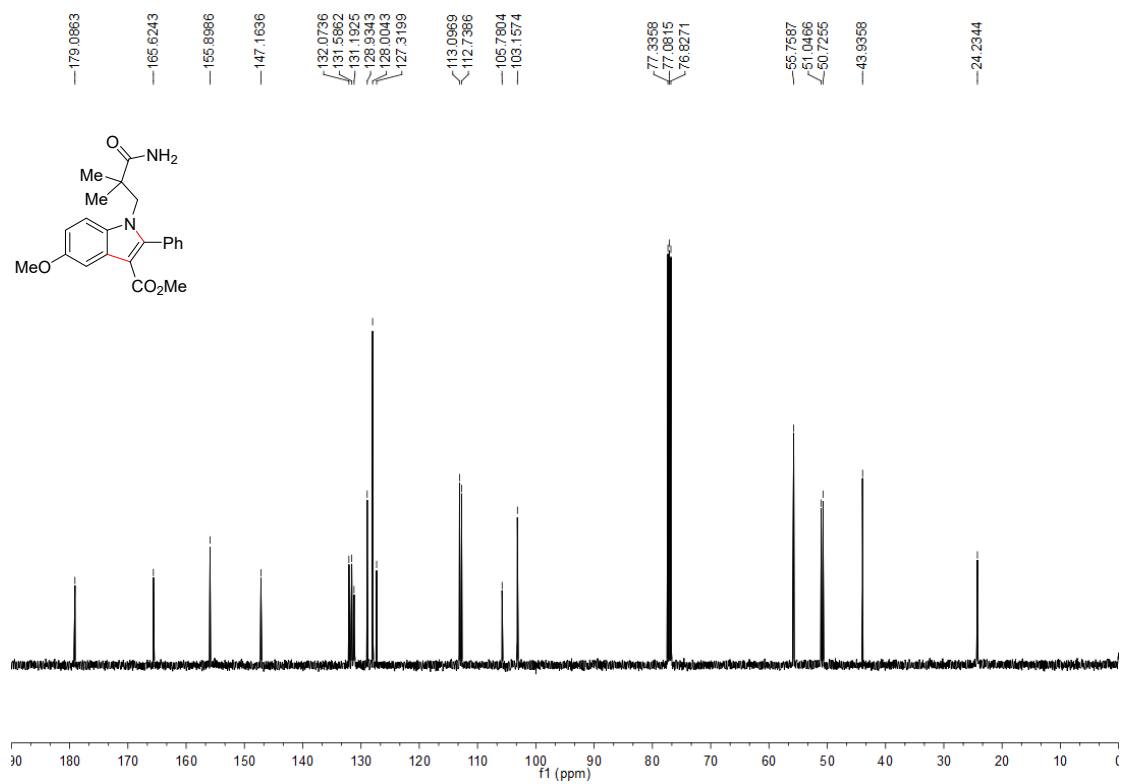



# 6c

## <sup>1</sup>H NMR

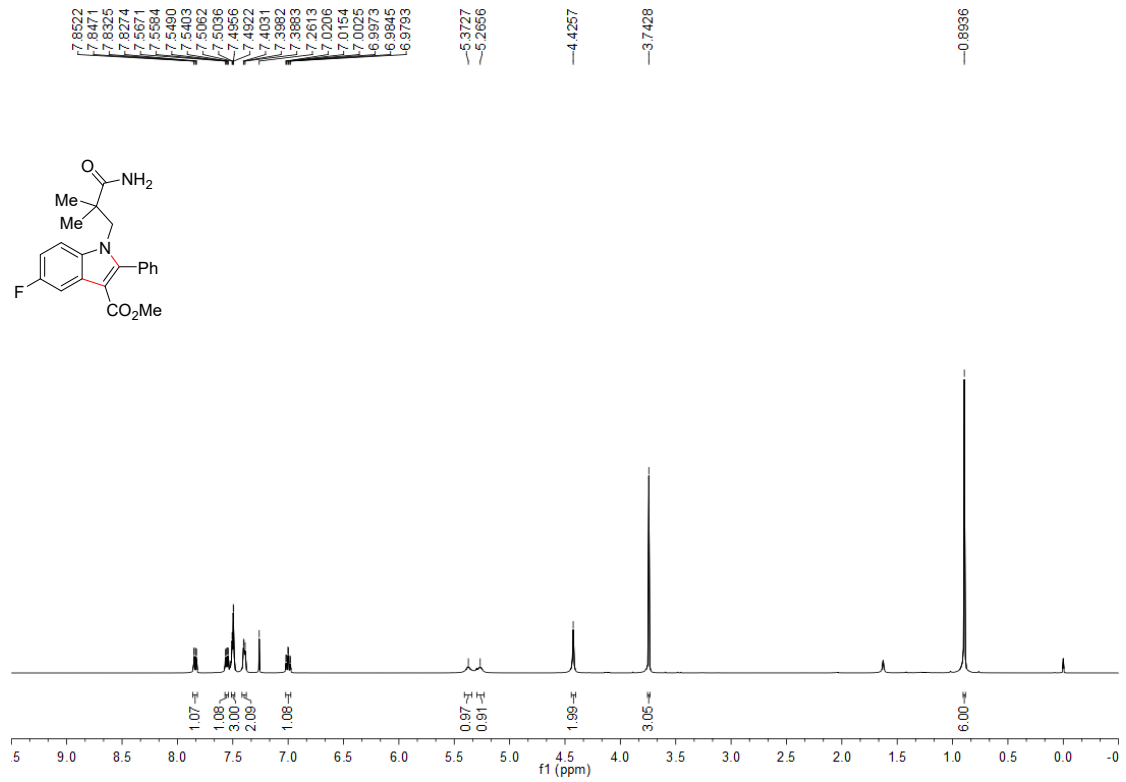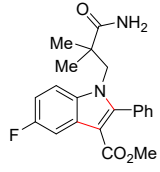

## <sup>13</sup>C NMR

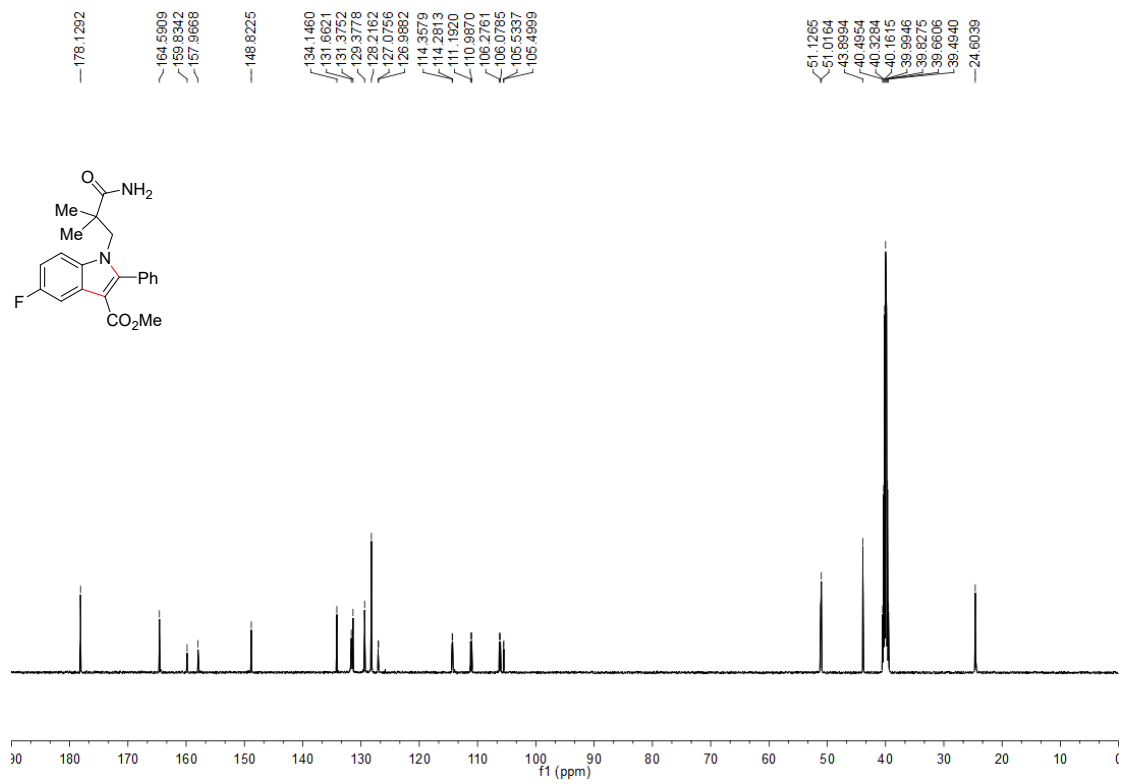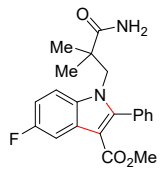

## 7c

 $^1\text{H NMR}$ 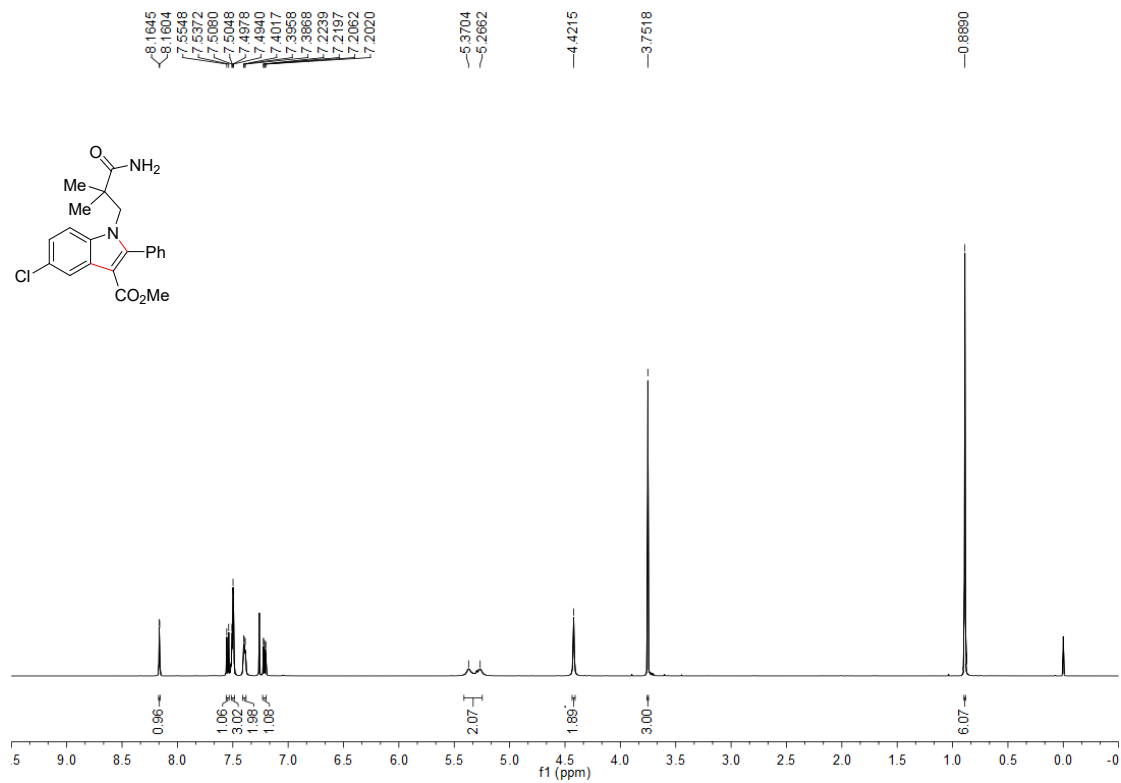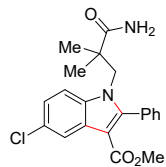 $^{13}\text{C NMR}$ 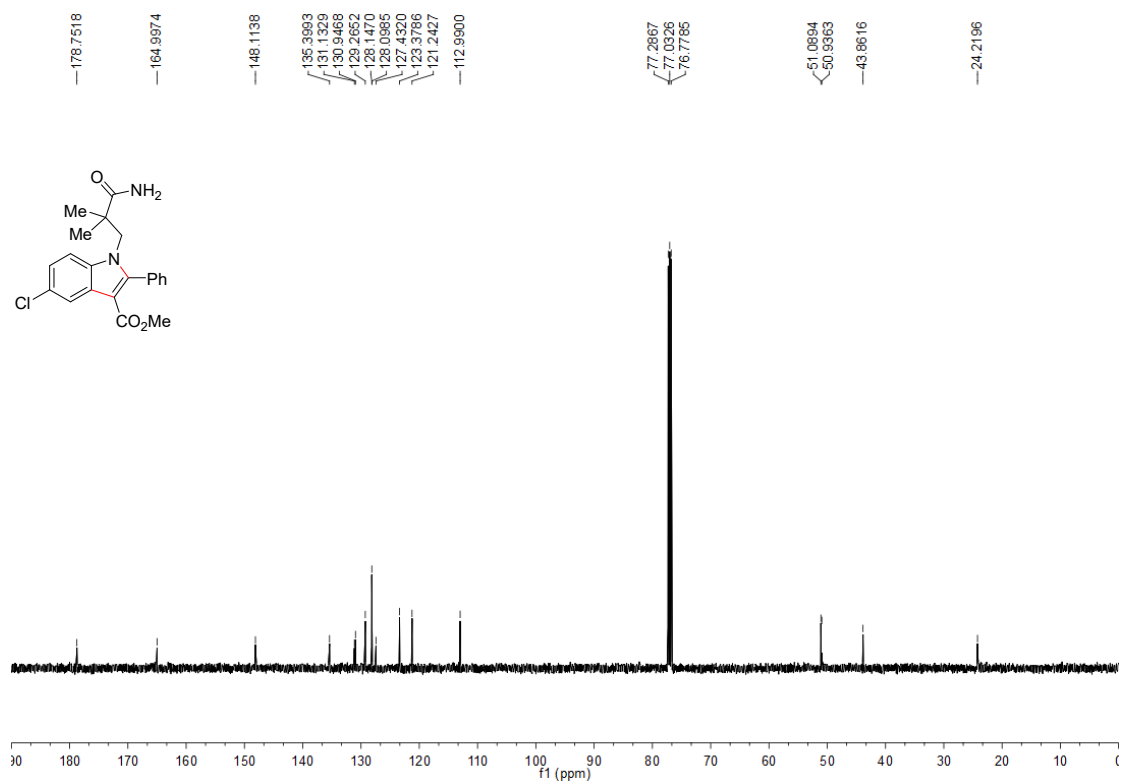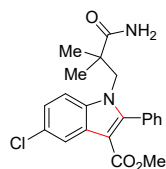

8c

<sup>1</sup>H NMR

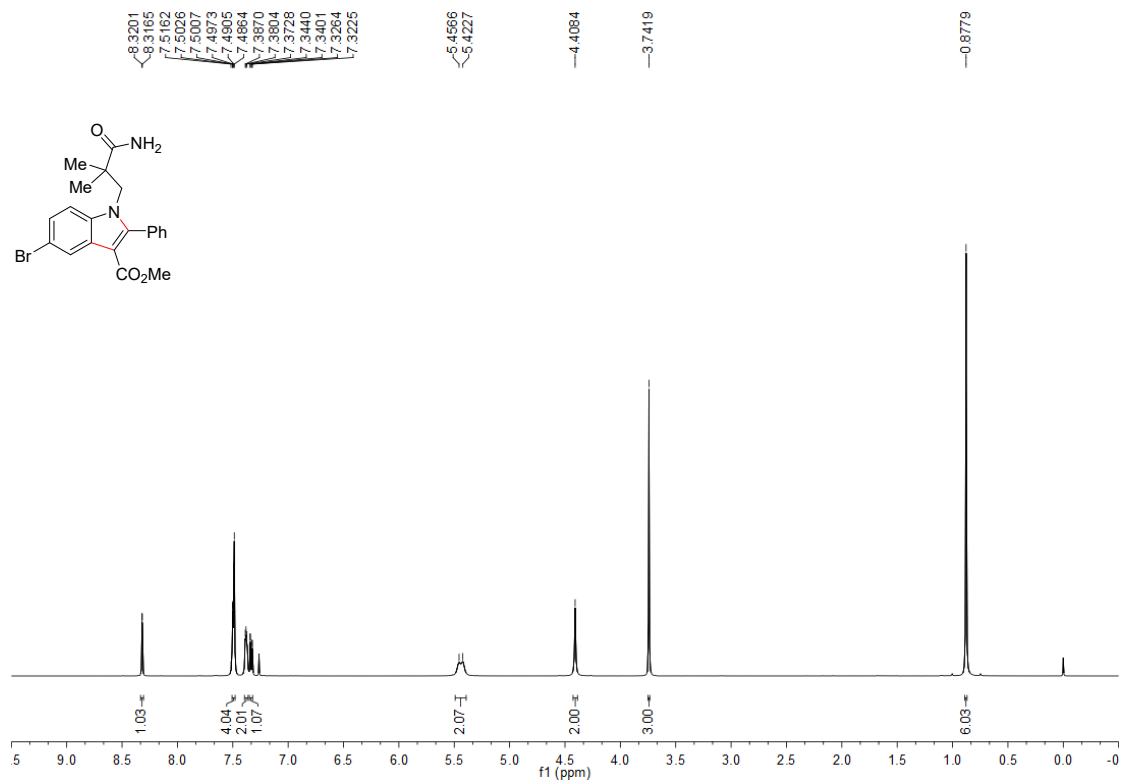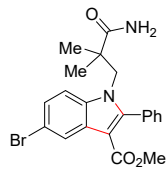

<sup>13</sup>C NMR

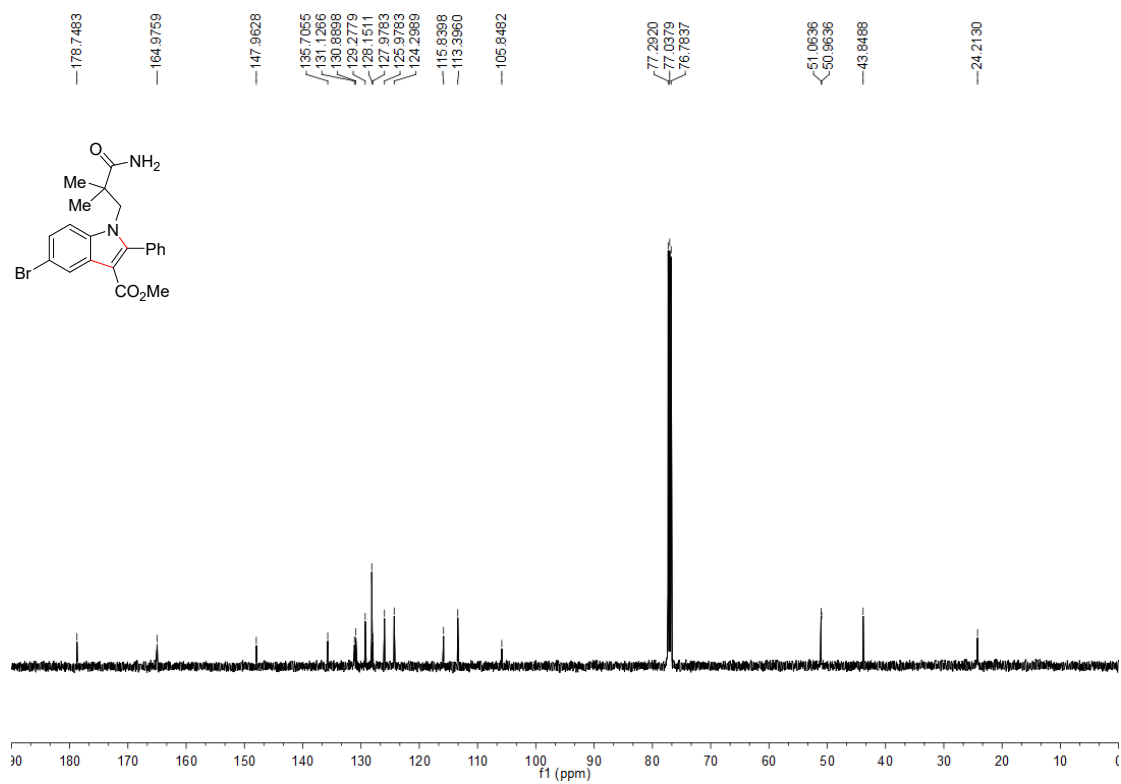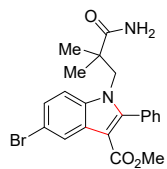

# 9c

## <sup>1</sup>H NMR

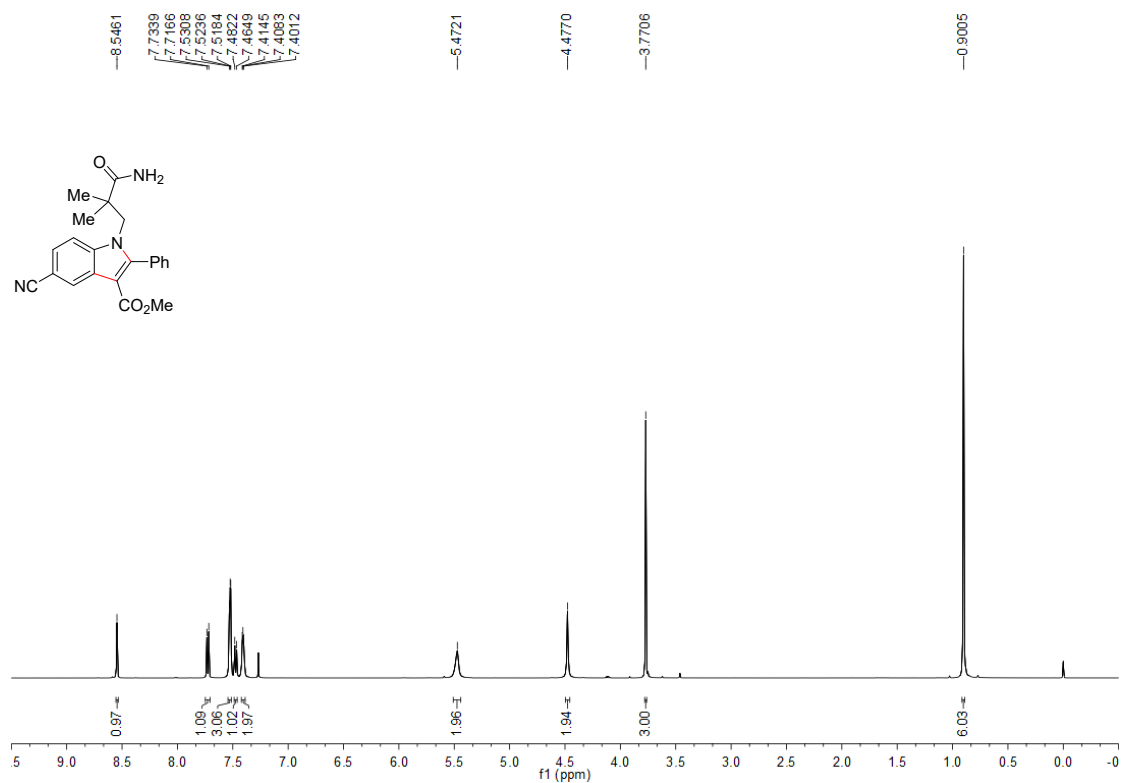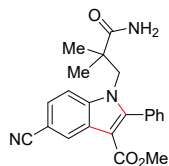

## <sup>13</sup>C NMR

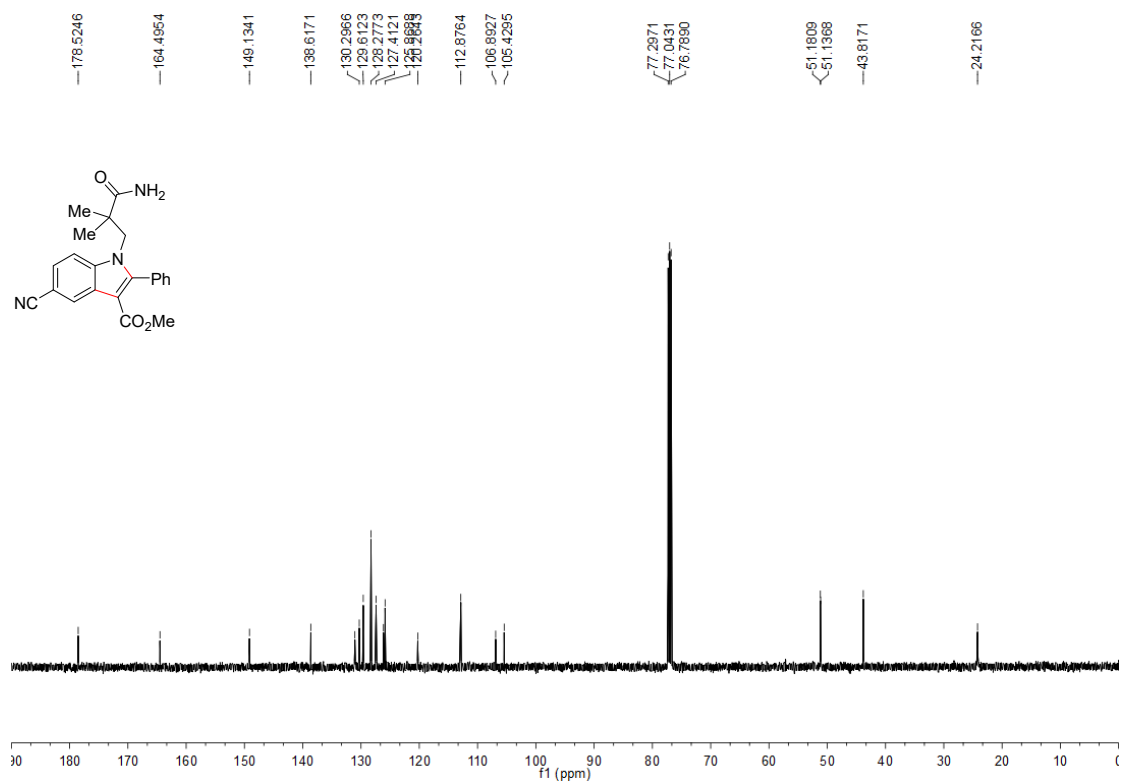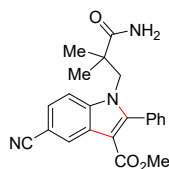

# 10c

## <sup>1</sup>H NMR

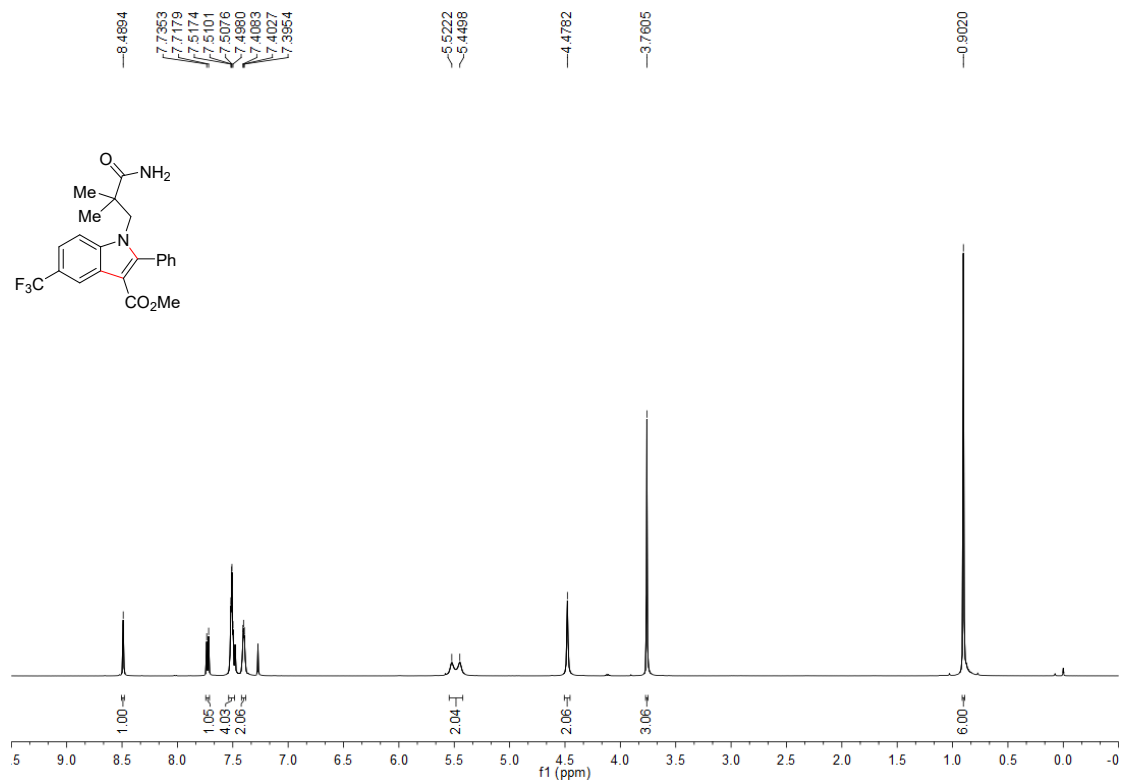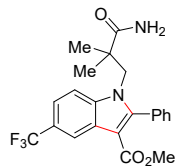

## <sup>13</sup>C NMR

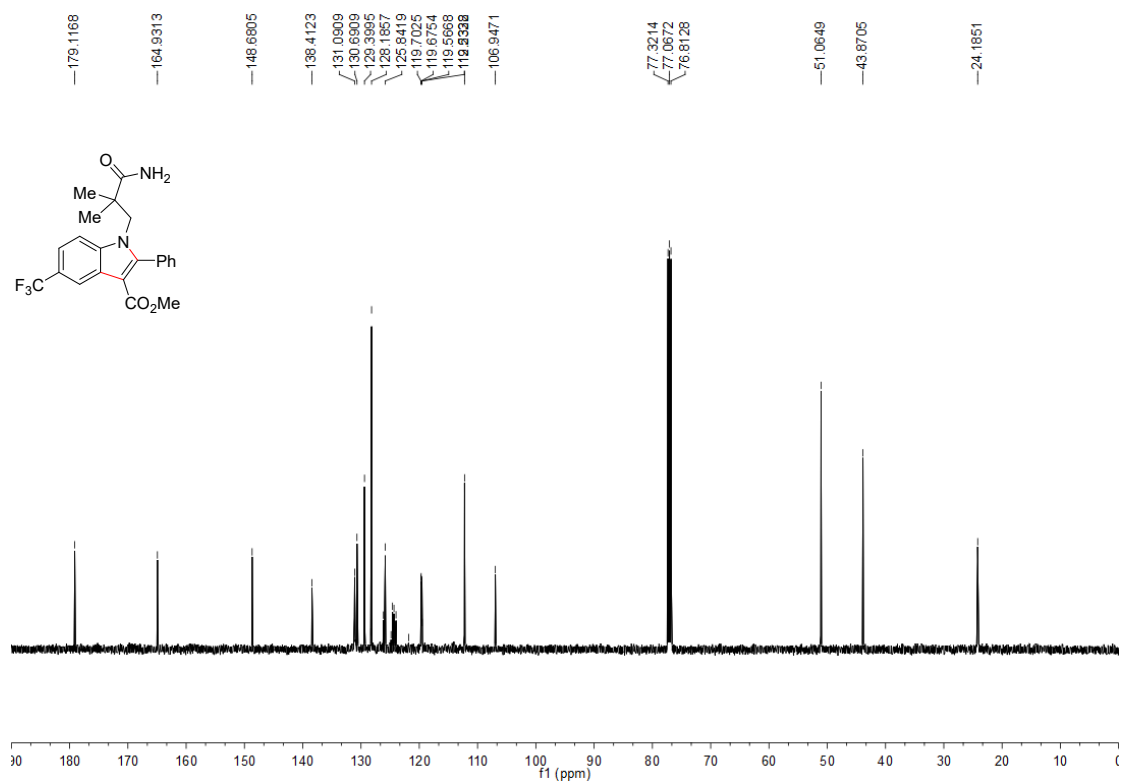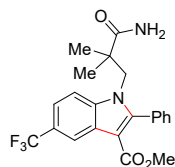

# 11c

## <sup>1</sup>H NMR

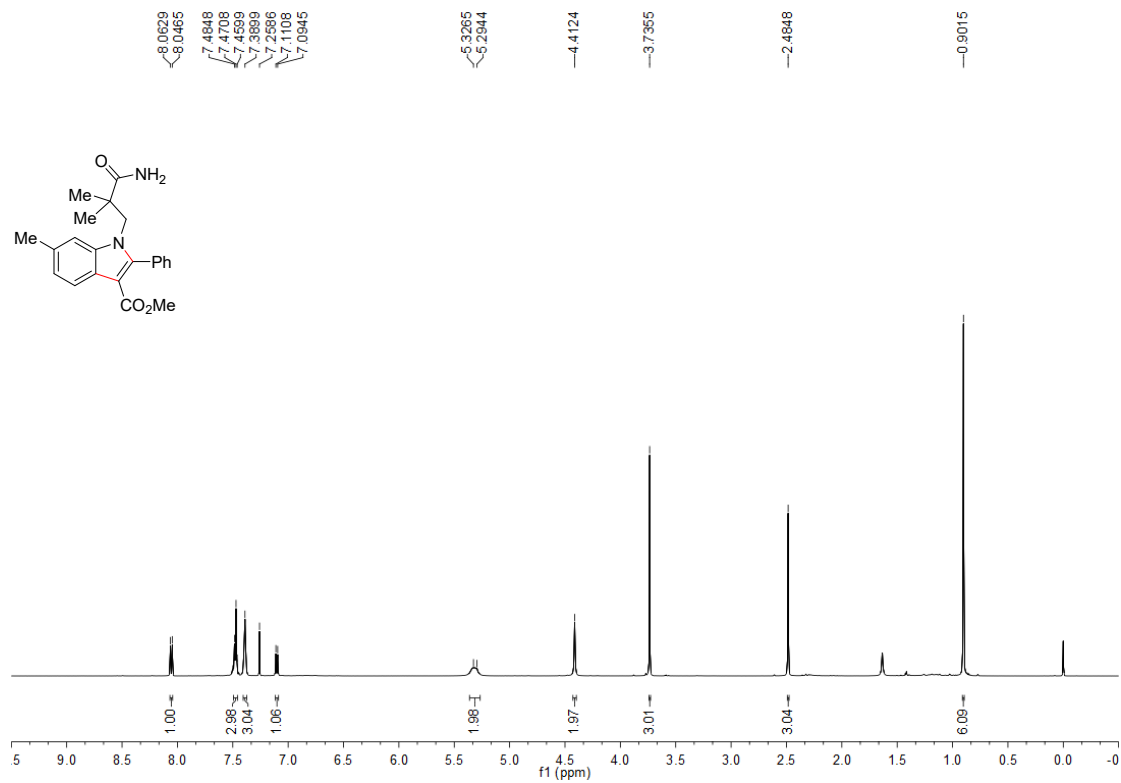

## <sup>13</sup>C NMR

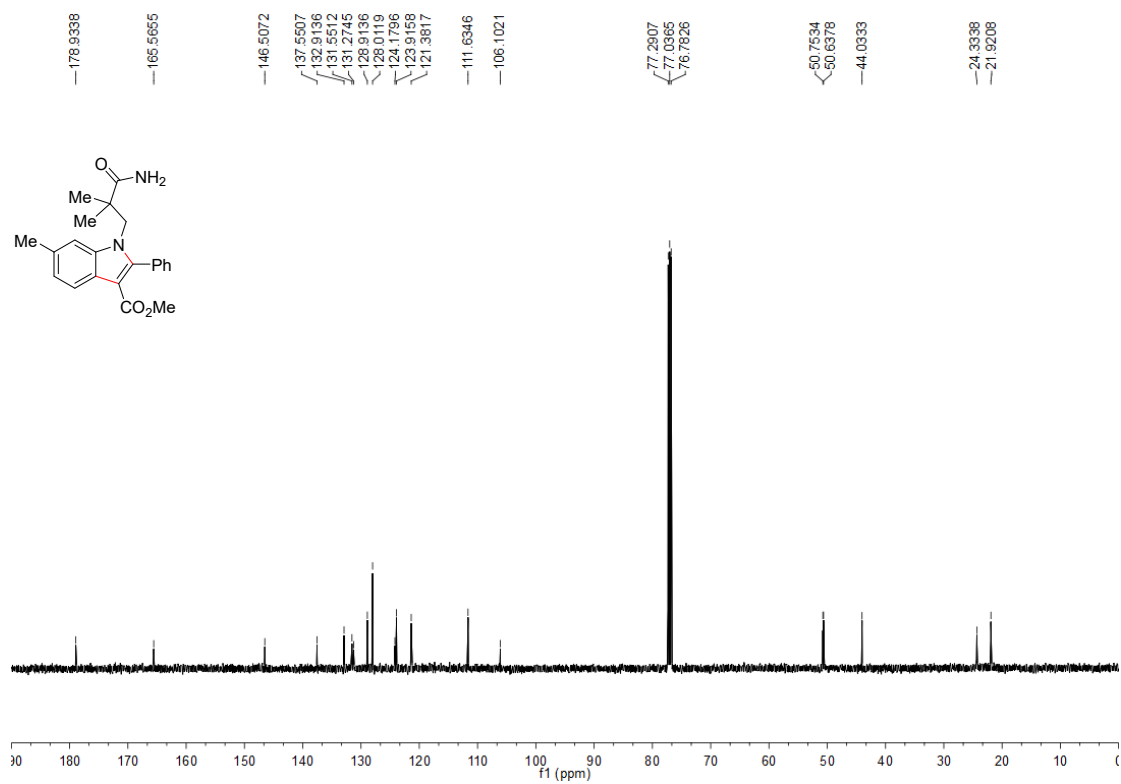

# 12c

## <sup>1</sup>H NMR

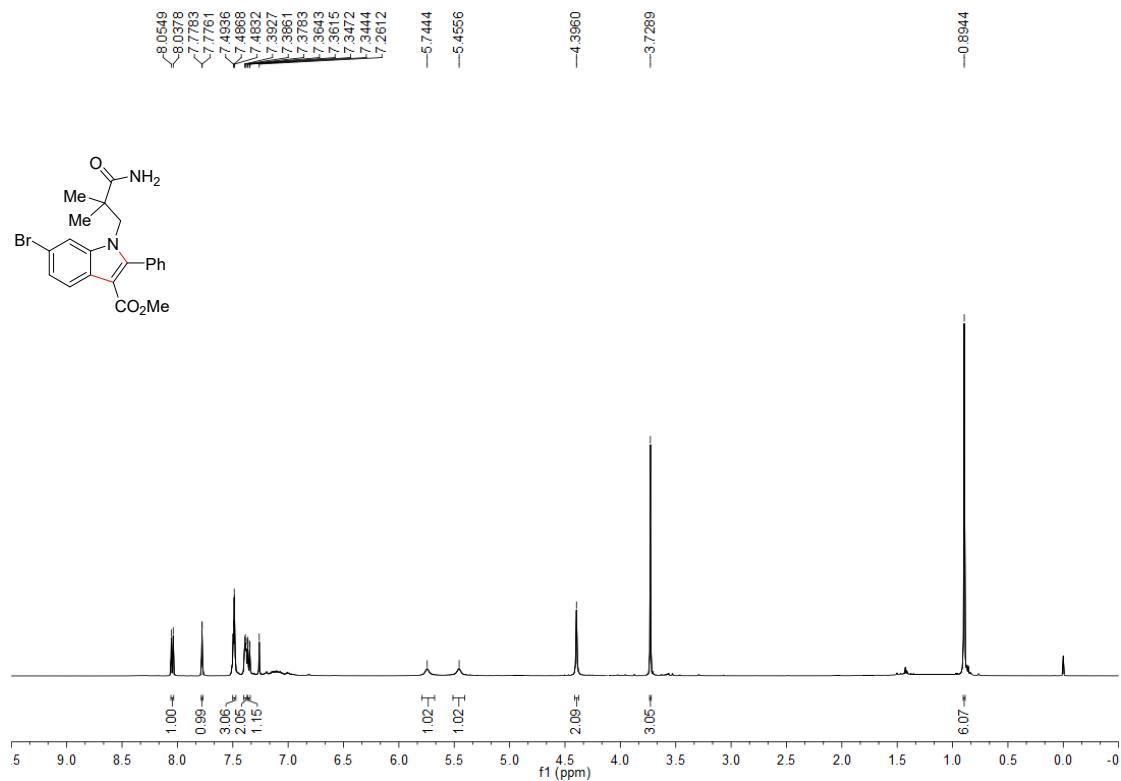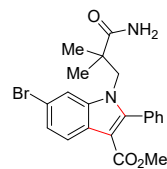

## <sup>13</sup>C NMR

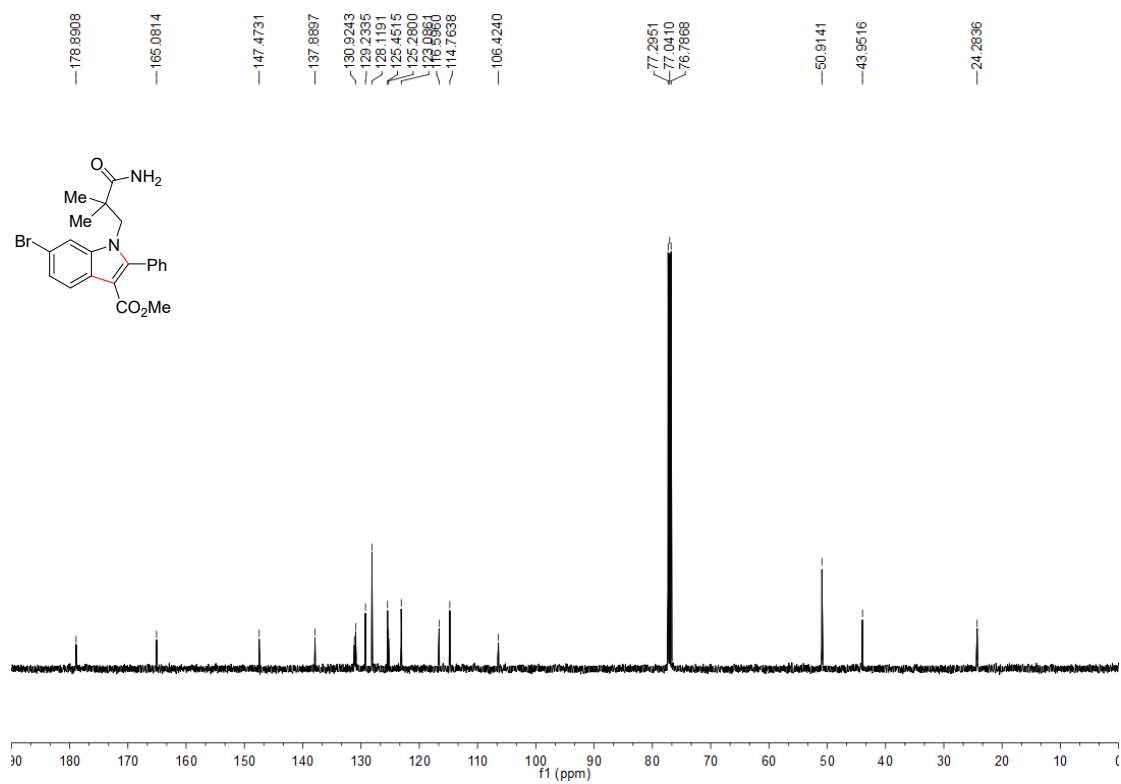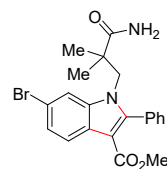

# 13c

## <sup>1</sup>H NMR

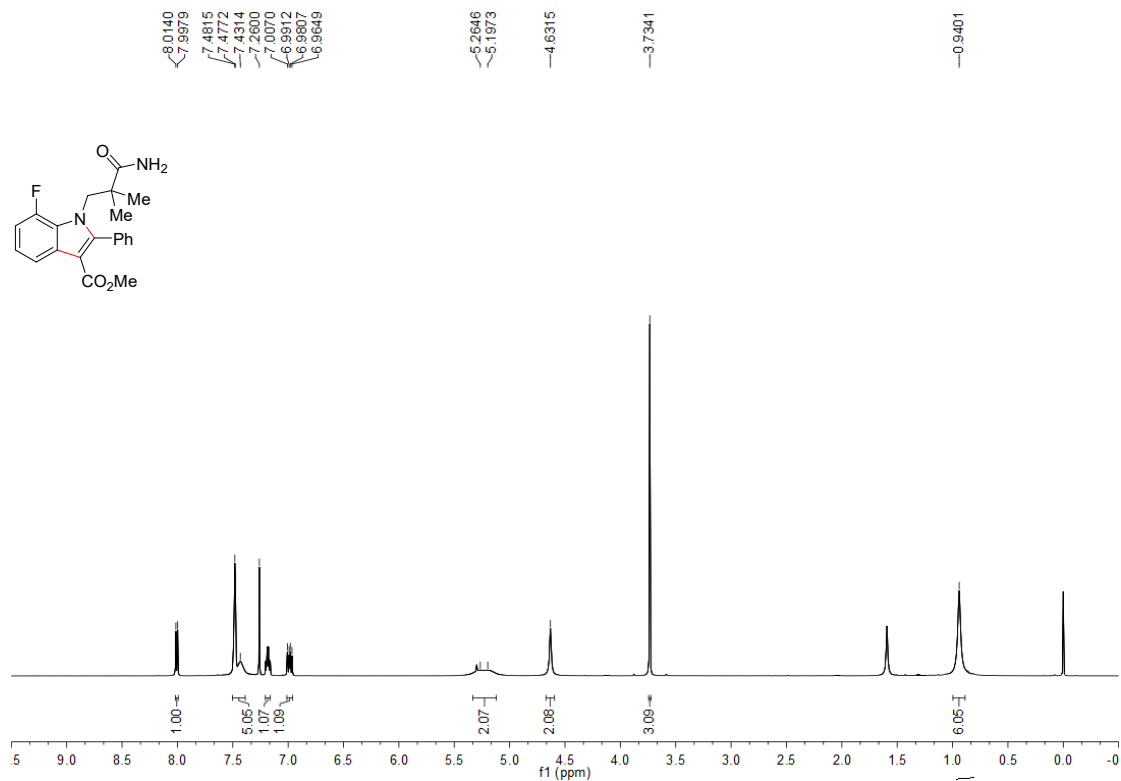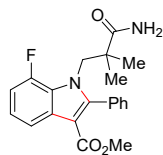

## <sup>13</sup>C NMR

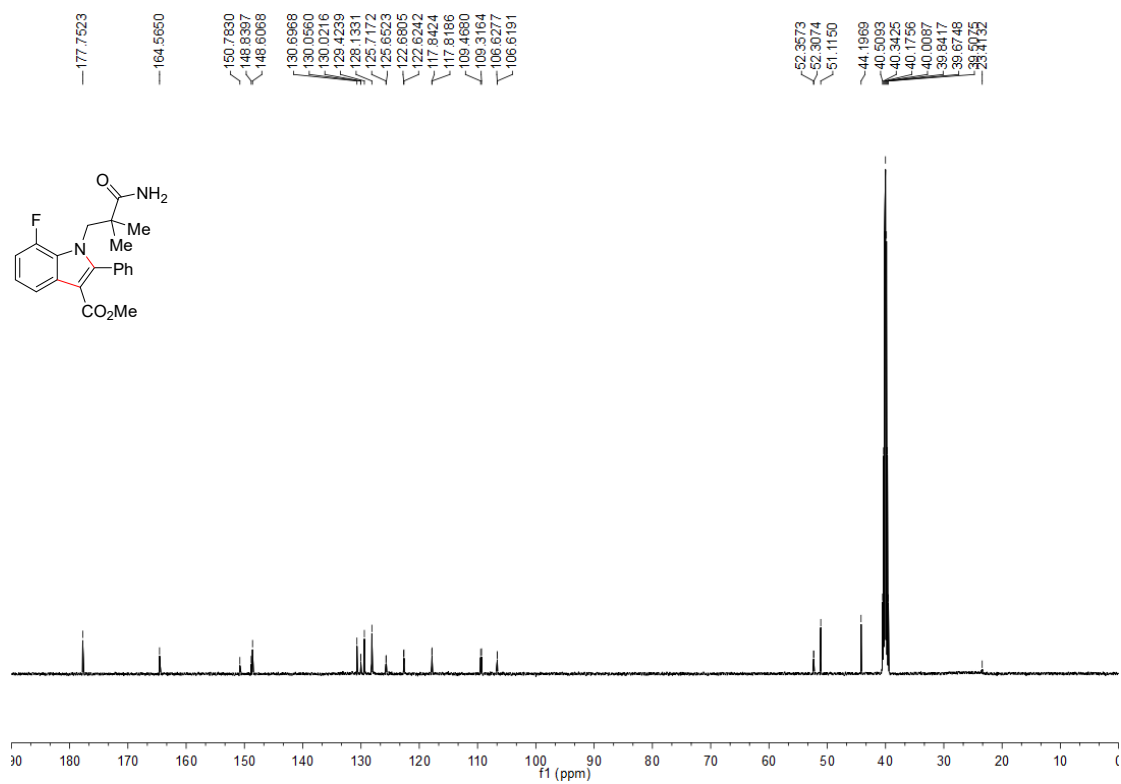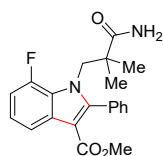



# 14c

## <sup>1</sup>H NMR

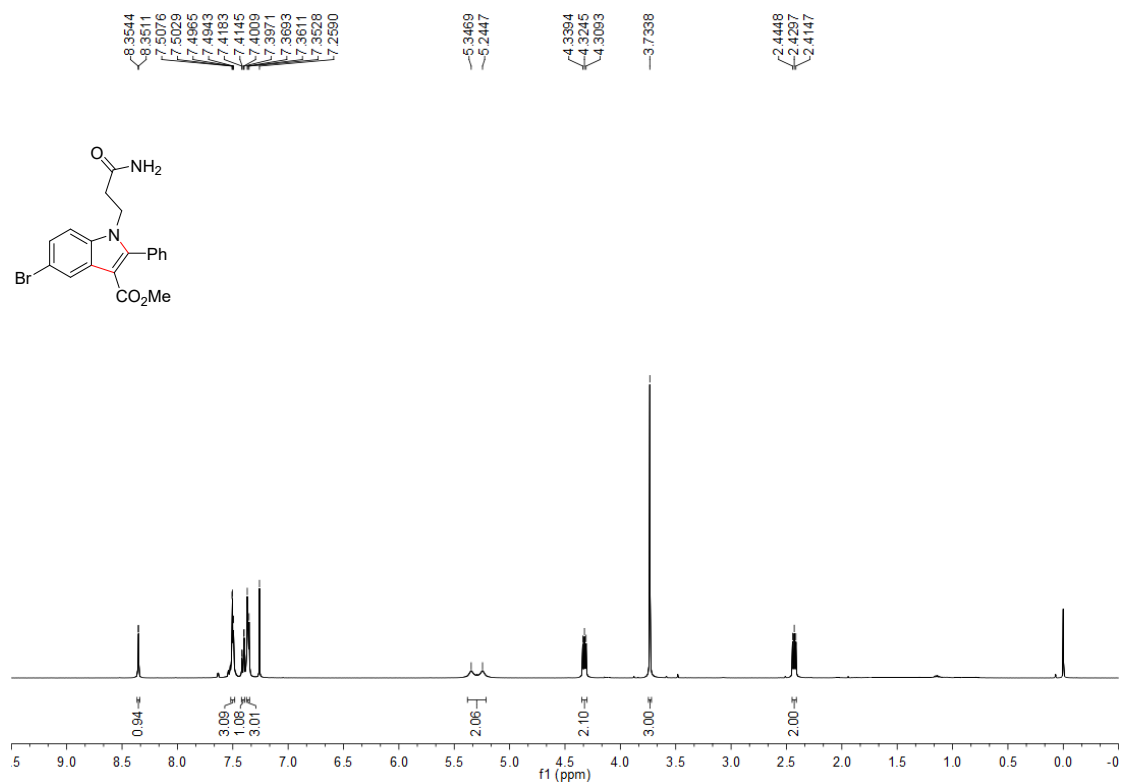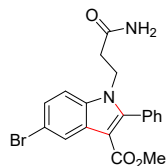

## <sup>13</sup>C NMR

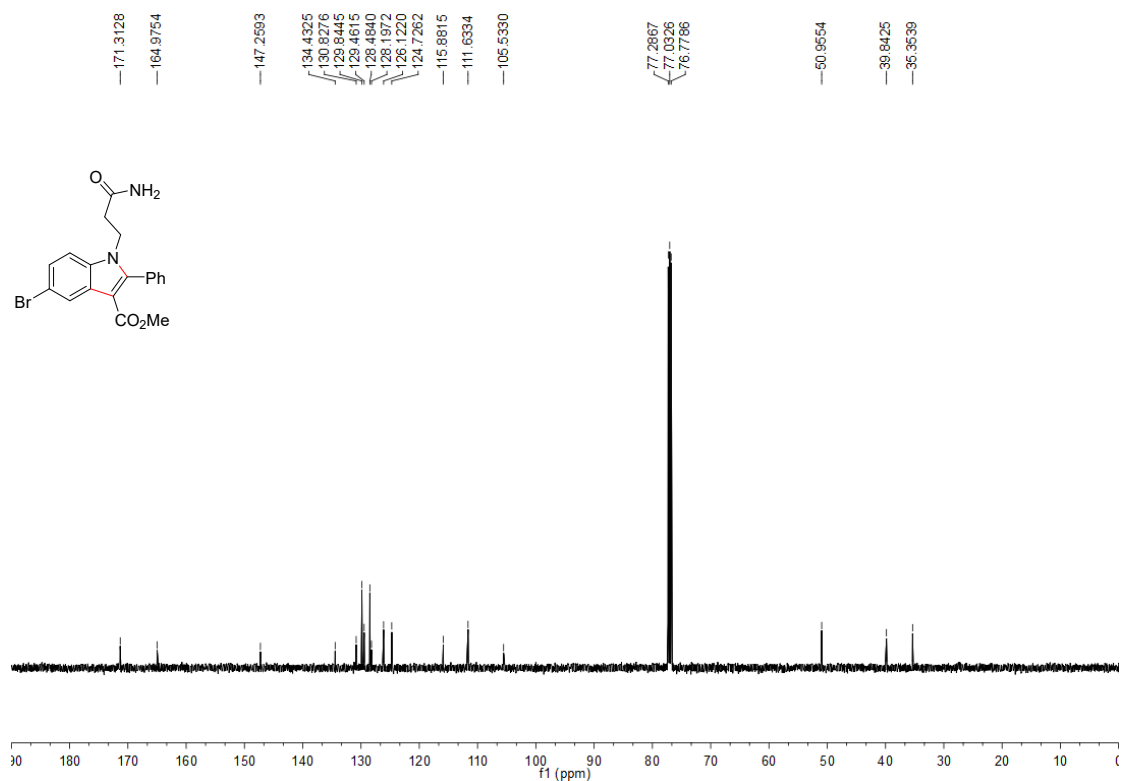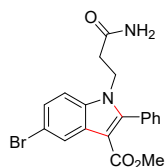

# 15c

## <sup>1</sup>H NMR

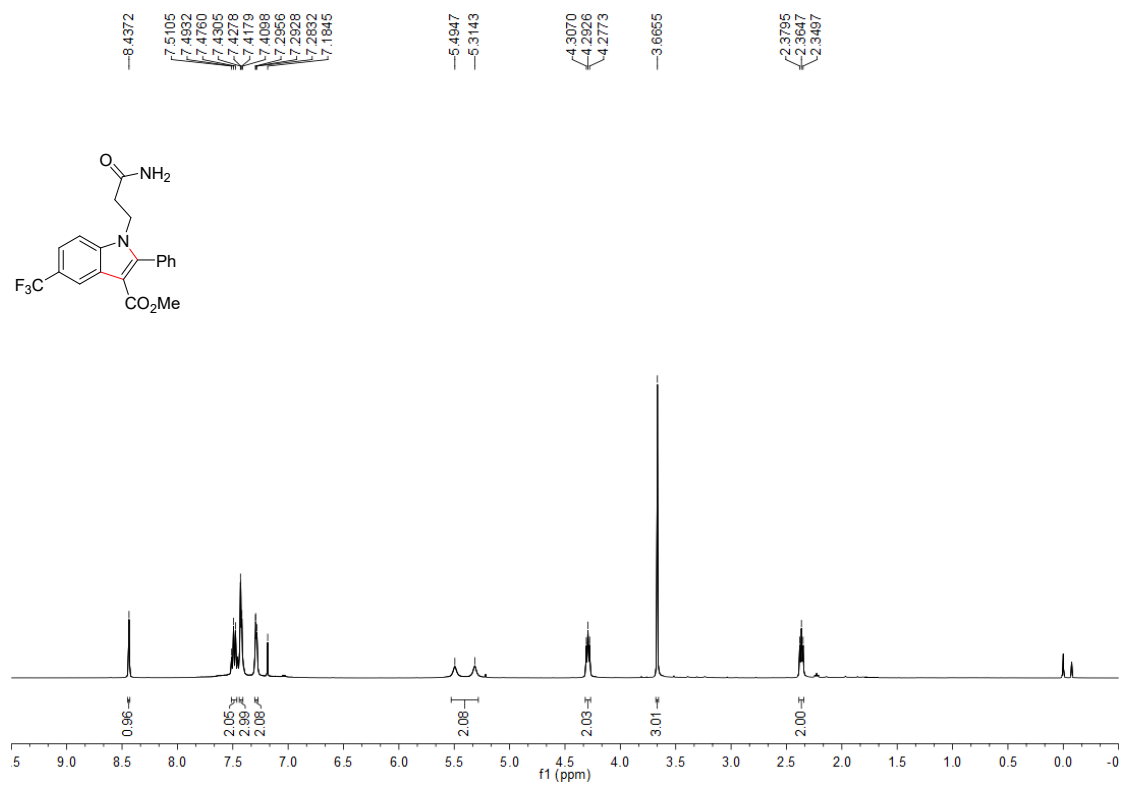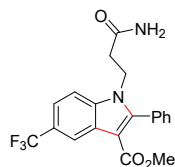

## <sup>13</sup>C NMR

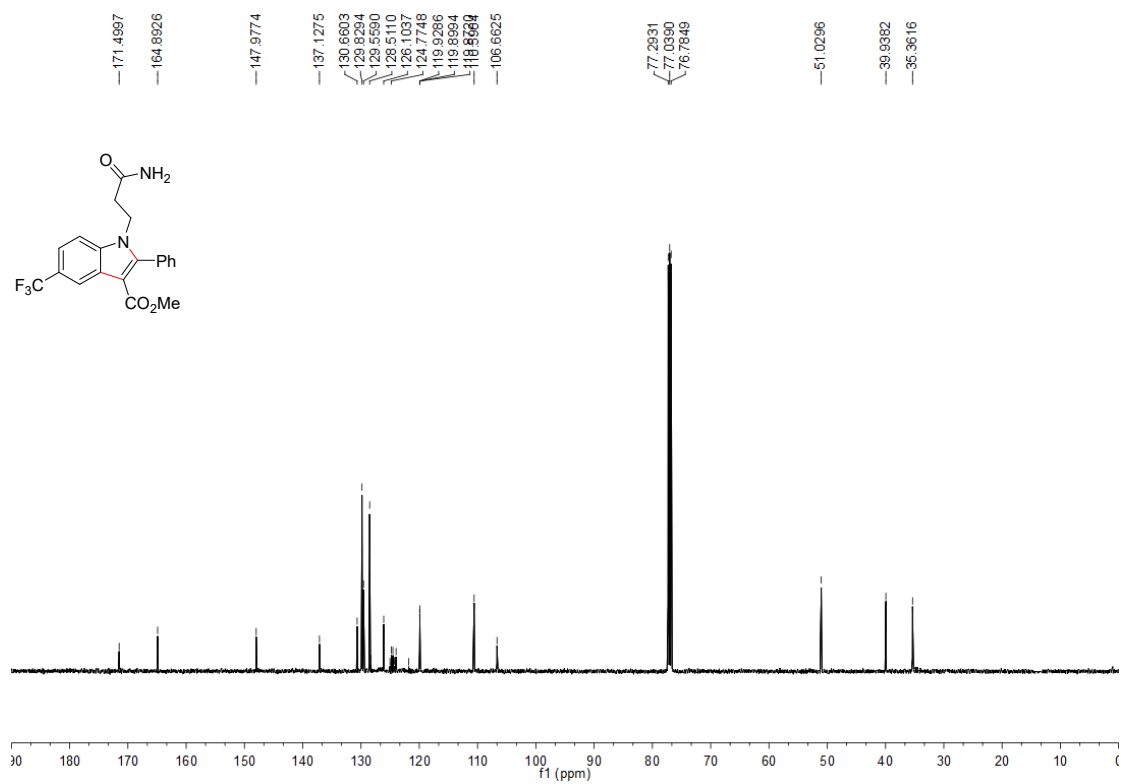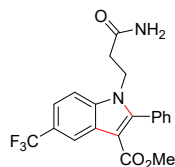

# 16c

## <sup>1</sup>H NMR

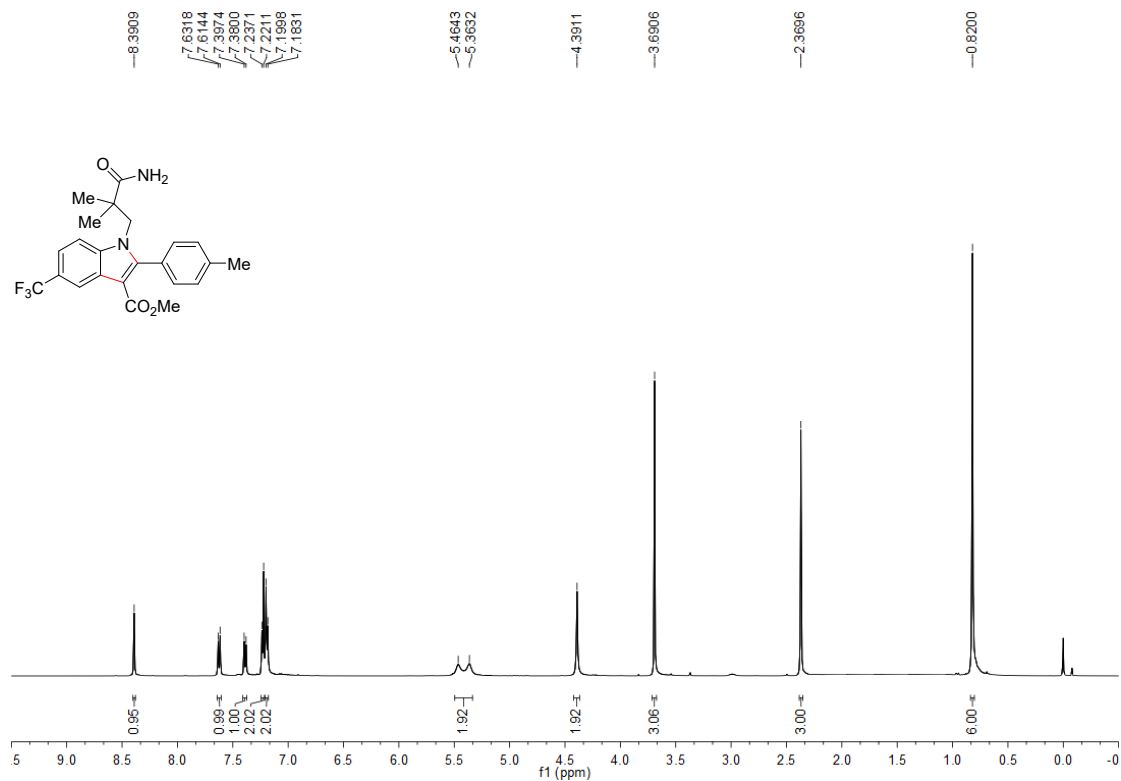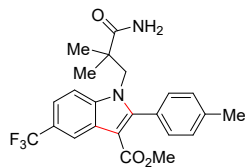

## <sup>13</sup>C NMR

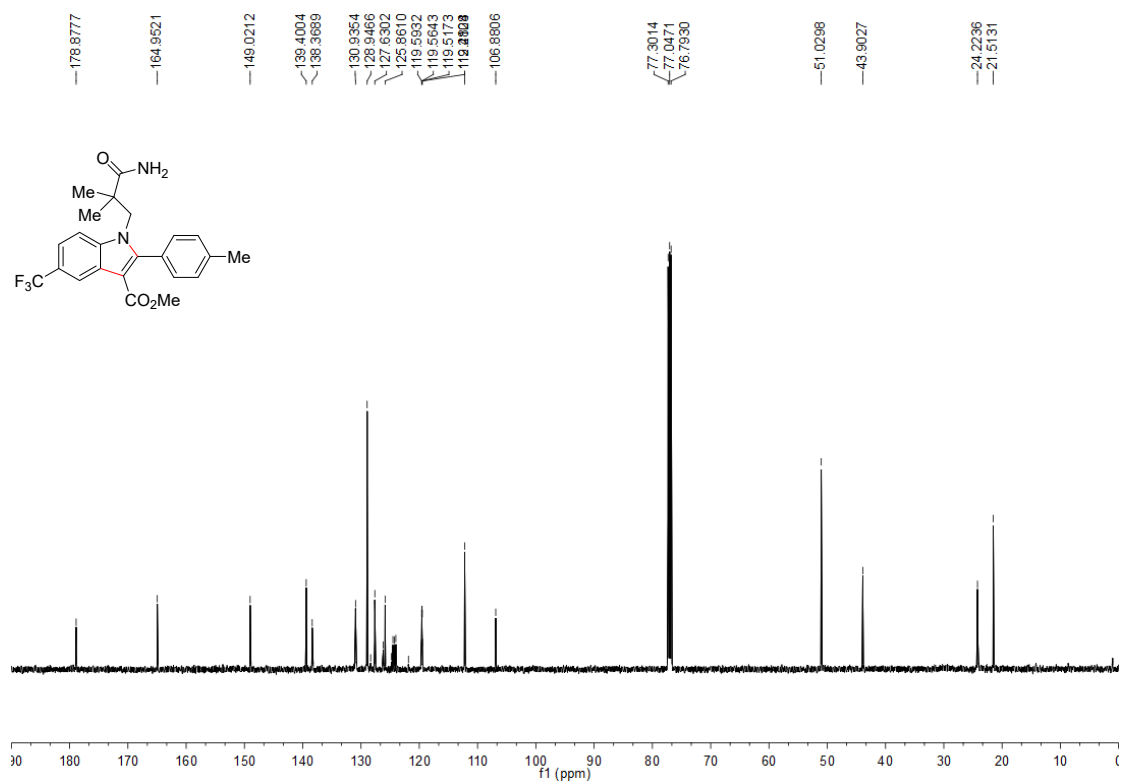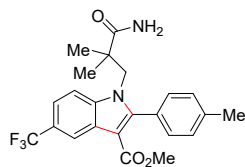

17c

<sup>1</sup>H NMR

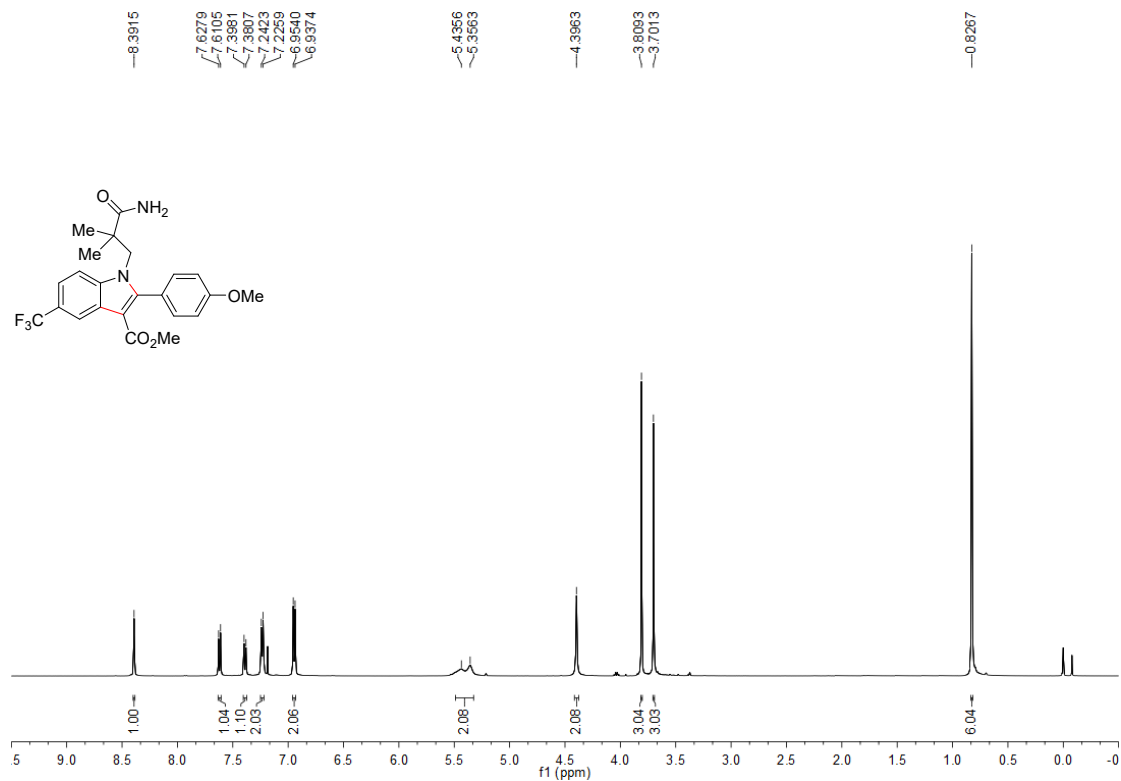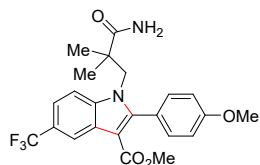

<sup>13</sup>C NMR

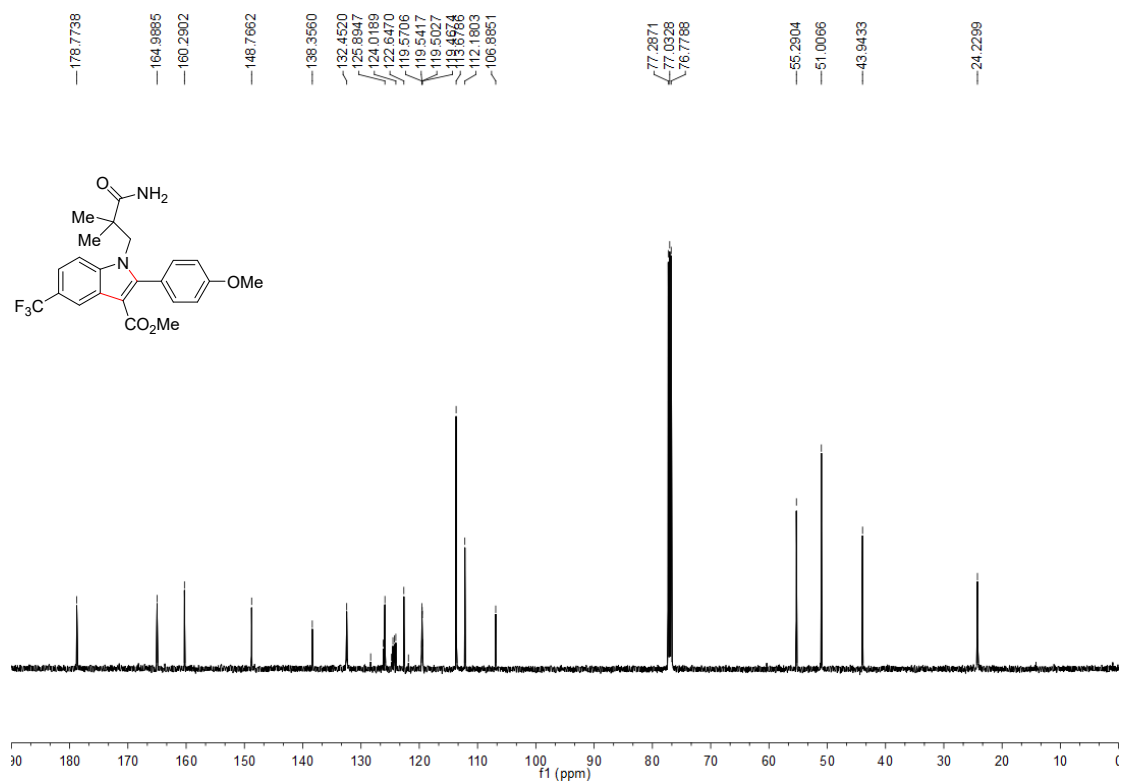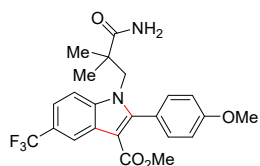

# 18c

## <sup>1</sup>H NMR

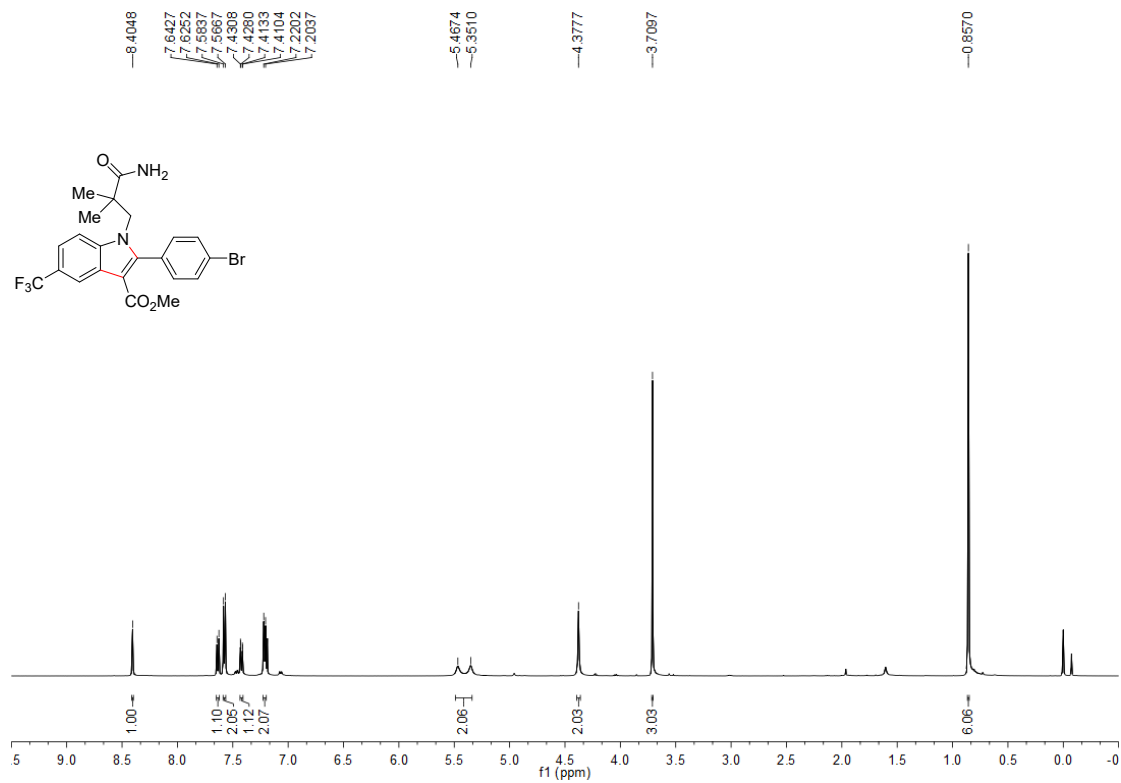

## <sup>13</sup>C NMR

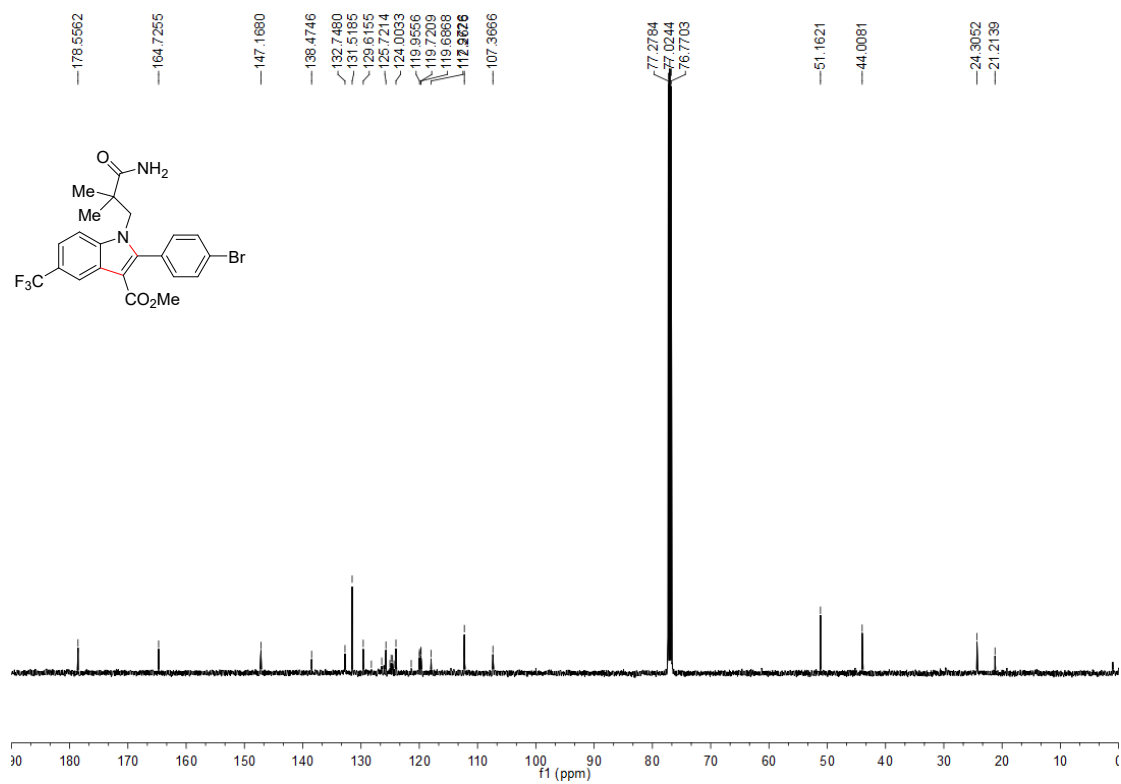

# 19c

## <sup>1</sup>H NMR

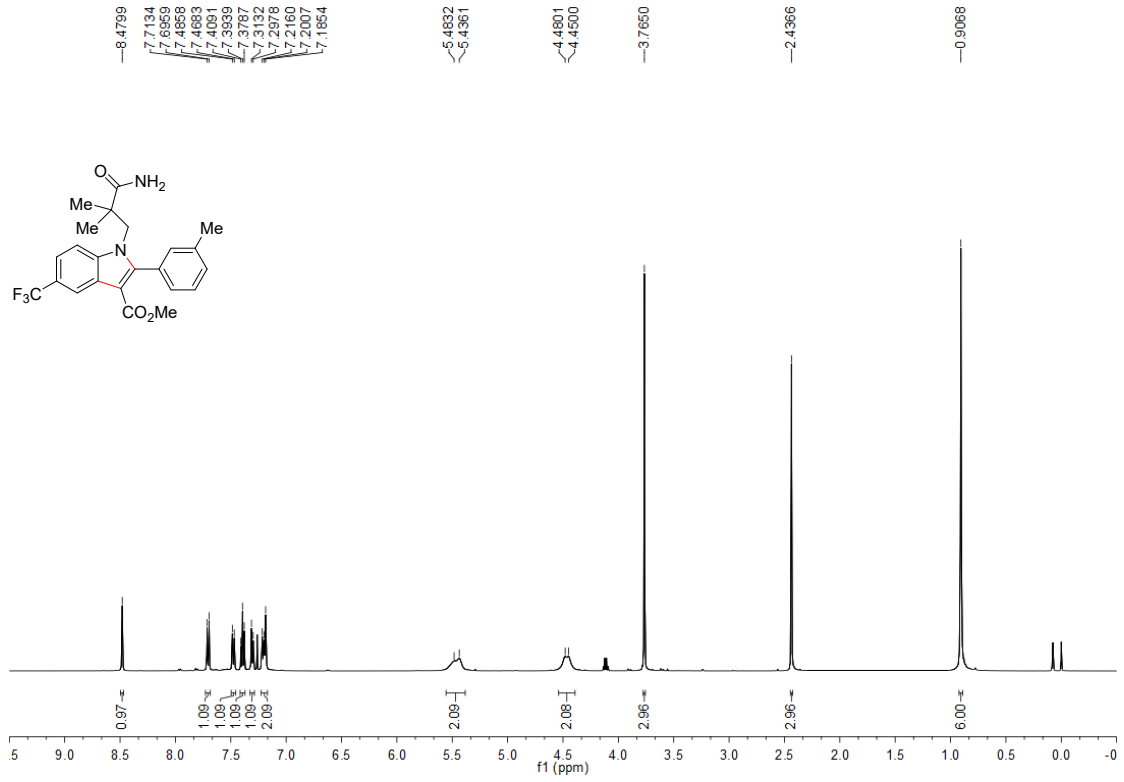

## <sup>13</sup>C NMR

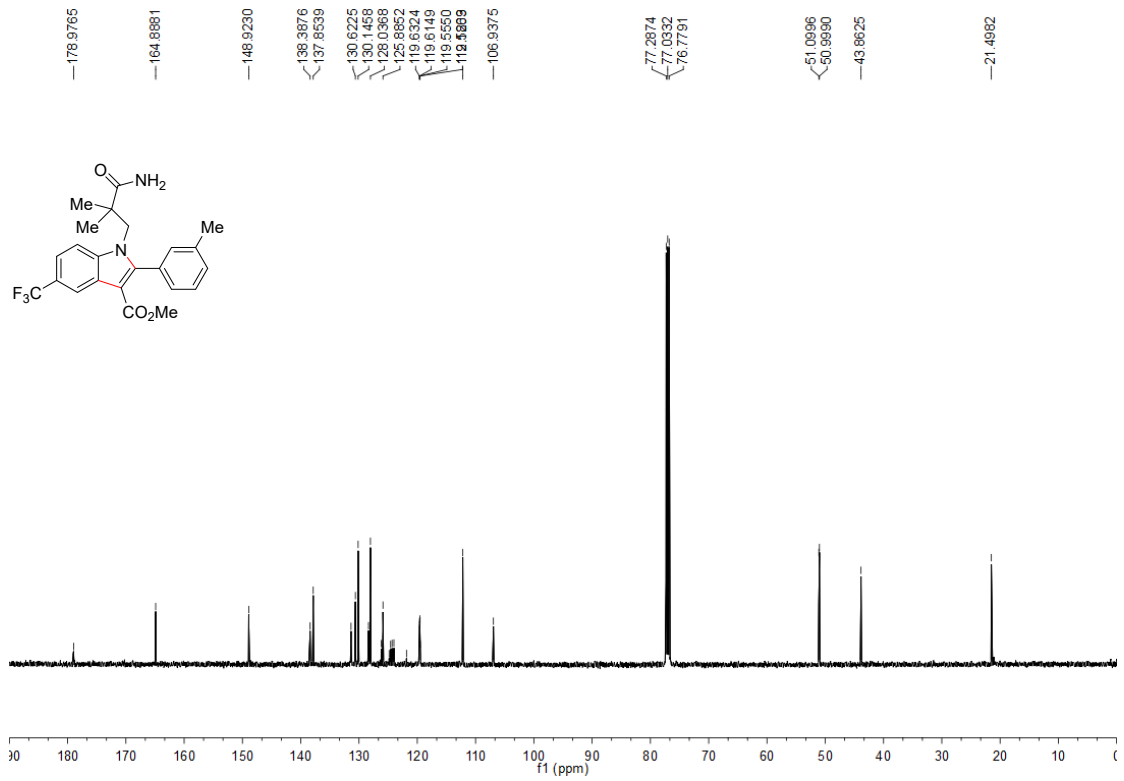

## 20c

<sup>1</sup>H NMR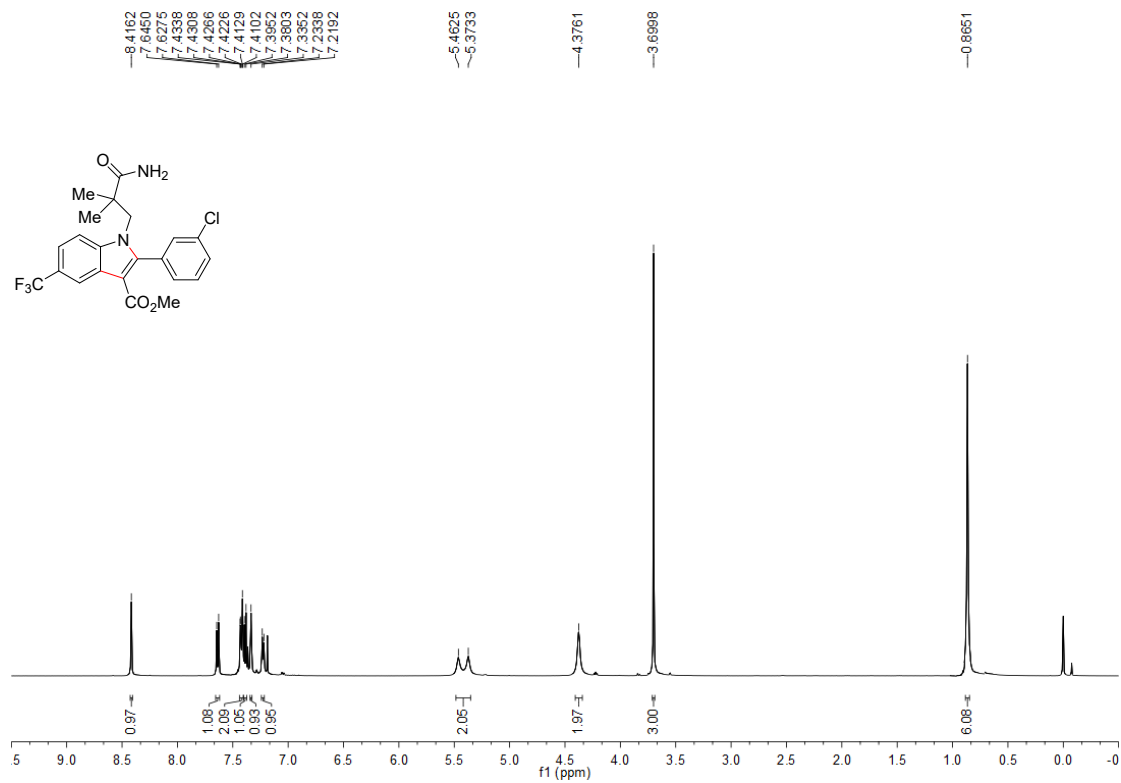<sup>13</sup>C NMR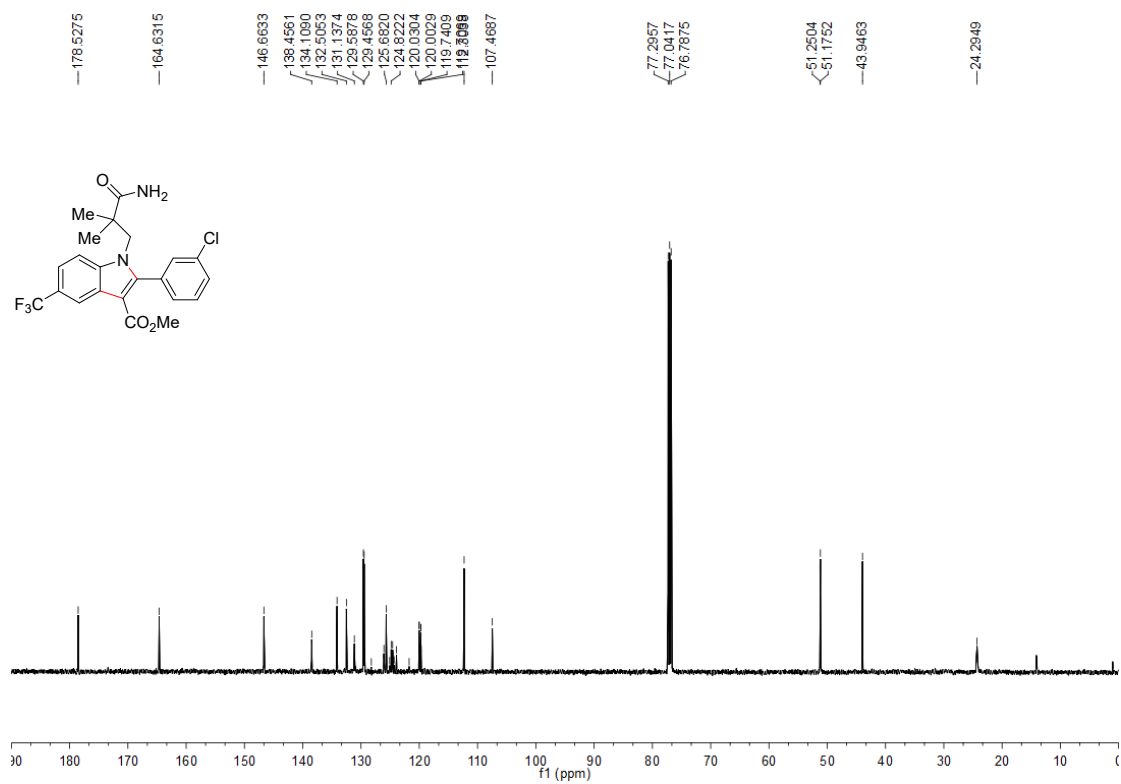

# 21c

## <sup>1</sup>H NMR

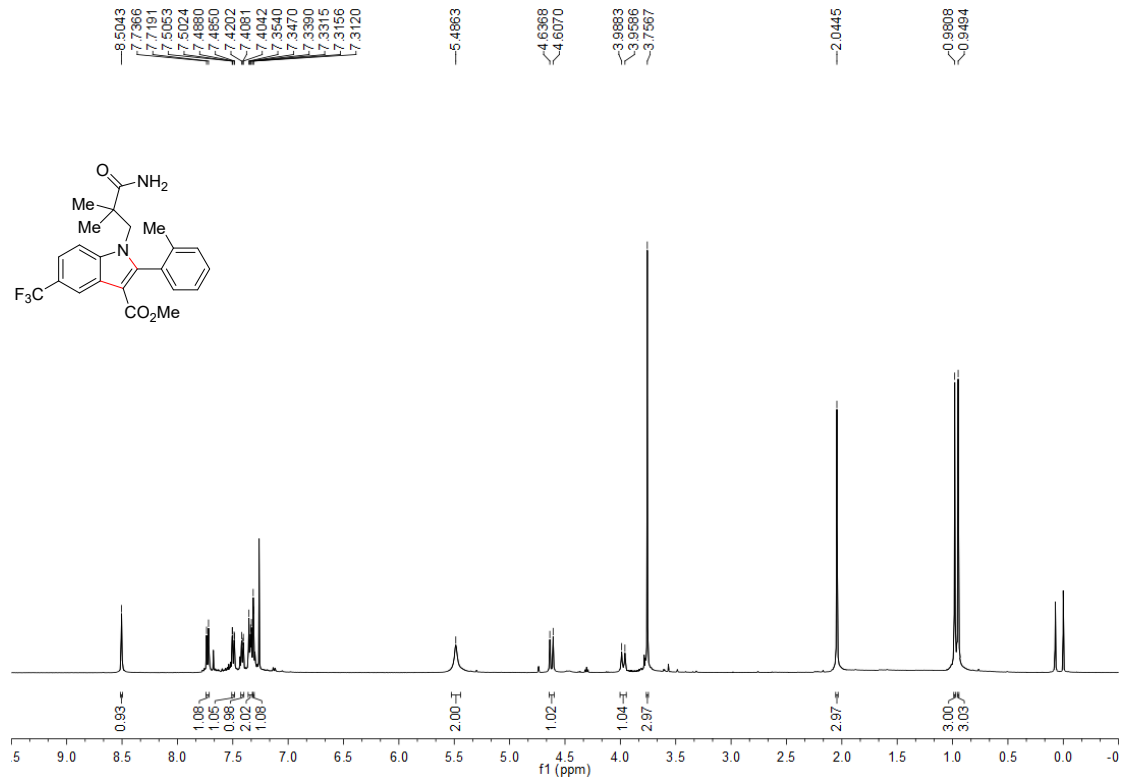

## <sup>13</sup>C NMR

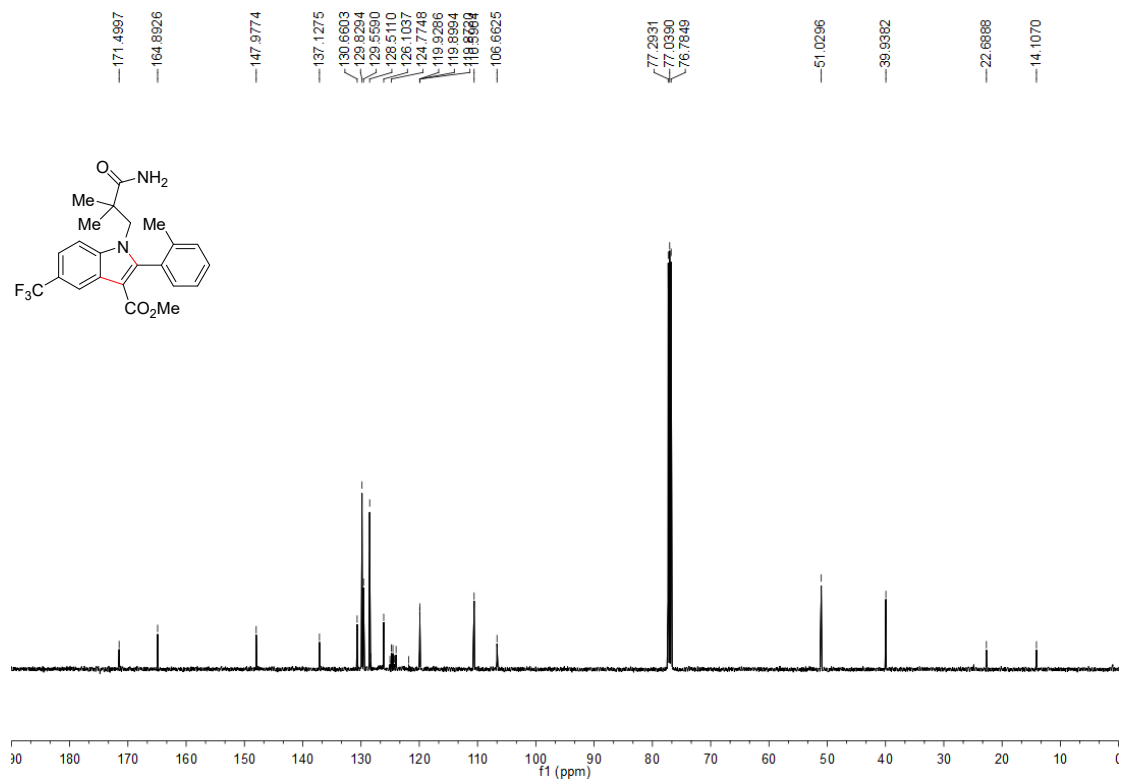



22c

<sup>1</sup>H NMR

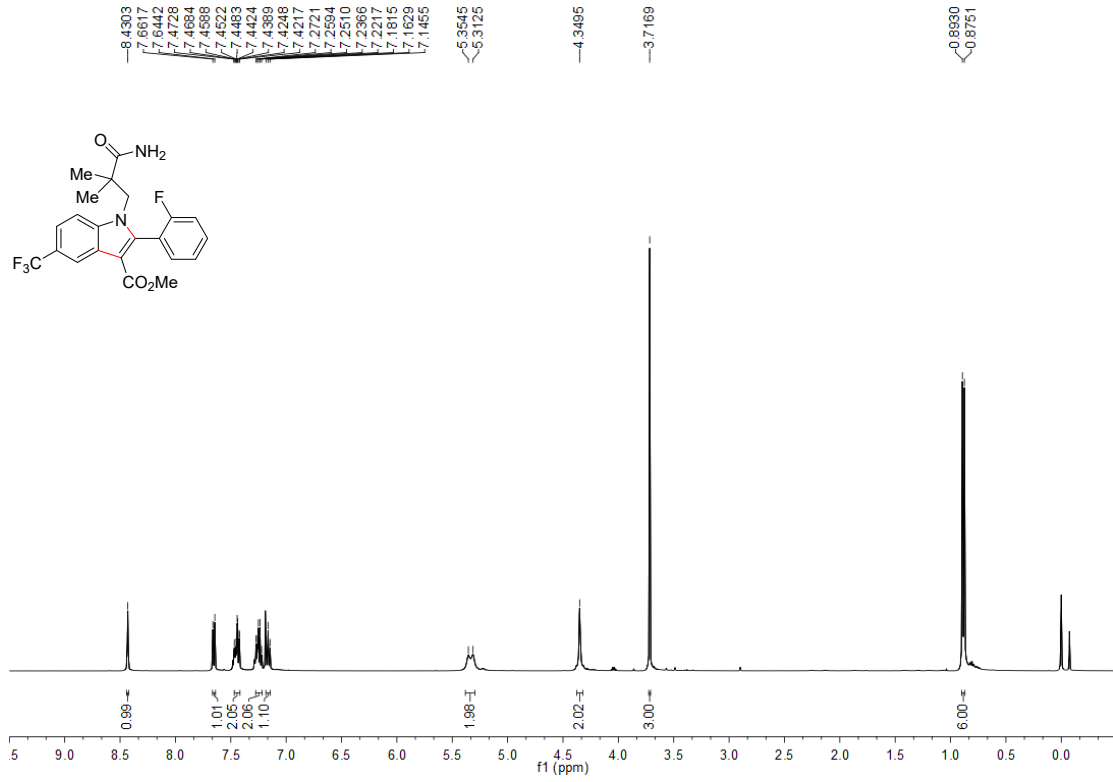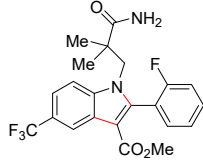

<sup>13</sup>C NMR

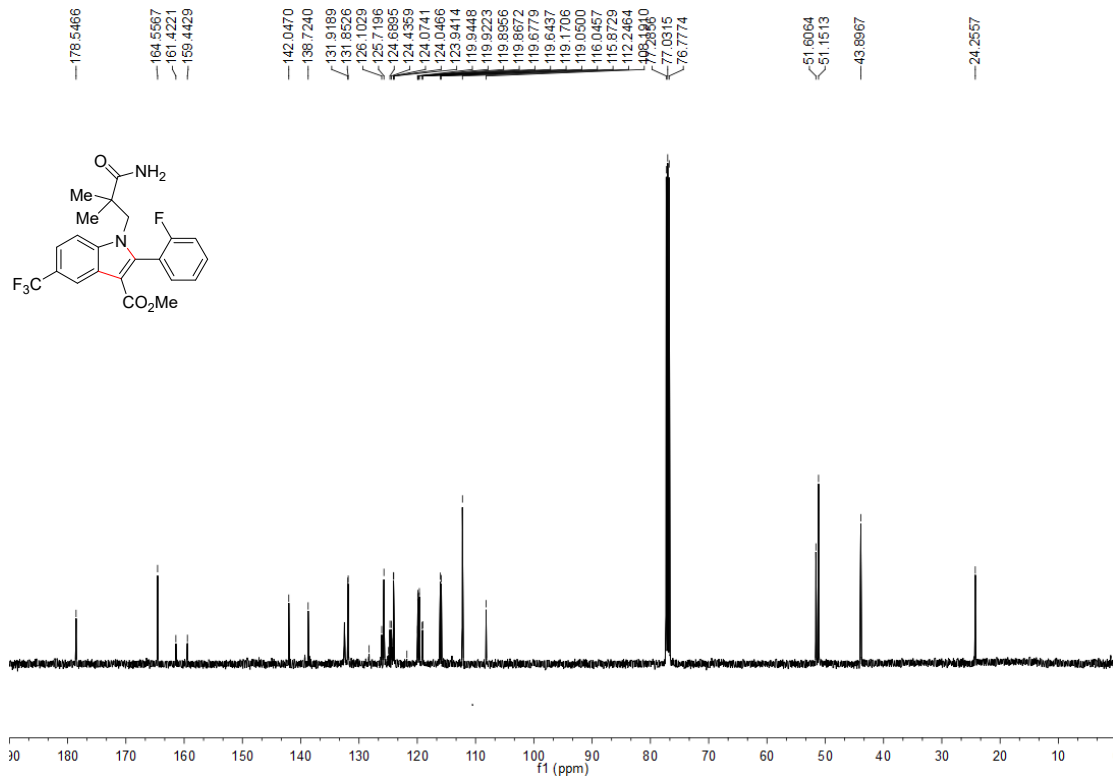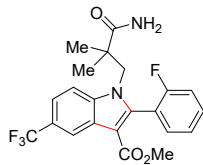

# 23c

## <sup>1</sup>H NMR

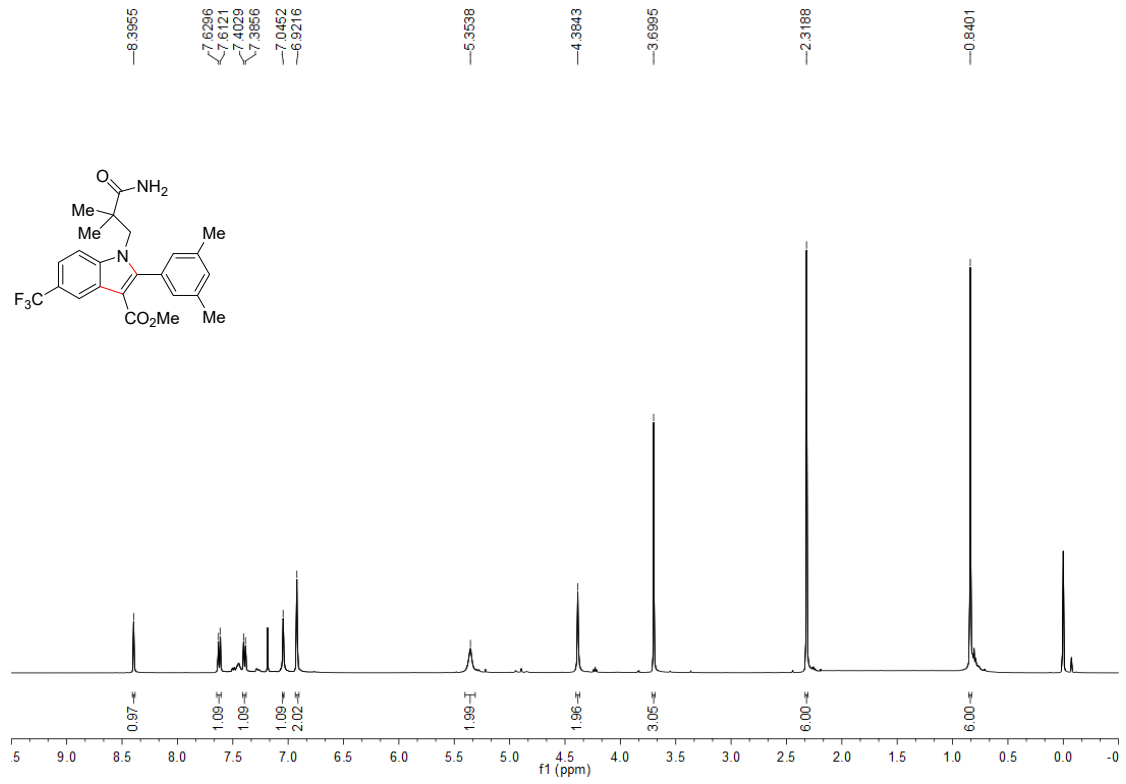

## <sup>13</sup>C NMR

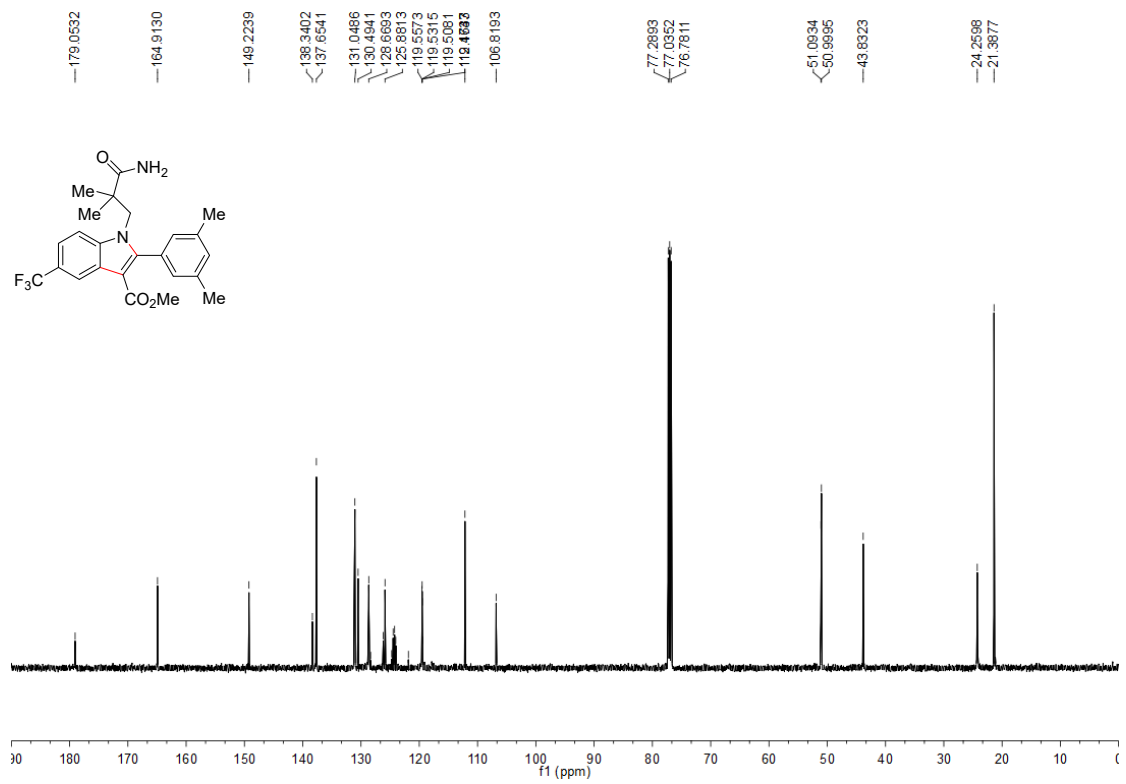

24c

<sup>1</sup>H NMR

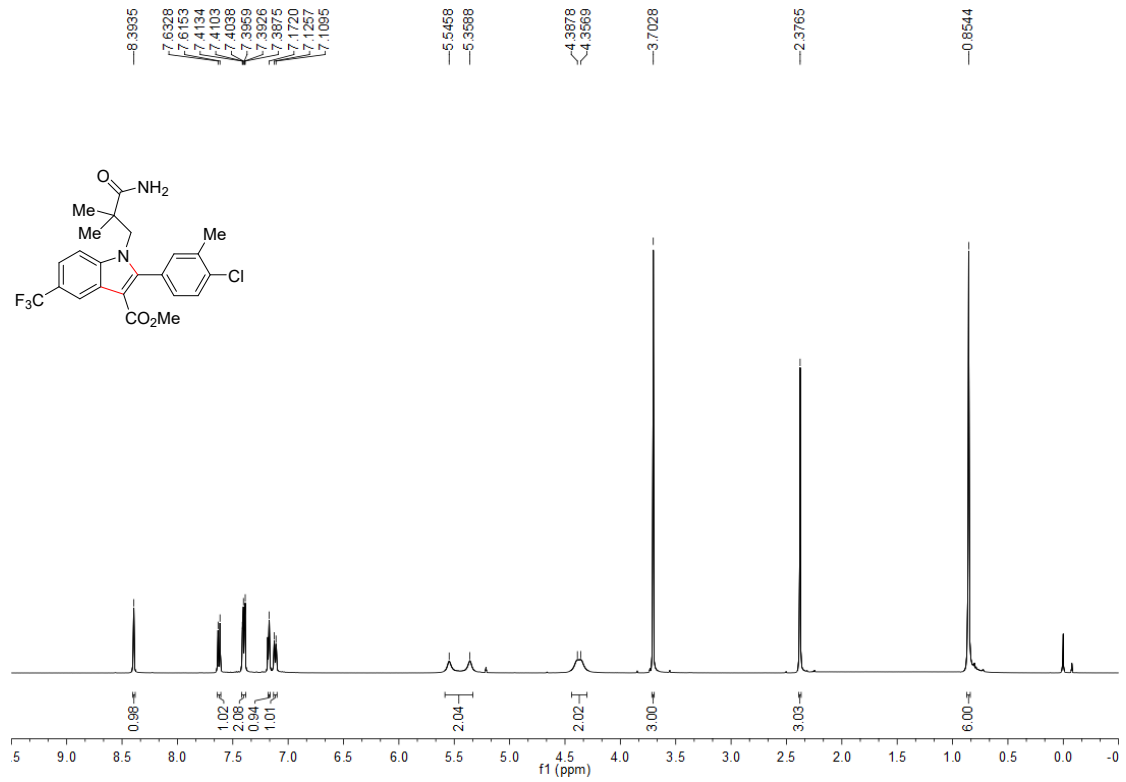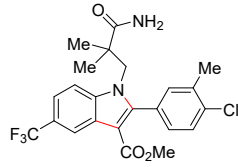

<sup>13</sup>C NMR

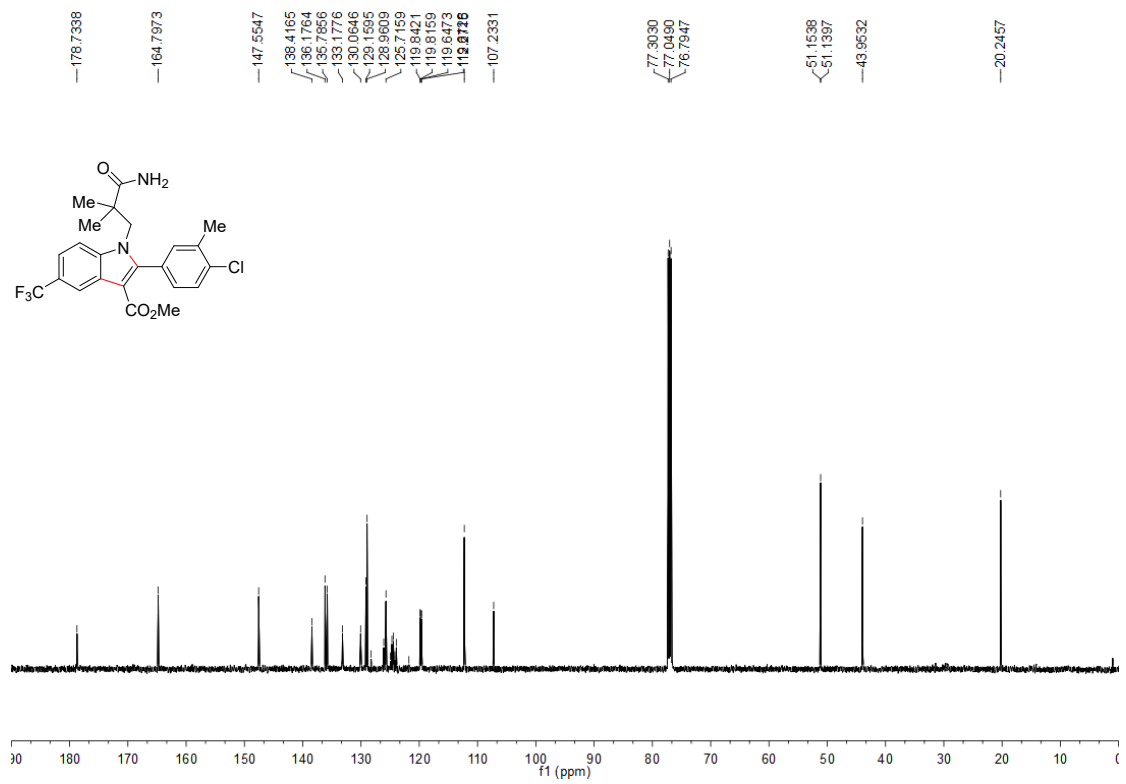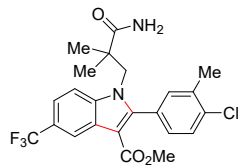

25c

<sup>1</sup>H NMR

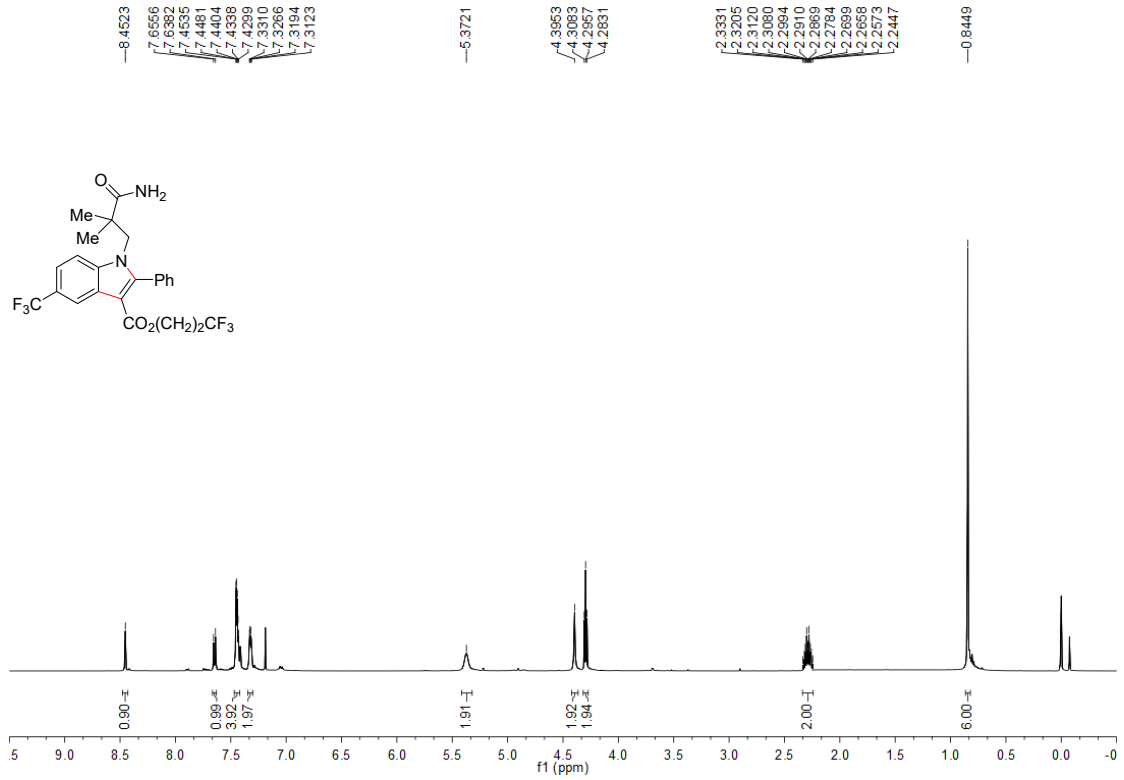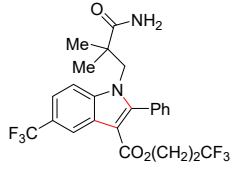

<sup>13</sup>C NMR

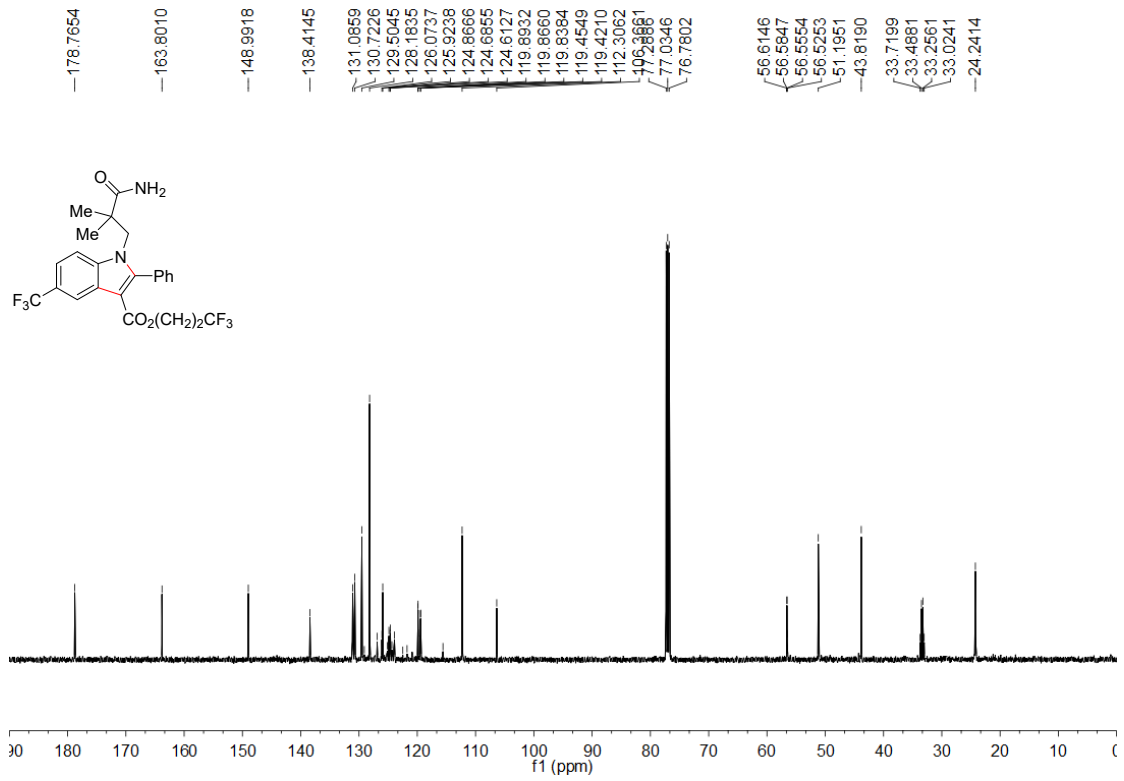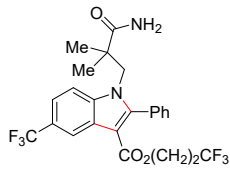

## 26c

 $^1\text{H NMR}$ 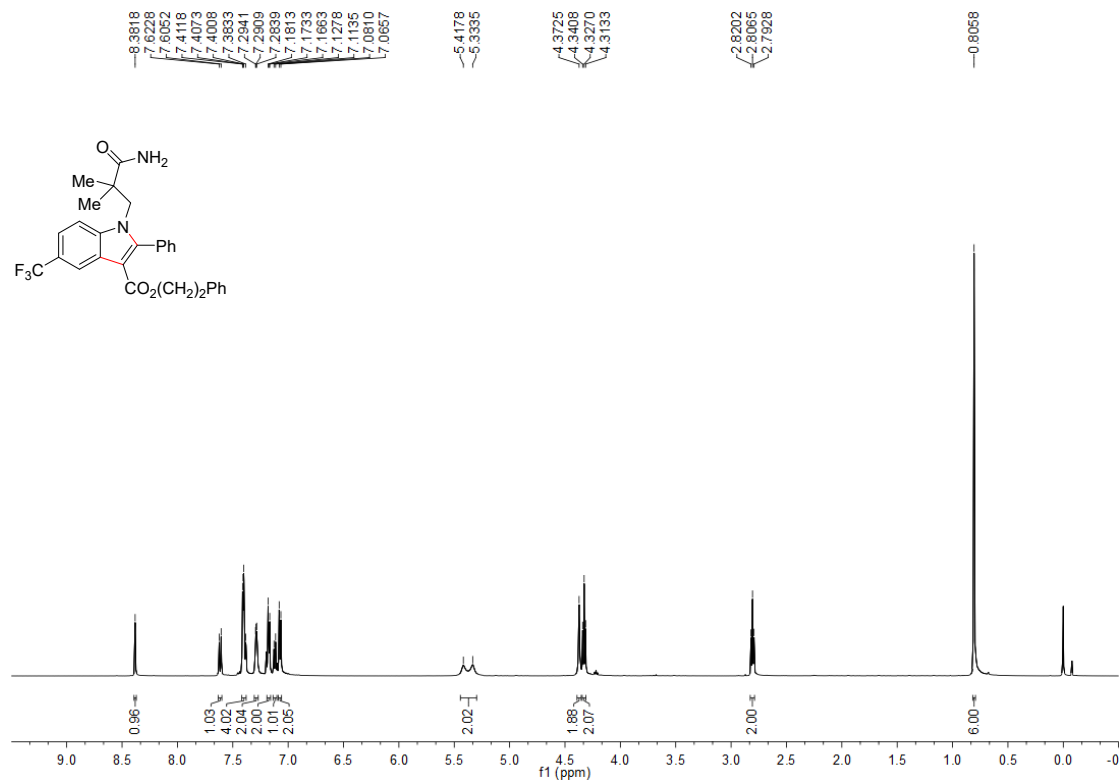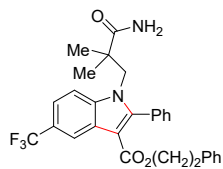 $^{13}\text{C NMR}$ 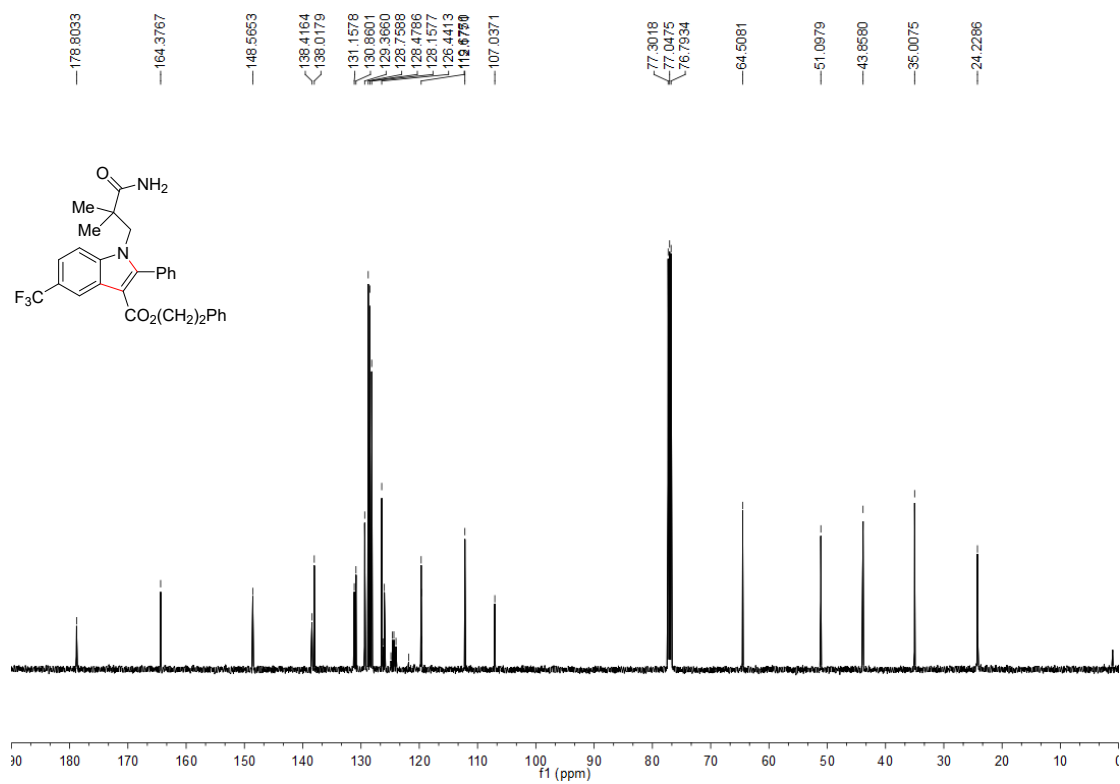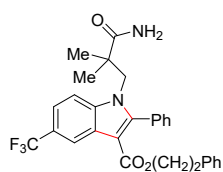

# 27c

## <sup>1</sup>H NMR

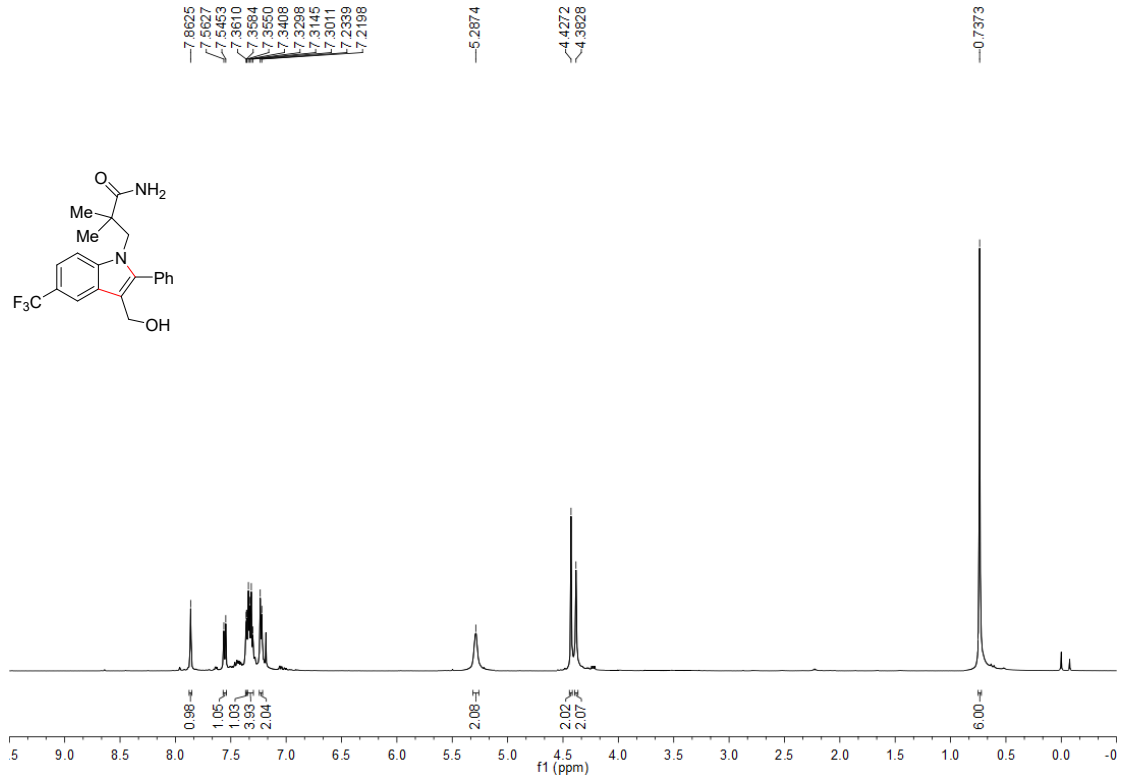

## <sup>13</sup>C NMR

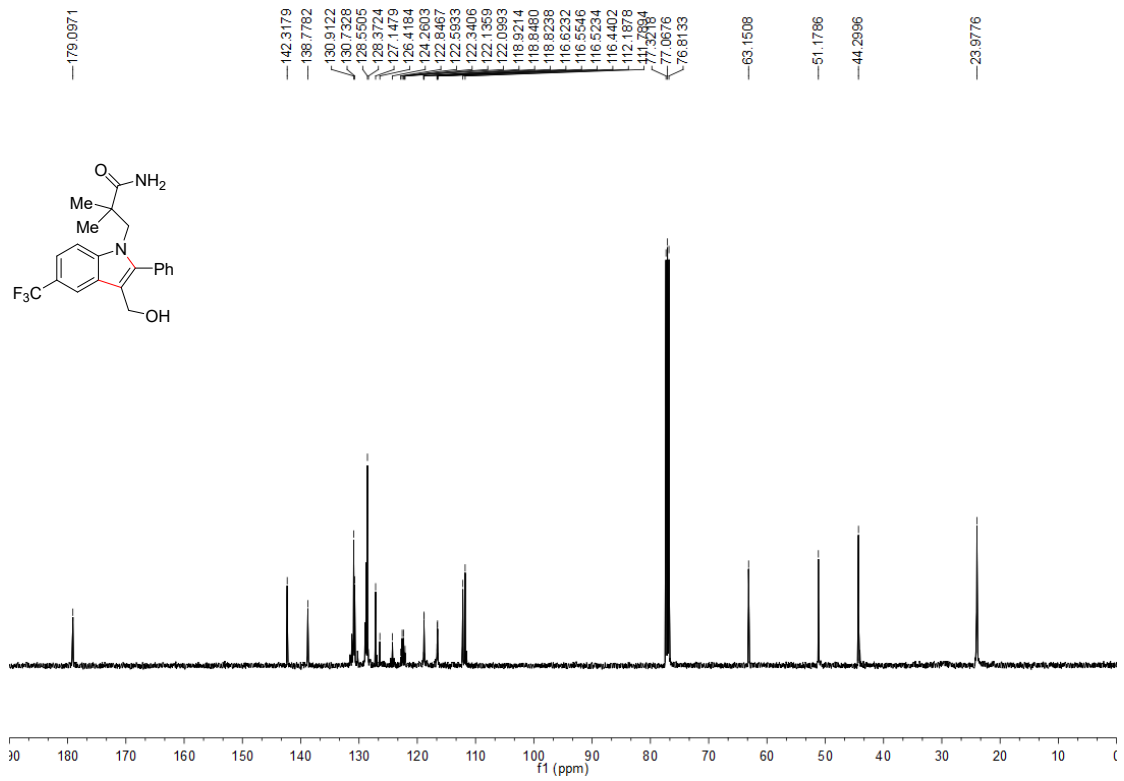

## 28c

<sup>1</sup>H NMR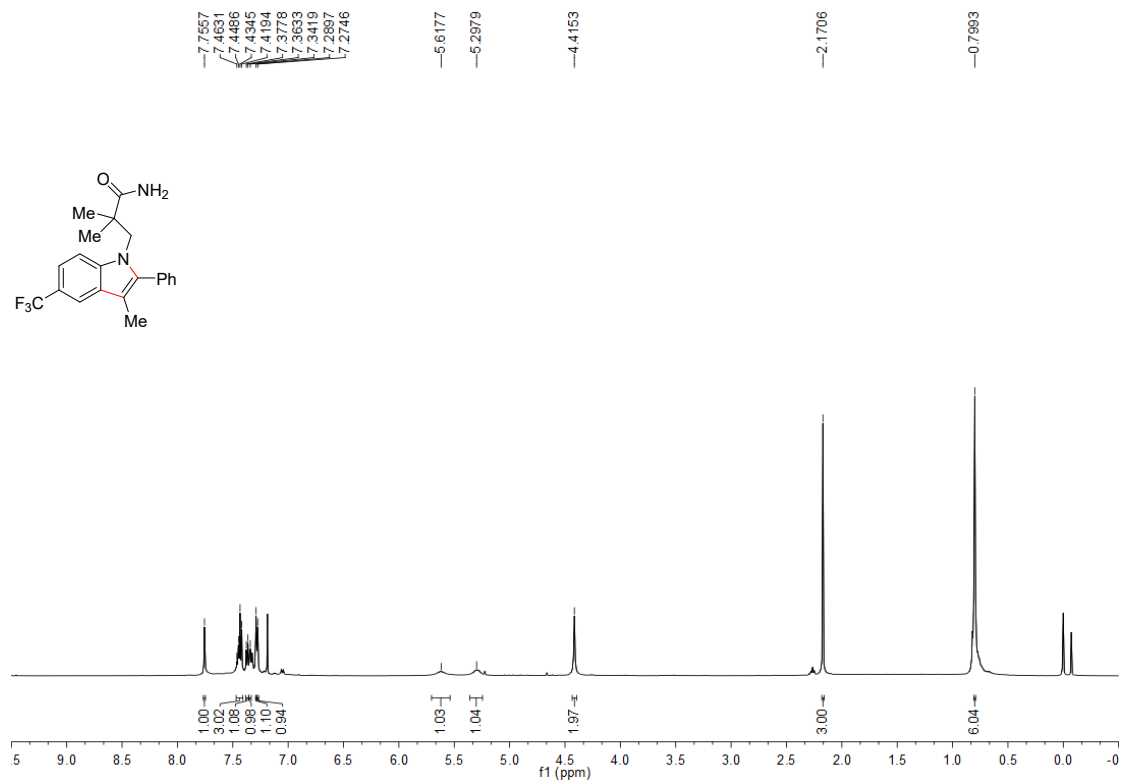<sup>13</sup>C NMR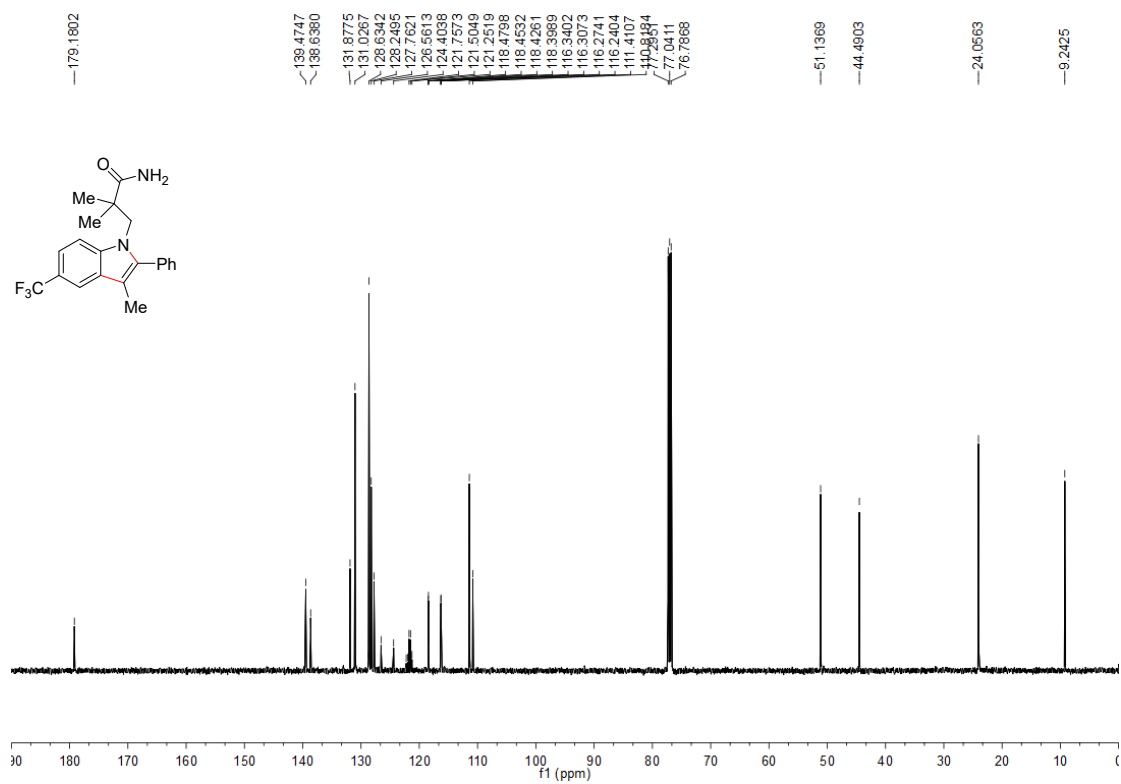

29c

<sup>1</sup>H NMR

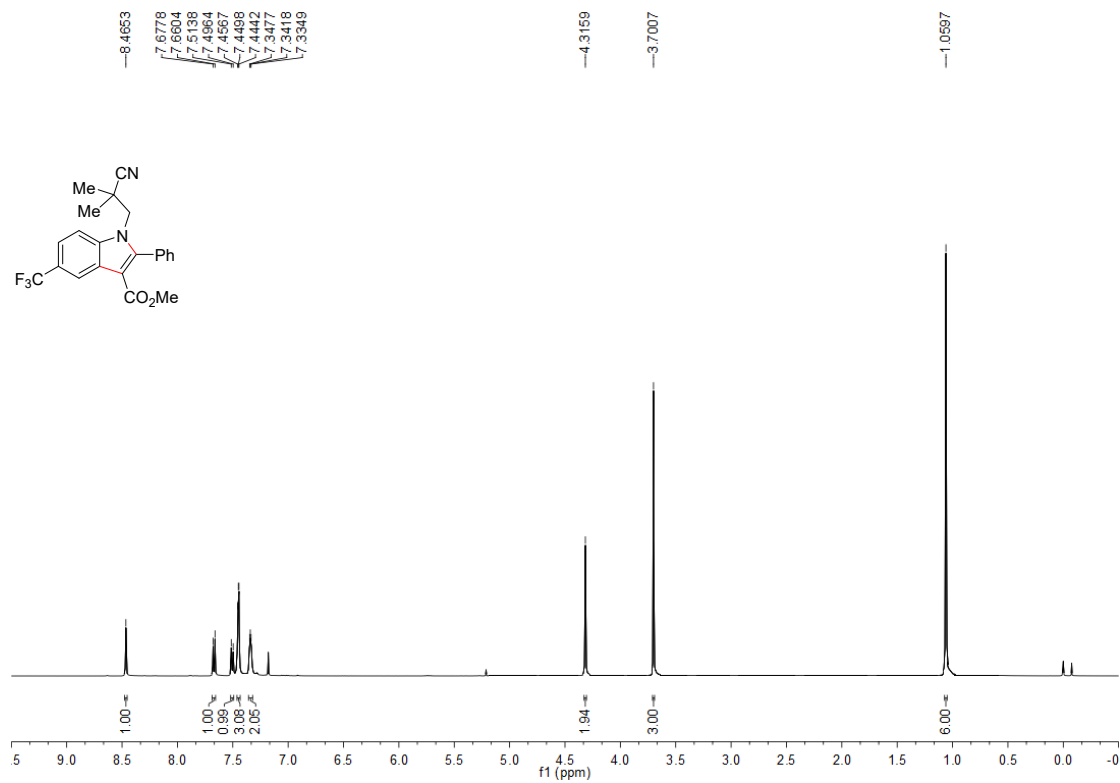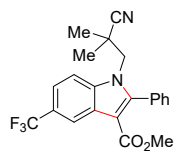

<sup>13</sup>C NMR

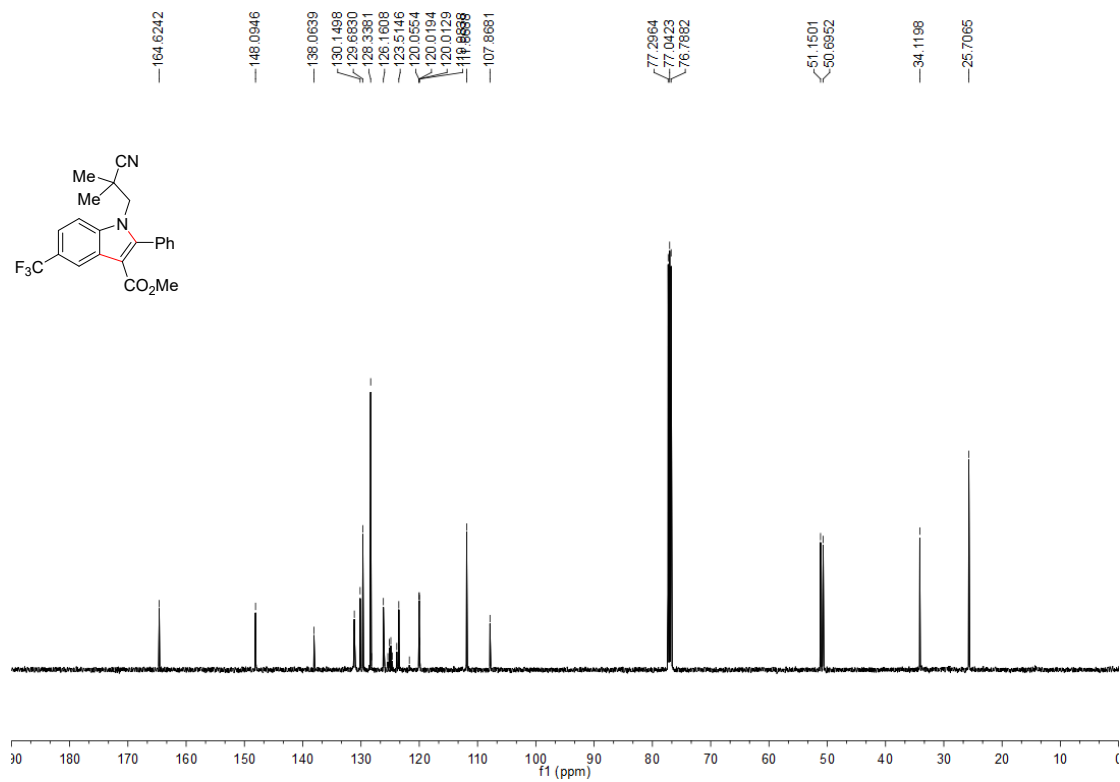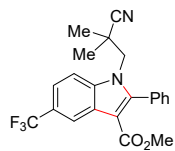



### 30c

#### <sup>1</sup>H NMR

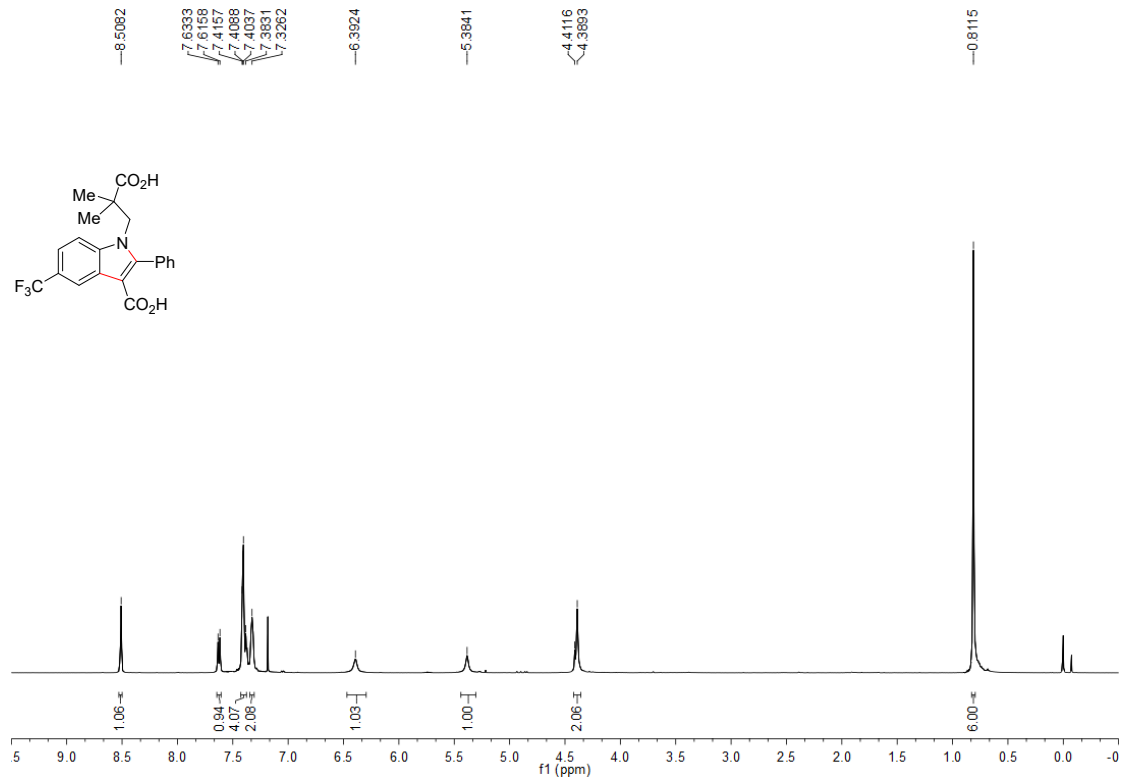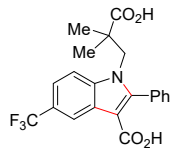

#### <sup>13</sup>C NMR

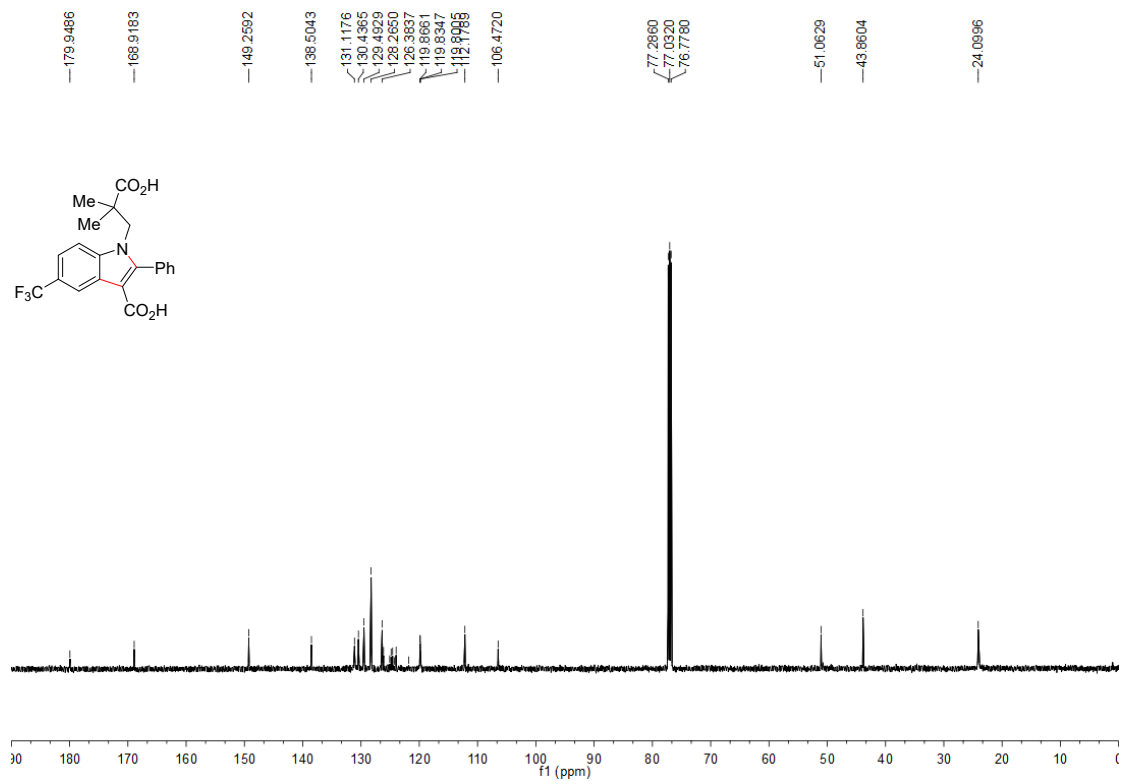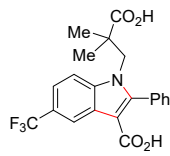

Supplement: d4cc03124e1.pdf [file d4cc03124e1.pdf]
